# Supplementary material for: Highly enantioselective Ni-catalyzed asymmetric hydrogenation of β,β-disubstituted acrylic acids
Source: Royal Society of Chemistry journal article supplement (doi:10.1039/d2qo00652a), 2022-01-01
Supplement: d2qo00652a1.pdf [file d2qo00652a1.pdf]

*Supplementary Information for:*

## **Highly Enantioselective Ni-Catalyzed Asymmetric Hydrogenation of $\beta$ , $\beta$ -Disubstituted Acrylic Acids**

Guiying Xiao,<sup>a</sup> Chaochao Xie,<sup>a</sup> Qianling Guo,<sup>a</sup> Guofu Zi,<sup>a</sup> Guohua Hou,<sup>\*a</sup> and  
Yuping Huang<sup>\*b</sup>

[a] Key Laboratory of Radiopharmaceuticals, College of Chemistry, Beijing Normal University, Beijing 100875, China

[b] Research Institute of Petroleum Processing, SINOPEC, Beijing 100083, China

\*Emails: ghhou@bnu.edu.cn; huangyuping.ripp@sinopec.com

### **Contents:**

|                                                                               |           |
|-------------------------------------------------------------------------------|-----------|
| <b>1. Experimental Section.....</b>                                           | <b>2</b>  |
| <b>2. General procedure for the synthesis of substrates.<sup>1</sup>.....</b> | <b>2</b>  |
| <b>3. NMR and HRMS data of substrates .....</b>                               | <b>3</b>  |
| <b>4. General procedure for asymmetric hydrogenation of 1. ....</b>           | <b>8</b>  |
| <b>5. NMR, GC or HPLC, optical rotation and HRMS Data of compound 2. ....</b> | <b>9</b>  |
| <b>6. Procedure for the synthesis of compounds 3, 4 and 5. ....</b>           | <b>16</b> |
| <b>7. General procedure for the synthesis of 8 . ....</b>                     | <b>18</b> |
| <b>8. Deuterium labelling studies.....</b>                                    | <b>20</b> |
| <b>9. References .....</b>                                                    | <b>22</b> |
| <b>10. NMR, SFC and HPLC spectra .....</b>                                    | <b>25</b> |

## 1. Experimental Section

**General Information:** All the air or moisture sensitive reactions and manipulations were performed by using standard Schlenk techniques and in a nitrogen-filled glovebox.  $^1\text{H}$  NMR and  $^{13}\text{C}$  NMR spectra were recorded on JEOL JNM-ECX600P and JNM-ECS600 (400 MHz or 600 MHz) spectrometers. ( $\text{CDCl}_3$  was the solvent used for the NMR analysis, with TMS as the internal standard). Optical rotation was determined using Autopol III Automatic polarimeter (Rudolph research Analytical). HPLC analysis was conducted on Agilent 1260 series instrument. SFC analysis was conducted on Agilent 1260 series instrument. GC analysis was conducted on Agilent 7890 series instrument. HRMS were recorded on a Waters LCT Premier XE mass spectrometer with TOF.

## 2. General procedure for the synthesis of substrates.<sup>1</sup>

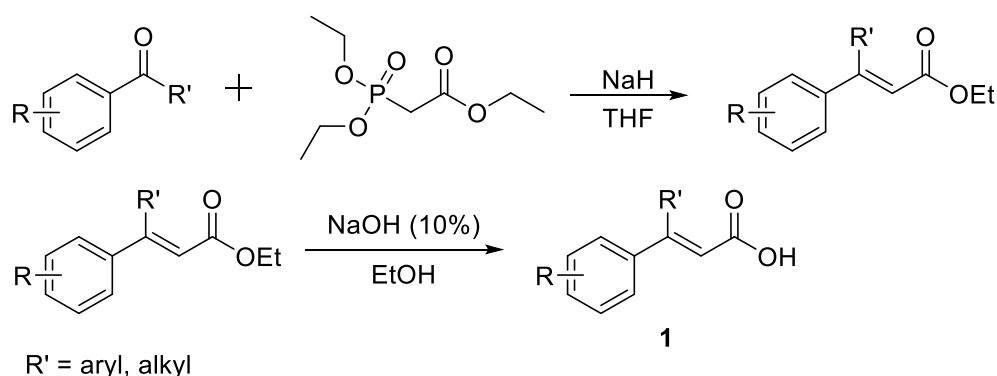

$\text{NaH}$  (45 mmol, 1.5 eq, 70% in mineral oil) was placed in an oven-dried 250 mL three-neck round bottom flask. Then THF (50 mL) was added dropwise with stirring under nitrogen, and the mixture was cooled to  $0\text{ }^\circ\text{C}$ . Triethyl phosphonoacetate (45 mmol, 1.5 eq) was added dropwise to the suspension at  $0\text{ }^\circ\text{C}$ , followed by stirring for 1 h at room temperature. Ketone (30 mmol, 1.0 eq) in THF (50 mL) was added dropwise. After that, the solution was stirred at room temperature until no starting material was detected by TLC. The reaction was quenched by the dropwise addition of a saturated saturated aqueous  $\text{NH}_4\text{Cl}$  solution (50 mL) and the product extracted with EtOAc, dried over  $\text{Na}_2\text{SO}_4$ , filtered and concentrated in vacuo. The crude residue was purified by flash chromatography (EtOAc: Petroleum ether = 1:50 to 1:20) to give the (*E*)-ester or (*Z*)-ester as a colourless oil (yield: 18-82%).

NaOH<sub>aq</sub> (10%, 20 mL) was added to a solution of the corresponding (*E*)-ester or (*Z*)-ester (5.0 mmol, 1.0 eq) in EtOH (20 mL) at room temperature. The reaction was stirred at room temperature until no starting material was detected by TLC, after which the volatiles were removed in vacuo and the residue slowly acidified with 2 M HCl<sub>aq</sub>. The product was extracted with ethyl acetate, dried over Na<sub>2</sub>SO<sub>4</sub> and concentrated in vacuo. The crude product was recrystallised from boiling ethyl acetate and hexane to give **1** as white needles.

### 3. NMR and HRMS data of substrates

#### (*E*)-3-(2-fluorophenyl)but-2-enoic acid (**1a**)

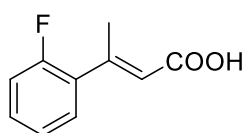

Purification by recrystallization (PE : EA = 5 : 1) afforded the product as a white solid; 0.87 g, yield: 97%; <sup>1</sup>H NMR (400 MHz, Chloroform-*d*) δ 7.37-7.27 (m, 2H), 7.17-7.11 (m, 1H), 7.12-7.06 (m, 1H), 6.07-6.04 (m, 1H), 2.62-2.43 (m, 3H). MP: 91-93 °C. The analytical data are consistent with the literature.<sup>1</sup>

#### (*Z*)-3-(2-fluorophenyl)but-2-enoic acid (**1b**)

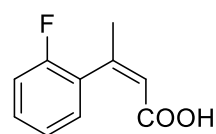

Purification by recrystallization (PE : EA = 5 : 1) afforded the product as a white solid; 0.85 g, yield: 95%; <sup>1</sup>H NMR (400 MHz, Chloroform-*d*) δ 7.31-7.21 (m, 1H), 7.15-7.08 (m, 2H), 7.06-6.96 (m, 1H), 6.01-5.96 (m, 1H), 2.18 (s, 3H). <sup>13</sup>C NMR (150 MHz, Chloroform-*d*) δ 170.5, 158.4 (d, *J* = 246.3 Hz), 152.1, 129.6 (d, *J* = 8.4 Hz), 128.7 (d, *J* = 3.6 Hz), 128.1 (d, *J* = 16.2 Hz), 123.8 (d, *J* = 3.0 Hz), 119.5, 115.5 (d, *J* = 22.1 Hz), 26.7. MP: 124-126 °C. The analytical data are consistent with the literature.<sup>2</sup>

#### (*Z*)-3-(2-chlorophenyl)but-2-enoic acid (**1c**)

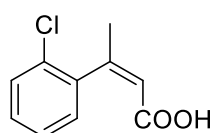

Purification by recrystallization (PE : EA = 5 : 1) afforded the product as a white solid; 0.95 g, yield: 97%; <sup>1</sup>H NMR (600 MHz, Chloroform-*d*) δ 7.38-7.33 (m, 1H), 7.24-7.19 (m, 2H), 7.05-7.02 (m, 1H), 5.97 (q, *J* = 1.3 Hz, 1H), 2.16 (d, *J* = 1.5 Hz, 3H). <sup>13</sup>C NMR (100 MHz, Chloroform-*d*) δ 170.3, 156.2, 139.9, 130.5, 129.4, 128.7, 127.8, 126.7, 119.2, 26.5. MP: 96-98 °C. The analytical data are consistent with the literature.<sup>3</sup>

(Z)-3-(3-nitrophenyl)but-2-enoic acid (**1d**)

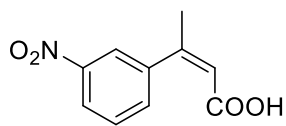

Purification by recrystallization (PE : EA = 5 : 1) afforded the product as a white solid; 0.98 g, yield: 95%; <sup>1</sup>H NMR (600 MHz, Chloroform-*d*) δ 8.179-8.14 (m, 1H), 8.04-8.03 (m, 1H), 7.51-7.48 (m, 2H), 5.97 (d, *J* = 1.4 Hz, 1H), 2.21 (d, *J* = 1.4 Hz, 3H). <sup>13</sup>C NMR (150 MHz, Chloroform-*d*) δ 169.9, 155.9, 148.0, 141.9, 133.2, 129.1, 122.9, 122.0, 118.6, 27.4. MP: 106-108 °C. APCI-HRMS calcd for C<sub>10</sub>H<sub>10</sub>NO<sub>4</sub><sup>+</sup> [M+H<sup>+</sup>] 208.0304, found 208.0308.

(Z)-3-(3-fluorophenyl)but-2-enoic acid (**1e**)

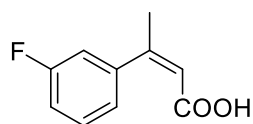

Purification by recrystallization (PE : EA = 5 : 1) afforded the product as a white solid; 0.85 g, yield: 95%; <sup>1</sup>H NMR (600 MHz, Chloroform-*d*) δ 7.31-7.26 (m, 1H), 7.02-6.97 (m, 1H), 6.97-6.94 (m, 1H), 6.91-6.87 (m, 1H), 5.90 (q, *J* = 1.4 Hz, 1H), 2.17 (d, *J* = 1.5 Hz, 3H). <sup>13</sup>C NMR (150 MHz, Chloroform-*d*) δ 170.8, 162.5 (d, *J* = 245.9 Hz), 156.9, 142.5 (d, *J* = 8.2 Hz), 129.7 (d, *J* = 8.1 Hz), 122.7, 117.7, 114.9 (d, *J* = 21.3 Hz), 114.1 (d, *J* = 22.6 Hz), 27.5. MP: 98-100 °C. The analytical data are consistent with the literature.<sup>2</sup>

(Z)-3-(3-bromophenyl)but-2-enoic acid (**1f**)

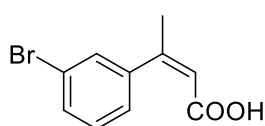

Purification by recrystallization (PE : EA = 5 : 1) afforded the product as a white solid; 1.1 g, yield: 94%; <sup>1</sup>H NMR (400 MHz, Chloroform-*d*) δ 7.45-7.41 (m, 1H), 7.32 (t, *J* = 1.8 Hz, 1H), 7.20 (t, *J* = 7.8 Hz, 1H), 7.14-7.08 (m, 1H), 5.91-5.87 (m, 1H), 2.16 (d, *J* = 1.4 Hz, 3H). <sup>13</sup>C NMR (150 MHz, Chloroform-*d*) δ 170.8, 156.7, 142.4, 131.0, 129.8, 129.7, 125.7, 122.1, 117.8, 27.6. MP: 112-114 °C. The analytical data are consistent with the literature.<sup>4</sup>

(Z)-3-(4-nitrophenyl)but-2-enoic acid (**1g**)

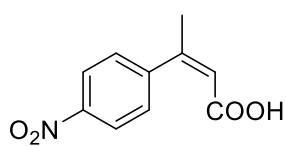

Purification by recrystallization (PE : EA = 5 : 1) afforded the product as a white solid; 0.99 g, yield: 96%; <sup>1</sup>H NMR (400 MHz, Chloroform-*d*) δ 8.22-8.15 (m, 2H), 7.36-7.30 (m, 2H), 5.98 (d, *J* = 1.4 Hz, 1H), 2.20 (d, *J* = 1.7 Hz, 3H). <sup>13</sup>C NMR (150 MHz, Chloroform-*d*) δ 169.4, 156.3, 147.5, 147.4, 127.8, 123.5, 118.4, 27.3. MP: 156-157 °C. APCI-HRMS

calcd for  $C_{10}H_{10}NO_4^+$   $[M+H^+]$  208.0304, found 208.0308.

**(Z)-3-(4-fluorophenyl)but-2-enoic acid (1h)**

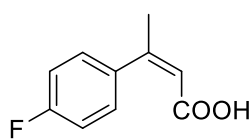

Purification by recrystallization (PE : EA = 5 : 1) afforded the product as a white solid; 0.83 g, yield: 93%;  $^1H$  NMR (600 MHz, Chloroform-*d*)  $\delta$  7.21-7.14 (m, 2H), 7.04-6.96 (m, 2H), 5.92-5.87 (m, 1H), 2.17 (d,  $J = 1.2$  Hz, 3H).  $^{13}C$  NMR (100 MHz, Chloroform-*d*)  $\delta$  171.0, 162.6 (d,  $J = 246.8$  Hz), 157.4, 136.0 (d,  $J = 3.2$  Hz), 128.9 (d,  $J = 8.2$  Hz), 117.2, 115.1 (d,  $J = 21.5$  Hz), 27.7. MP: 99-101 °C. The analytical data are consistent with the literature.<sup>2</sup>

**(Z)-3-(4-chlorophenyl)but-2-enoic acid (1i)**

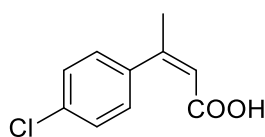

Purification by recrystallization (PE : EA = 5 : 1) afforded the product as a white solid; 0.93 g, yield: 95%;  $^1H$  NMR (400 MHz, Chloroform-*d*)  $\delta$  7.32-7.28 (m, 2H), 7.16-7.10 (m, 2H), 5.90 (q,  $J = 1.4$  Hz, 1H), 2.17 (d,  $J = 1.4$  Hz, 3H).  $^{13}C$  NMR (150 MHz, Chloroform-*d*)  $\delta$  171.1, 157.2, 138.6, 134.1, 128.4, 128.3, 117.5, 27.5. MP: 111-113 °C. The analytical data are consistent with the literature.<sup>5</sup>

**(Z)-3-(*o*-tolyl)but-2-enoic acid (1j)**

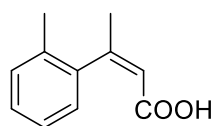

Purification by recrystallization (PE : EA = 5 : 1) afforded the product as a white solid; 0.83g, yield: 95%;  $^1H$  NMR (600 MHz, Chloroform-*d*)  $\delta$  7.19-7.15 (m, 3H), 6.97-6.91 (m, 1H), 5.96-5.93 (m, 1H), 2.19 (s, 3H), 2.11 (d,  $J = 1.4$  Hz, 3H).  $^{13}C$  NMR (150 MHz, Chloroform-*d*)  $\delta$  169.6, 158.9, 140.6, 133.4, 129.9, 127.4, 125.8, 125.7, 118.1, 27.6, 19.1. MP: 134-136 °C. The analytical data are consistent with the literature.<sup>6</sup>

**(Z)-3-(*m*-tolyl)but-2-enoic acid (1k)**

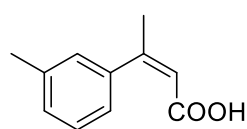

Purification by recrystallization (PE : EA = 5 : 1) afforded the product as a white solid; 0.81 g, yield: 93%;  $^1H$  NMR (600 MHz, Chloroform-*d*)  $\delta$  7.22 (t,  $J = 7.7$  Hz, 1H), 7.12 (d, 1H), 7.00 (d,  $J = 7.8$  Hz, 2H), 5.89-5.85 (m, 1H), 2.34 (s, 3H), 2.18 (d,  $J = 1.3$  Hz, 3H).  $^{13}C$  NMR (150 MHz, Chloroform-*d*)  $\delta$  170.7, 158.3, 140.2, 137.7, 128.9, 127.9, 127.5, 124.1, 116.8, 27.7, 21.5. MP: 90-92 °C. The analytical data are consistent with the literature.<sup>6</sup>

**(Z)-3-(*p*-tolyl)but-2-enoic acid (1l)**

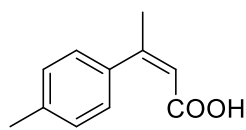

Purification by recrystallization (PE : EA = 5 : 1) afforded the product as a white solid; 0.83 g, yield: 95%; <sup>1</sup>H NMR (600 MHz, Chloroform-*d*) δ 7.17-7.08 (m, 4H), 5.91-5.81 (m, 1H), 2.35 (s, 3H), 2.18 (d, *J* = 1.2 Hz, 3H). <sup>13</sup>C NMR (100 MHz, Chloroform-*d*) δ 170.6, 158.2, 138.1, 137.2, 128.8, 127.0, 116.6, 27.6, 21.4. MP: 108-110 °C. The analytical data are consistent with the literature.<sup>6</sup>

**(Z)-3-(naphthalen-2-yl)but-2-enoic acid (1m)**

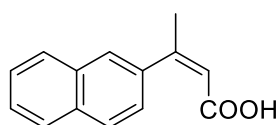

Purification by recrystallization (PE : EA = 5 : 1) afforded the product as a white solid; 0.98 g, yield: 93%; <sup>1</sup>H NMR (600 MHz, Chloroform-*d*) δ 7.83-7.75 (m, 3H), 7.67-7.64 (m, 1H), 7.49-7.44 (m, 2H), 7.31 (dd, *J* = 8.4, 1.7 Hz, 1H), 5.97 (d, *J* = 1.4 Hz, 1H), 2.27 (d, *J* = 1.4 Hz, 3H). <sup>13</sup>C NMR (100 MHz, Chloroform-*d*) δ 170.1, 158.2, 137.8, 133.0, 133.0, 128.3, 127.8, 127.6, 126.3, 126.2, 125.8, 125.5, 117.2, 27.8. MP: 129-131 °C. The analytical data are consistent with the literature.<sup>6</sup>

**(Z)-3-phenylbut-2-enoic acid (1n)**

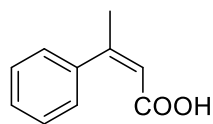

Purification by recrystallization (PE : EA = 5 : 1) afforded the product as a white solid; 0.77 g, yield: 96%; <sup>1</sup>H NMR (400 MHz, Chloroform-*d*) δ 7.35-7.29 (m, 3H), 7.22-7.16 (m, 2H), 5.88 (q, *J* = 1.3 Hz, 1H), 2.19 (d, *J* = 1.4 Hz, 3H). <sup>13</sup>C NMR (150 MHz, Chloroform-*d*) δ 171.1, 158.3, 140.3, 128.1, 128.1, 126.9, 117.0, 27.7. MP: 120-122 °C. MP: 128-130 °C. The analytical data are consistent with the literature.<sup>7</sup>

**(Z)-3-phenylpent-2-enoic acid (1o)**

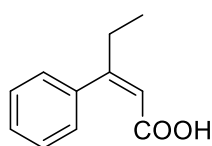

Purification by recrystallization (PE : EA = 5 : 1) afforded the product as a white solid; 0.82 g, yield: 95%; <sup>1</sup>H NMR (600 MHz, Chloroform-*d*) δ 7.34-7.27 (m, 3H), 7.15-7.10 (m, 2H), 5.83 (t, *J* = 1.3 Hz, 1H), 2.49-2.40 (m, 2H), 1.02 (t, *J* = 7.4 Hz, 3H). <sup>13</sup>C NMR (100 MHz, Chloroform-*d*) δ 171.5, 163.8, 139.9, 128.0, 127.9, 127.1, 115.6, 33.9, 12.2. MP: 90-92 °C. The analytical data are consistent with the literature.<sup>7</sup>

**(Z)-4-methyl-3-phenylpent-2-enoic acid (1p)**

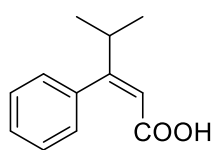

Purification by recrystallization (PE : EA = 5 : 1) afforded the product as a white solid; 0.93 g, yield: 93%;  $^1\text{H}$  NMR (400 MHz, Chloroform-*d*)  $\delta$  7.35-7.27 (m, 3H), 7.10-7.05 (m, 2H), 5.82 (d,  $J$  = 0.9 Hz, 1H), 2.72-2.59 (m, 1H), 1.06 (d,  $J$  = 6.8 Hz, 6H).  $^{13}\text{C}$  NMR (100 MHz, Chloroform-*d*)  $\delta$  167.9, 139.7, 127.8, 127.6, 127.2, 115.0, 37.7, 21.2. MP: 88-90 °C. The analytical data are consistent with the literature.<sup>6</sup>

**(Z)-3-cyclohexyl-3-phenylacrylic acid (1q)**

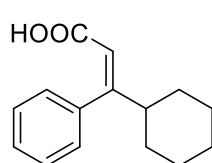

Purification by recrystallization (PE : EA = 5 : 1) afforded the product as a white solid; 1.1 g, yield: 96%;  $^1\text{H}$  NMR (600 MHz, Chloroform-*d*)  $\delta$  7.34-7.27 (m, 3H), 7.10-7.02 (m, 2H), 5.81-5.75 (m, 1H), 2.28-2.21 (m, 1H), 1.80-1.73 (m, 4H), 1.69-1.63 (m, 1H), 1.28-1.20 (m, 2H), 1.18-1.10 (m, 3H).  $^{13}\text{C}$  NMR (100 MHz, Chloroform-*d*)  $\delta$  171.8, 167.1, 140.1, 127.8, 127.5, 127.2, 115.3, 47.8, 31.7, 26.5, 26.1. MP: 140-142 °C. The analytical data are consistent with the literature.<sup>8</sup>

**(E)-3-phenylpent-2-enoic acid (1r)**

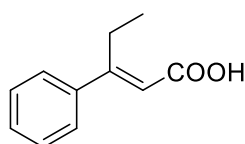

Purification by recrystallization (PE : EA = 5 : 1) afforded the product as a white solid; 0.89 g, yield: 94%;  $^1\text{H}$  NMR (600 MHz, Chloroform-*d*)  $\delta$  7.48-7.45 (m, 2H), 7.41-7.38 (m, 3H), 6.05 (s, 1H), 3.13 (q,  $J$  = 7.5 Hz, 2H), 1.09 (t,  $J$  = 7.5 Hz, 3H). MP: 95-97 °C. The analytical data are consistent with the literature.<sup>1</sup>

**(E)-4-methyl-3-phenylpent-2-enoic acid (1s)**

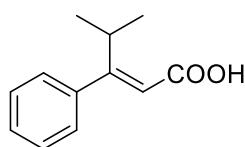

Purification by recrystallization (PE : EA = 5 : 1) afforded the product as a white solid; 0.81 g, yield: 93%;  $^1\text{H}$  NMR (600 MHz, Chloroform-*d*)  $\delta$  7.36-7.32 (m, 3H), 7.23-7.20 (m, 2H), 5.75 (s, 1H), 4.19-4.12 (m, 1H), 1.10 (dd,  $J$  = 7.0, 1.2 Hz, 6H). MP: 97-97 °C. The analytical data are consistent with the literature.<sup>1</sup>

(Z)-3-phenyl-3-(*o*-tolyl)acrylic acid (**1t**)

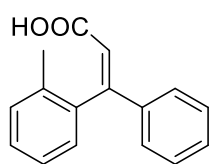

Purification by recrystallization (PE : EA = 3 : 1) afforded the product as a white solid; 1.0 g, yield: 91%; <sup>1</sup>H NMR (600 MHz, Chloroform-*d*) δ 7.38-7.27 (m, 6H), 7.22 (d, *J* = 7.4 Hz, 2H), 7.06 (d, *J* = 7.4 Hz, 1H), 6.49 (s, 1H), 2.06 (s, 3H). <sup>13</sup>C NMR (150 MHz, Chloroform-*d*) δ 170.6, 158.4, 139.3, 138.1, 135.4, 130.1, 129.9, 128.7, 128.5, 128.1, 127.7, 125.6, 116.9, 19.7. MP: 110-112 °C. APCI-HRMS calcd for C<sub>16</sub>H<sub>15</sub>O<sub>2</sub><sup>+</sup> [M+H<sup>+</sup>] 239.1067, found 239.1070.

3-phenyl-3-(*o*-tolyl)acrylic acid (**1u**)

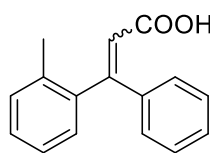

Purification by recrystallization (PE : EA = 3 : 1) afforded the product as a white solid (*E*:*Z*=8:1); 1.1 g, yield: 93%; <sup>1</sup>H NMR (400 MHz, Chloroform-*d*; *E* isomer) δ 7.35-7.24 (m, 6H), 7.21-7.17 (m, 2H), 7.15 (d, *J* = 7.3 Hz, 1H), 6.00 (s, 1H), 2.05 (s, 3H). <sup>13</sup>C NMR (100 MHz, Chloroform-*d*; *E* isomer) δ 171.4, 159.6, 141.9, 138.3, 136.1, 130.8, 129.6, 129.4, 128.9, 128.8, 127.9, 125.83, 119.0, 20.4. MP: 132-134 °C. APCI-HRMS calcd for C<sub>16</sub>H<sub>15</sub>O<sub>2</sub><sup>+</sup> [M+H<sup>+</sup>] 239.1067, found 239.1070.

ethyl (Z)-3-(2-fluorophenyl)but-2-enoate (**1v**)

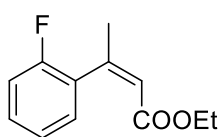

Purification by column chromatography (PE : EA = 50:1 to 20:1) afforded the product as a colourless oil; 2.1 g, yield: 34%; <sup>1</sup>H NMR (400 MHz, Chloroform-*d*) δ 7.34-7.23 (m, 1H), 7.14-7.10 (m, 2H), 7.08-7.02 (m, 1H), 6.01 (q, *J* = 1.2 Hz, 1H), 4.00 (q, *J* = 7.1 Hz, 2H), 2.17 (d, *J* = 1.4 Hz, 3H), 1.08 (t, *J* = 7.2 Hz, 3H). <sup>13</sup>C NMR (150 MHz, Chloroform-*d*) δ 165.4, 158.6 (d, *J* = 245.8 Hz), 149.3, 129.4 (d, *J* = 8.1 Hz), 128.8 (d, *J* = 3.3 Hz), 128.7 (d, *J* = 16.6 Hz), 123.8 (d, *J* = 2.7 Hz), 120.2, 115.4 (d, *J* = 22.3 Hz), 59.9, 26.4, 14.0. The analytical data are consistent with the literature.<sup>9</sup>

#### 4. General procedure for asymmetric hydrogenation of **1**.

A stock solution was made by mixing Ni(OAc)<sub>2</sub>·H<sub>2</sub>O with (*S,S*)-Ph-BPE in a 1:1.1 molar ratio in solvent (CF<sub>3</sub>CH<sub>2</sub>OH) at room temperature for 12 hours in a nitrogen-filled glovebox. An aliquot of the catalyst solution (1.0 mL, 0.00125 mmol) was transferred by syringe into the vials charged with different substrates (0.125 mmol for



each) and added additive HOAc. The vials were subsequently transferred into an autoclave which hydrogen gas was charged. The reaction was then stirred under H<sub>2</sub> (80 atm) at r.t. for 12-24 h. The hydrogen gas was released slowly and carefully. The solution was passed through a short column of silica gel to remove the metal complex. The conversion of products were determined by GC or <sup>1</sup>H NMR analysis. The crude products were concentrated and purified by flash column chromatography and the ee values were determined by HPLC, SFC analysis on a chiral stationary phase.

## 5. NMR, GC or HPLC, optical rotation and HRMS Data of compound 2.

### (+)-3-(2-fluorophenyl)butanoic acid (**2a**)

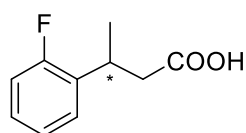

Purification by flash column chromatography (silica gel, PE : EA = 1 : 1) afforded the product as light yellow oil; 22.0 mg, yield: 97%; 93% ee;  $[\alpha]_{\text{D}}^{20} = +13.2$  (c = 1.1, CH<sub>2</sub>Cl<sub>2</sub>); SFC conditions

(Lux 5u Amylose-1, column temperature: 37.0 °C, MeOH/CO<sub>2</sub> = 5/95, flow rate = 3.0 mL/min,  $\lambda = 210$  nm)  $t_{\text{R}} = 2.5$  min (major), 2.8 min (minor); <sup>1</sup>H NMR (400 MHz, Chloroform-*d*)  $\delta$  9.69 (s, 1H), 7.25-7.17 (m, 2H), 7.11-7.05 (m, 1H), 7.05-6.99 (m, 1H), 3.75-3.46 (m, 1H), 2.84-2.51 (m, 2H), 1.34 (d,  $J = 7.0$  Hz, 3H). The analytical data are consistent with the literature.<sup>1</sup>

### (-)-3-(2-fluorophenyl)butanoic acid (**2b**)

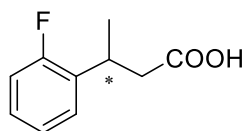

Purification by flash column chromatography (silica gel, PE : EA = 1 : 1) afforded the product as light yellow oil; 22.3 mg, yield: 98%; 99% ee;  $[\alpha]_{\text{D}}^{20} = -22.9$  (c = 1.1, CH<sub>2</sub>Cl<sub>2</sub>); SFC conditions

(Lux 5u Amylose-1, column temperature: 37.0 °C, MeOH/CO<sub>2</sub> = 5/95, flow rate = 3.0 mL/min,  $\lambda = 210$  nm)  $t_{\text{R}} = 2.8$  min (minor), 3.2 min (major); <sup>1</sup>H NMR (400 MHz, Chloroform-*d*)  $\delta$  9.69 (s, 1H), 7.25-7.17 (m, 2H), 7.11-7.05 (m, 1H), 7.05-6.99 (m, 1H), 3.75-3.46 (m, 1H), 2.84-2.51 (m, 2H), 1.34 (d,  $J = 7.0$  Hz, 3H). The analytical data are consistent with the literature.<sup>1</sup>

### (-)-3-(2-chlorophenyl)butanoic acid (**2c**)

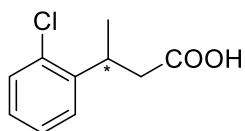

Purification by flash column chromatography (silica gel, PE : EA = 1 : 1) afforded the product as light yellow oil; 23.7 mg, yield: 96%; 90% ee;  $[\alpha]_{\text{D}}^{20} = -17.1$  (c = 1.2, CH<sub>2</sub>Cl<sub>2</sub>); SFC conditions

(Lux 5u Amylose-1, column temperature: 37.0 °C, MeOH/CO<sub>2</sub> = 5/95, flow rate = 3.0 mL/min,  $l = 210$  nm)  $t_R = 2.3$  min (major), 2.6 min (minor); <sup>1</sup>H NMR (600 MHz, Chloroform-*d*)  $\delta$  7.35 (d,  $J = 7.9$  Hz, 1H), 7.25-7.21 (m, 2H), 7.16-7.11 (m, 1H), 3.86-3.70 (m, 1H), 2.96-2.37 (m, 2H), 1.31 (d,  $J = 6.7$  Hz, 3H). The analytical data are consistent with the literature.<sup>1</sup>

(-)-3-(3-nitrophenyl)butanoic acid (**2d**)

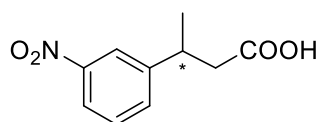

Purification by flash column chromatography (silica gel, PE : EA = 1 : 1) afforded the product as light yellow solid; 25.1 mg, yield: 96%; 94% ee;  $[\alpha]_D^{20} = -22.9$  ( $c = 1.3$ , CH<sub>2</sub>Cl<sub>2</sub>); SFC conditions (Lux 5u Amylose-1, column temperature: 37.0 °C, MeOH/CO<sub>2</sub> = 5/95, flow rate = 3.0 mL/min,  $l = 210$  nm)  $t_R = 14.8$  min (minor), 16.4 min (major); <sup>1</sup>H NMR (400 MHz, Chloroform-*d*)  $\delta$  8.14-8.04 (m, 2H), 7.61-7.53 (m, 1H), 7.48 (t,  $J = 7.8$  Hz, 1H), 3.40 (q,  $J = 7.2$  Hz, 1H), 2.78-2.58 (m, 2H), 1.37 (d,  $J = 7.0$  Hz, 3H). MP: 163-165 °C. The analytical data are consistent with the literature.<sup>1</sup>

(-)-3-(3-fluorophenyl)butanoic acid (**2e**)

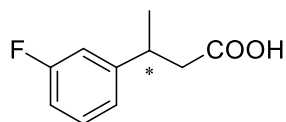

Purification by flash column chromatography (silica gel, PE : EA = 1 : 1) afforded the product as light yellow oil; 22.3 mg, yield: 98%; 98% ee;  $[\alpha]_D^{20} = -27.0$  ( $c = 1.1$ , CH<sub>2</sub>Cl<sub>2</sub>); The hydrogenated product was dissolved in CH<sub>2</sub>Cl<sub>2</sub>, and then aniline, EDC, and DMAP were added at 0 °C. The solution was stirred for 4 h. The residue was purified by chromatography; The ee values of the amides were determined by SFC analysis on a chiral stationary phase. SFC conditions (Lux 5u Cellulose-1, column temperature: 37.0 °C, MeOH/CO<sub>2</sub> = 10/90, flow rate = 3.0 mL/min,  $l = 210$  nm)  $t_R = 5.0$  min (major), 5.5 min (minor); <sup>1</sup>H NMR (600 MHz, Chloroform-*d*)  $\delta$  7.24 (d,  $J = 6.3$  Hz, 1H), 6.99 (d,  $J = 7.6$  Hz, 1H), 6.92-6.88 (m, 2H), 3.30-3.21 (m, 1H), 2.66-2.51 (m, 2H), 1.30 (d,  $J = 6.9$  Hz, 3H). The analytical data are consistent with the literature.<sup>1</sup>

(-)-3-(3-bromophenyl)butanoic acid (**2f**)

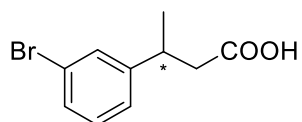

Purification by flash column chromatography (silica gel, PE : EA = 1 : 1) afforded the product as light yellow oil; 29.3 mg, yield: 97%; 96% ee;  $[\alpha]_D^{20} = -25.1$  ( $c = 1.5$ , CH<sub>2</sub>Cl<sub>2</sub>); The

hydrogenated product was dissolved in CH<sub>2</sub>Cl<sub>2</sub>, and then aniline, EDC, and DMAP were added at 0 °C. The solution was stirred for 4 h. The residue was purified by chromatography. The ee values of the amides were determined by SFC analysis on a chiral stationary phase; SFC conditions (Lux 5u Cellulose-3, column temperature: 37.0 °C, MeOH/CO<sub>2</sub> = 15/85, flow rate = 3.0 mL/min, λ = 210 nm) t<sub>R</sub> = 5.1 min (major), 5.4 min (minor); <sup>1</sup>H NMR (600 MHz, Chloroform-*d*) δ 7.40-7.31 (m, 2H), 7.21-7.11 (m, 2H), 3.24 (s, 1H), 2.88-2.46 (m, 2H), 1.31 (d, *J* = 6.6 Hz, 3H). The analytical data are consistent with the literature.<sup>1</sup>

(-)-3-(4-nitrophenyl)butanoic acid (**2g**)

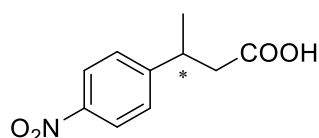

Purification by flash column chromatography (silica gel, PE : EA = 1 : 1) afforded the product as light yellow solid; 25.6 mg, yield: 98%; 94% ee; [α]<sub>D</sub><sup>20</sup> = -39.2 (c = 1.3, CH<sub>2</sub>Cl<sub>2</sub>); The hydrogenated product was dissolved in CH<sub>2</sub>Cl<sub>2</sub>, and then aniline, EDC, and DMAP were added at 0 °C. The solution was stirred for 4 h. The residue was purified by chromatography. The ee values of the amides were determined by SFC analysis on a chiral stationary phase; SFC conditions (Lux 5u Cellulose-3, column temperature: 37.0 °C, MeOH/CO<sub>2</sub> = 20/80, flow rate = 3.0 mL/min, λ = 210 nm) t<sub>R</sub> = 5.6 min (major), 6.1 min (minor); <sup>1</sup>H NMR (600 MHz, Chloroform-*d*) δ 8.16 (d, *J* = 8.4 Hz, 2H), 7.39 (d, *J* = 8.4 Hz, 2H), 3.39 (q, *J* = 6.7 Hz, 1H), 2.78-2.55 (m, 2H), 1.35 (d, *J* = 6.8 Hz, 3H). MP: 123-125 °C. The analytical data are consistent with the literature.<sup>1</sup>

(-)-3-(4-fluorophenyl)butanoic acid (**2h**)

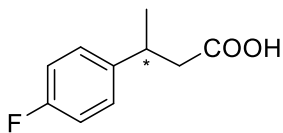

Purification by flash column chromatography (silica gel, PE : EA = 1 : 1) afforded the product as light yellow oil; 22.3 mg, yield: 98%; 93% ee; [α]<sub>D</sub><sup>20</sup> = -33.5 (c = 1.1, CHCl<sub>2</sub>); SFC conditions (Lux 5u Cellulose-1, column temperature: 37.0 °C, MeOH/CO<sub>2</sub> = 10/90, flow rate = 3.0 mL/min, λ = 210 nm) t<sub>R</sub> = 5.1 min (major), 5.7 min (minor); <sup>1</sup>H NMR (400 MHz, Chloroform-*d*) δ 7.22-7.13 (m, 2H), 7.02-6.93 (m, 2H), 3.34-3.19 (m, 1H), 2.67-2.51 (m, 2H), 1.30 (d, *J* = 7.0 Hz, 3H). The analytical data are consistent with the literature.<sup>10</sup>

(-)-3-(4-chlorophenyl)butanoic acid (**2i**)

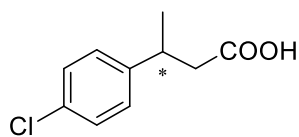

Purification by flash column chromatography (silica gel, PE : EA = 1 : 1) afforded the product as light yellow solid; 24.2 mg, yield: 98%; 95% ee;  $[\alpha]_{\text{D}}^{20} = -49.5$  ( $c = 1.2$ ,  $\text{CH}_2\text{Cl}_2$ ); SFC conditions (Lux 5u Amylose-3, column temperature: 37.0 °C,  $\text{MeOH}/\text{CO}_2 = 10/90$ , flow rate = 3.0 mL/min,  $\lambda = 210$  nm)  $t_{\text{R}} = 4.0$  min (minor), 4.2 min (major);  $^1\text{H}$  NMR (600 MHz, Chloroform-*d*)  $\delta$  7.28-7.25 (m, 2H), 7.17-7.13 (m, 2H), 3.28-3.21 (m, 1H), 2.66-2.54 (m, 2H), 1.30 (d,  $J = 7.0$  Hz, 3H). MP: 63-65 °C. The analytical data are consistent with the literature.<sup>1</sup>

(-)-3-(*o*-tolyl)butanoic acid (**2j**)

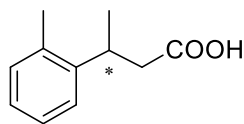

Purification by flash column chromatography (silica gel, PE : EA = 1 : 1) afforded the product as light yellow solid; 22.8 mg, yield: 98%; 97% ee;  $[\alpha]_{\text{D}}^{20} = -17.3$  ( $c = 1.1$ ,  $\text{CH}_2\text{Cl}_2$ ); SFC conditions (Lux 5u Cellulose-1, column temperature: 37.0 °C,  $\text{MeOH}/\text{CO}_2 = 5/95$ , flow rate = 3.0 mL/min,  $\lambda = 210$  nm)  $t_{\text{R}} = 4.6$  min (major), 7.5 min (minor);  $^1\text{H}$  NMR (600 MHz, Chloroform-*d*)  $\delta$  7.18 (d,  $J = 3.4$  Hz, 2H), 7.15 (d,  $J = 7.2$  Hz, 1H), 7.13-7.09 (m, 1H), 3.50-3.56 (m,  $J = 6.9$  Hz, 1H), 2.72-2.53 (m, 2H), 2.37 (s, 3H), 1.28 (d,  $J = 6.9$  Hz, 3H). MP: 40-42 °C. The analytical data are consistent with the literature.<sup>1</sup>

(-)-3-(*m*-tolyl)butanoic acid (**2k**)

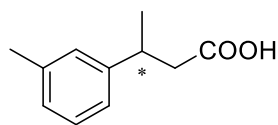

Purification by flash column chromatography (silica gel, PE : EA = 1 : 1) afforded the product as light yellow oil; 22.8 mg, yield: 98%; 98% ee;  $[\alpha]_{\text{D}}^{20} = -44.3$  ( $c = 1.1$ ,  $\text{CHCl}_3$ ); SFC conditions (Lux 5u Cellulose-1, column temperature: 37.0 °C,  $\text{MeOH}/\text{CO}_2 = 5/95$ , flow rate = 3.0 mL/min,  $\lambda = 210$  nm)  $t_{\text{R}} = 6.2$  min (minor), 6.9 min (major);  $^1\text{H}$  NMR (600 MHz, Chloroform-*d*)  $\delta$  7.19 (t,  $J = 7.4$  Hz, 1H), 7.03 (d,  $J = 8.0$  Hz, 3H), 3.30-3.18 (m, 1H), 2.74-2.49 (m, 2H), 2.34 (s, 3H), 1.31 (d,  $J = 6.8$  Hz, 3H). The analytical data are consistent with the literature.<sup>10</sup>

**(R)-3-(*p*-tolyl)butanoic acid (2l)**

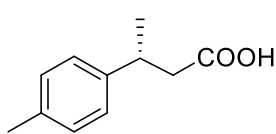

Purification by flash column chromatography (silica gel, PE : EA = 1 : 1) afforded the product as light yellow solid; 21.4 mg, yield: 96%; 98% ee;  $[\alpha]_{\text{D}}^{20} = -45.5$  ( $c = 1.2$ ,  $\text{CHCl}_3$ ); SFC conditions (Lux 5u Cellulose-4, column temperature: 37.0 °C,  $\text{MeOH}/\text{CO}_2 = 5/95$ , flow rate = 3.0 mL/min,  $\lambda = 210$  nm)  $t_{\text{R}} = 4.7$  min (minor), = 5.0 min (major);  $^1\text{H}$  NMR (400 MHz, Chloroform-*d*)  $\delta$  7.18-7.00 (m, 4H), 3.34-3.14 (m, 1H), 2.72-2.49 (m, 2H), 2.32 (s, 3H), 1.30 (d,  $J = 7.0$  Hz, 3H). MP: 97-99 °C. The absolute configuration of (*R*)-**2l** was determined by comparison with optical rotation data for the reported literature.<sup>11</sup>

**(-)-3-(naphthalen-2-yl)butanoic acid (2m)**

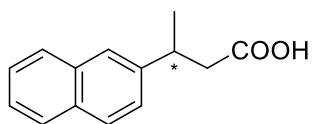

Purification by flash column chromatography (silica gel, PE : EA = 1 : 1) afforded the product as light yellow solid; 25.6 mg, yield: 96%; 93% ee;  $[\alpha]_{\text{D}}^{20} = -22.8$  ( $c = 1.3$ , ethanol); SFC conditions (Lux 5u Amylose-1, column temperature: 37.0 °C,  $\text{MeOH}/\text{CO}_2 = 15/85$ , flow rate = 3.0 mL/min,  $\lambda = 210$  nm)  $t_{\text{R}} = 3.7$  min (minor), 4.4 min (major);  $^1\text{H}$  NMR (400 MHz, Chloroform-*d*)  $\delta$  7.80 (d,  $J = 8.2$  Hz, 3H), 7.66 (s, 1H), 7.49-7.41 (m, 2H), 7.37 (d,  $J = 8.5$  Hz, 1H), 3.55-3.36 (m, 1H), 2.81-2.65 (m, 2H), 1.40 (d,  $J = 6.9$  Hz, 3H). MP: 109-111 °C. The analytical data are consistent with the literature.<sup>10</sup>

**(R)-3-phenylbutanoic acid (2n)**

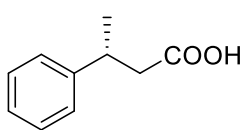

Purification by flash column chromatography (silica gel, PE : EA = 1 : 1) afforded the product as light yellow oil; 20.0 mg, yield: 98%; 98% ee;  $[\alpha]_{\text{D}}^{20} = -37.3$  ( $c = 1.0$ ,  $\text{CHCl}_3$ ); SFC conditions (Lux 5u Amylose-1, column temperature: 37.0 °C,  $\text{MeOH}/\text{CO}_2 = 5/95$ , flow rate = 3.0 mL/min,  $\lambda = 210$  nm)  $t_{\text{R}} = 3.6$  min (minor), 4.0 min (major);  $^1\text{H}$  NMR (400 MHz, Chloroform-*d*)  $\delta$  7.36-7.26 (m, 2H), 7.25-7.15 (m, 3H), 3.27 (h,  $J = 7.0$  Hz, 1H), 2.85-2.43 (m, 2H), 1.32 (d,  $J = 6.9$  Hz, 3H). The absolute configuration of (*R*)-**2n** was determined by comparison with optical rotation data for the reported literature.<sup>12</sup>

*(R)*-3-phenylpentanoic acid (**2o**)

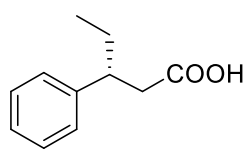

Purification by flash column chromatography (silica gel, PE : EA = 1 : 1) afforded the product as light yellow oil; 21.4 mg, yield: 97%; 98% ee;  $[\alpha]_D^{20} = -29.5$  ( $c = 1.1$ ,  $\text{CH}_2\text{Cl}_2$ ); SFC conditions (Lux 5u Amylose-1, column temperature: 37.0 °C, MeOH/CO<sub>2</sub> = 5/95, flow rate = 3.0 mL/min,  $\lambda = 210$  nm)  $t_R = 3.2$  min (minor), 3.7 min (major); <sup>1</sup>H NMR (600 MHz, Chloroform-*d*)  $\delta$  10.69 (s, 1H), 7.28 (t,  $J = 7.4$  Hz, 2H), 7.19 (dd,  $J = 17.3, 7.4$  Hz, 3H), 3.03-2.92 (m, 1H), 2.72-2.50 (m, 2H), 1.82-1.68 (m, 1H), 1.66-1.53 (m, 1H), 0.79 (t,  $J = 7.2$  Hz, 3H). The absolute configuration of *(R)*-**2o** was determined by comparison with optical rotation data for the reported literature.<sup>1</sup>

*(S)*-4-methyl-3-phenylpentanoic acid (**2p**)

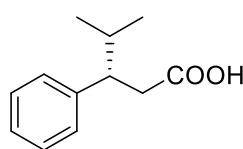

Purification by flash column chromatography (silica gel, PE : EA = 1 : 1) afforded the product as light yellow oil; 23.5 mg, yield: 98%; 99% ee;  $[\alpha]_D^{20} = -32.3$  ( $c = 1.2$ ,  $\text{CH}_2\text{Cl}_2$ ); SFC conditions (Lux 5u Cellulose-1, column temperature: 37.0 °C, MeOH/CO<sub>2</sub> = 10/90, flow rate = 3.0 mL/min,  $\lambda = 210$  nm)  $t_R = 2.1$  min (major), 2.3 min (minor); <sup>1</sup>H NMR (600 MHz, Chloroform-*d*)  $\delta$  7.27-7.21 (m, 2H), 7.18 (t,  $J = 7.2$  Hz, 1H), 7.12 (d,  $J = 7.3$  Hz, 2H), 2.89-2.83 (m, 1H), 2.81-2.74 (m, 1H), 2.67-2.55 (m, 1H), 1.91-1.79 (m, 1H), 0.92 (d,  $J = 6.5$  Hz, 3H), 0.74 (d,  $J = 6.6$  Hz, 3H). The absolute configuration of *(S)*-**2p** was determined by comparison with optical rotation data for the reported literature.<sup>1</sup>

*(S)*-3-cyclohexyl-3-phenylpropanoic acid (**2q**)

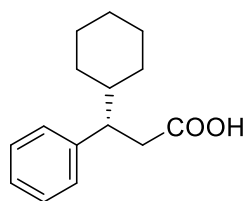

Purification by flash column chromatography (silica gel, PE : EA = 1 : 1) afforded the product as light yellow soild; 28.0 mg, yield: 97%; 99% ee;  $[\alpha]_D^{20} = -56.6$  ( $c = 1.4$ ,  $\text{CH}_2\text{Cl}_2$ ); SFC conditions (Lux 5u Cellulose-4, column temperature: 37.0 °C, MeOH/CO<sub>2</sub> = 10/90, flow rate = 3.0 mL/min,  $\lambda = 210$  nm)  $t_R = 3.9$  min (minor), 5.0 min (major); <sup>1</sup>H NMR (600 MHz, Chloroform-*d*)  $\delta$  7.28-7.24 (m, 2H), 7.21-7.17 (m, 1H), 7.14-7.09 (m, 2H), 2.90-2.85 (m, 1H), 2.84-2.78 (m, 1H), 2.61-2.54 (m, 1H), 1.82-1.71 (m, 2H), 1.65-1.57 (m, 2H), 1.49-1.41 (m, 2H), 1.26-1.18 (m, 1H), 1.14-1.03 (m, 2H), 0.97-0.90 (m, 1H), 0.83-0.75 (m, 1H). MP: 90-92 °C. The absolute configuration of *(S)*-**2q** was

determined by comparison with optical rotation data for the reported literature.<sup>1</sup>

*(S)*-3-phenylpentanoic acid (**2r**)

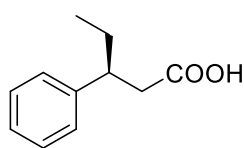

Purification by flash column chromatography (silica gel, PE : EA = 1 : 1) afforded the product as light yellow oil; 21.6 mg, yield: 97%; 91% ee;  $[\alpha]_{\text{D}}^{20} = +20.5$  ( $c = 1.1$ ,  $\text{CH}_2\text{Cl}_2$ ); SFC conditions (Lux 5u Amylose-1, column temperature: 37.0 °C, MeOH/CO<sub>2</sub> = 5/95, flow rate = 3.0 mL/min,  $\lambda = 210$  nm)  $t_{\text{R}} = 3.1$  min (major), 3.5 min (minor); <sup>1</sup>H NMR (600 MHz, Chloroform-*d*)  $\delta$  10.69 (s, 1H), 7.28 (t,  $J = 7.4$  Hz, 2H), 7.19 (dd,  $J = 17.3, 7.4$  Hz, 3H), 3.03-2.92 (m, 1H), 2.72-2.50 (m, 2H), 1.82-1.68 (m, 1H), 1.66-1.53 (m, 1H), 0.79 (t,  $J = 7.2$  Hz, 3H). The absolute configuration of *(S)*-**2r** was determined by comparison with optical rotation data for the reported literature.<sup>1</sup>

*(R)*-3-phenylpentanoic acid (**2s**)

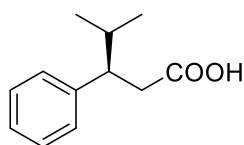

Purification by flash column chromatography (silica gel, PE : EA = 1 : 1) afforded the product as light yellow oil; 23.0 mg, yield: 96%; 90% ee;  $[\alpha]_{\text{D}}^{20} = +21.3$  ( $c = 1.0$ ,  $\text{CH}_2\text{Cl}_2$ ); SFC conditions (Lux 5u Cellulose-1, column temperature: 37.0 °C, MeOH/CO<sub>2</sub> = 10/90, flow rate = 3.0 mL/min,  $\lambda = 210$  nm)  $t_{\text{R}} = 2.9$  min (minor), 3.2 min (major); <sup>1</sup>H NMR (600 MHz, Chloroform-*d*)  $\delta$  7.27-7.21 (m, 2H), 7.18 (t,  $J = 7.2$  Hz, 1H), 7.12 (d,  $J = 7.3$  Hz, 2H), 2.89-2.83 (m, 1H), 2.81-2.74 (m, 1H), 2.67-2.55 (m, 1H), 1.91-1.79 (m, 1H), 0.92 (d,  $J = 6.5$  Hz, 3H), 0.74 (d,  $J = 6.6$  Hz, 3H). The absolute configuration of *(R)*-**2s** was determined by comparison with optical rotation data for the reported literature.<sup>1</sup>

*(-)*-3-phenyl-3-(*o*-tolyl)propanoic acid (**2t**)

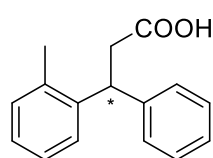

Purification by flash column chromatography (silica gel, PE : EA = 1 : 1) afforded the product as light yellow solid; 29.1 mg, yield: 97%; 83% ee;  $[\alpha]_{\text{D}}^{20} = -15.7$  ( $c = 1.5$ ,  $\text{CH}_2\text{Cl}_2$ ); SFC conditions (Lux 5u Cellulose-4, column temperature: 37.0 °C, MeOH/CO<sub>2</sub> = 10/90, flow rate = 3.0 mL/min,  $\lambda = 210$  nm)  $t_{\text{R}} = 3.1$  min (minor), 4.0 min (major); <sup>1</sup>H NMR (600 MHz, Chloroform-*d*)  $\delta$  7.26 (d,  $J = 5.2$  Hz, 6H), 7.22-7.15 (m, 4H), 7.16-7.11 (m, 2H), 4.72 (t,  $J = 7.9$  Hz, 1H), 3.12-3.01 (m, 2H), 2.28 (s, 3H). MP: 121-123 °C. The analytical data are consistent with the literature.<sup>13</sup>

(+)-3-phenyl-3-(*o*-tolyl)propanoic acid (**2u**)

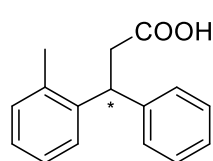

Purification by flash column chromatography (silica gel, PE : EA = 1 : 1) afforded the product as light yellow solid; 29.3 mg, yield: 98%; 79% ee;  $[\alpha]_{\text{D}}^{20} = +14.3$  ( $c = 1.5$ ,  $\text{CH}_2\text{Cl}_2$ ); SFC conditions (Lux 5u Cellulose-4, column temperature: 37.0 °C,  $\text{MeOH}/\text{CO}_2 = 10/90$ , flow rate = 3.0 mL/min,  $l = 210$  nm)  $t_{\text{R}} = 3.4$  min (major), 4.5 min (minor);  $^1\text{H NMR}$  (600 MHz, Chloroform-*d*)  $\delta$  7.26 (d,  $J = 5.2$  Hz, 6H), 7.22-7.15 (m, 4H), 7.16-7.11 (m, 2H), 4.72 (t,  $J = 7.9$  Hz, 1H), 3.12-3.01 (m, 2H), 2.28 (s, 3H). MP: 121-123 °C. The analytical data are consistent with the literature.<sup>13</sup>

(-)-ethyl 3-(2-fluorophenyl)butanoate (**2v**)

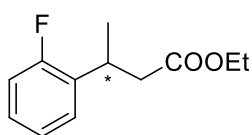

Purification by flash column chromatography (silica gel, PE : EA = 20 : 1) afforded the product as light yellow oil; 25.2 mg, yield: 96%; 98% ee;  $[\alpha]_{\text{D}}^{20} = -22.7$  ( $c = 1.3$ ,  $\text{CH}_2\text{Cl}_2$ ); HPLC conditions (Lux 5u Cellulose-3, ipa/hex = 10/90, flow rate = 1.0 mL/min,  $l = 210$  nm)  $t_{\text{R}} = 4.3$  min (major), 4.6 min (minor);  $^1\text{H NMR}$  (400 MHz, Chloroform-*d*)  $\delta$  7.25-7.13 (m, 2H), 7.11-7.04 (m, 1H), 7.03-6.97 (m, 1H), 4.08 (q,  $J = 7.1$  Hz, 2H), 3.63-3.48 (m, 1H), 2.74-2.52 (m, 2H), 1.32 (d,  $J = 7.0$  Hz, 3H), 1.18 (t,  $J = 7.1$  Hz, 3H). The analytical data are consistent with the literature.<sup>14</sup>

**6. Procedure for the synthesis of compounds 3, 4 and 5.**

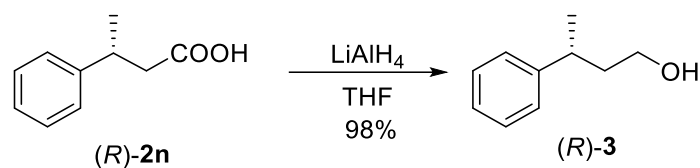

Under  $\text{N}_2$  atmosphere,  $\text{LiAlH}_4$  (57 mg, 1.5 mmol, 3.0 eq) was added into a solution of (*R*)-**2n** (82 mg, 0.5 mmol, 1.0 eq) in THF (10 mL) at 0 °C. After stirring at room temperature until no starting material was detected by TLC, the reaction was quenched by adding water slowly. The mixture was acidified with 2 M  $\text{HCl}_{\text{aq}}$ , and was extracted with EtOAc ( $3 \times 50$  mL) and then dried over anhydrous  $\text{Na}_2\text{SO}_4$ . The solvent was evaporated under vacuum, and the residue was purified by column chromatography on silica gel using EtOAc/petroleum ether (1:10 to 1:5) as the eluent giving the (*R*)-3-phenylbutan-1-ol (**3**) as a colorless oil (73 mg, yield: 98%).<sup>15</sup>



*(R)*-3-phenylbutan-1-ol (**3**)

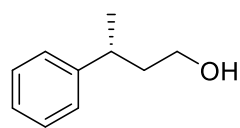

Purification by flash column chromatography (silica gel, PE : EA = 10:1 to 5:1) afforded the product as colorless oil; 73 mg, yield: 98%; 98% ee;  $[\alpha]_D^{20} = -32.3$  ( $c = 1.5$ ,  $\text{CHCl}_3$ ); SFC conditions (Lux 5u Amylose-1, column temperature: 37.0 °C, MeOH/CO<sub>2</sub> = 10/90, flow rate = 3.0 mL/min,  $\lambda = 210$  nm)  $t_R = 6.5$  min (major), 7.5 min (minor); <sup>1</sup>H NMR (400 MHz, Chloroform-*d*)  $\delta$  7.34-7.28 (m, 2H), 7.23-7.15 (m, 3H), 3.66-3.46 (m, 2H), 2.97-2.81 (m, 1H), 1.86 (q,  $J = 6.9$  Hz, 2H), 1.28 (d,  $J = 7.0$  Hz, 3H). The absolute configuration of *(R)*-**3** was determined by comparison with optical rotation data for the reported literature.<sup>16</sup>

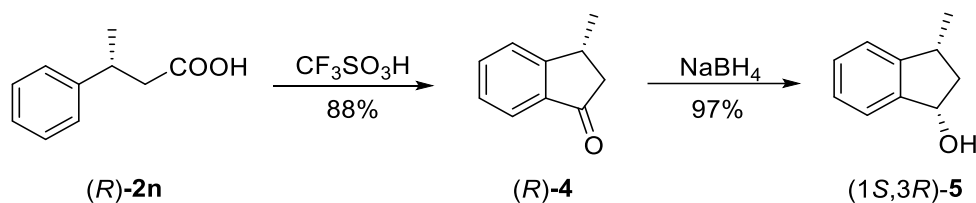

*(R)*-**2n** (82 mg, 0.5 mmol, 1.0 eq) was dissolved in triflic acid (1 mL) and the solution was stirred for 12 h at 70 °C in an oil bath. After the reaction was complete, the solution was poured over water (5 mL) and extracted with EtOAc (3 × 15 mL). The organic extracts were combined, washed with brine, and dried over anhydrous Na<sub>2</sub>SO<sub>4</sub>. The solvent was removed by vacuum evaporation, and crude product was purified by column chromatography on silica gel using EtOAc/petroleum ether (1:20) as eluent giving the *(R)*-**4** as a colorless oil (64 mg, yield: 88%).<sup>15</sup>

NaBH<sub>4</sub> (37 mg, 1 mmol, 3.3 eq) was added to a solution of *(R)*-**4** (44 mg, 0.3 mmol, 1.0 eq) in methanol (5 mL) at 0 °C. The reaction mixture was stirred for another 30 min until no starting material was detected by TLC, after which the volatiles were removed in vacuo and the residue slowly acidified with 2 M HCl<sub>aq</sub>. The product was extracted with EtOAc (3 × 15 mL), dried over Na<sub>2</sub>SO<sub>4</sub> and concentrated in vacuo. The crude product was purified by column chromatography on silica gel using EtOAc/petroleum ether (1:5) as eluent giving the **5** as a colorless solid (44 mg, yield: 97%).<sup>17</sup>

*(R)*-3-methyl-2,3-dihydro-1*H*-inden-1-one (**4**)

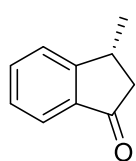

Purification by flash column chromatography (silica gel, PE : EA = 20 : 1) afforded the product as colorless oil; 64 mg, yield: 88%; 97% ee;  $[\alpha]_D^{20} = -13.7$  ( $c = 1.5$ ,  $\text{CHCl}_3$ ); HPLC conditions (Lux 5u Cellulose-1, ipa/hex = 5/95, flow rate = 1.0 mL/min,  $\lambda = 210$  nm)  $t_R = 9.8$  min (minor), 10.3 min (major);  $^1\text{H}$  NMR (600 MHz, Chloroform-*d*)  $\delta$  7.73 (d,  $J = 7.6$  Hz, 1H), 7.65-7.57 (m, 1H), 7.53-7.49 (m, 1H), 7.40-7.34 (m, 1H), 3.49-3.42 (m, 1H), 2.96 (dd,  $J = 19.0$ , 7.5 Hz, 1H), 2.30 (dd,  $J = 19.0$ , 3.5 Hz, 1H), 1.41 (d,  $J = 7.2$  Hz, 3H). The absolute configuration of *(R)*-**4** was determined by comparison with optical rotation data for the reported literature.<sup>18</sup>

*(1S,3R)*-3-methyl-2,3-dihydro-1*H*-inden-1-ol (**5**)

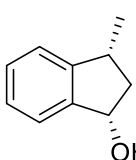

Purification by flash column chromatography (silica gel, PE : EA = 5 : 1) afforded the product as colorless solid; 43.0 mg, yield: 97%; 94:6 dr, 94% ee;  $[\alpha]_D^{20} = +12.5$  ( $c = 1.2$ ,  $\text{CH}_2\text{Cl}_2$ ); GC conditions: Supelco Alpha Dex<sup>TM</sup> 120 column (30 m  $\times$  0.25 mm  $\times$  0.25  $\mu\text{m}$ ),  $\text{N}_2$  1.0 mL/min, programmed 75  $^\circ\text{C}$  - 0.1  $^\circ\text{C}/\text{min}$  - 200  $^\circ\text{C}$  (hold 50 min);  $t_R = 28.1$  min (major), 29.1 min (minor);  $^1\text{H}$  NMR (600 MHz, Chloroform-*d*; *cis* isomer)  $\delta$  7.41 (d,  $J = 7.3$  Hz, 1H), 7.32-7.26 (m, 2H), 7.23 (d,  $J = 7.1$  Hz, 1H), 5.19 (t,  $J = 7.3$  Hz, 1H), 3.03-3.08 (m, 1H), 2.79-2.75 (m, 1H), 1.78 (s, 1H), 1.49-1.45 (m, 1H), 1.37 (d,  $J = 6.9$  Hz, 3H). M.P. = 74-76  $^\circ\text{C}$ . The absolute configuration of *(1S,3R)*-**5** was determined by comparison with optical rotation data for the reported literature.<sup>17</sup>

**7. General procedure for the synthesis of **8**.**

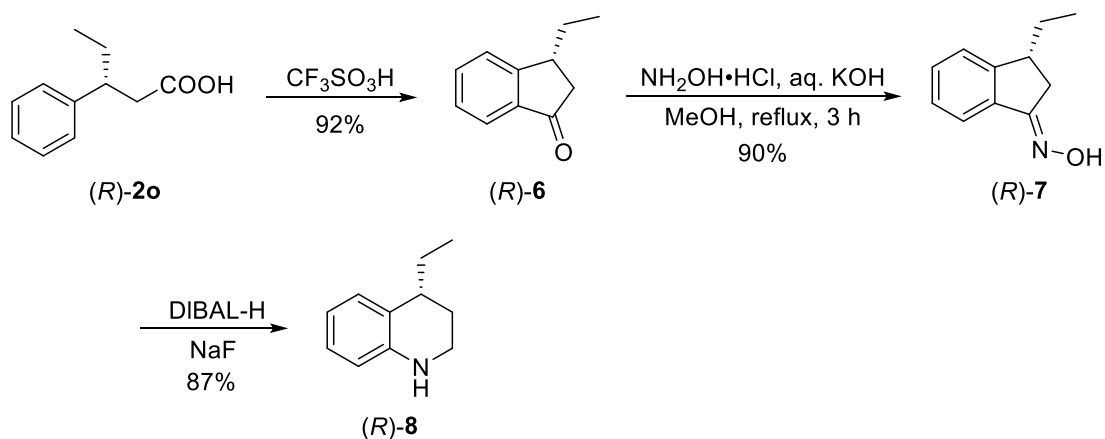

(*R*)-**2o** (267 mg, 1.5 mmol, 1.0 eq) was dissolved in triflic acid (3 mL) and the solution was stirred for 12 h at 70 °C in an oil bath. After the reaction was complete, the solution was poured over water (15 mL) and extracted with EtOAc (3 × 20 mL). The organic extracts were combined, washed with brine, and dried over anhydrous Na<sub>2</sub>SO<sub>4</sub>. The solvent was removed by vacuum evaporation, and crude product was purified by column chromatography on silica gel using EtOAc/petroleum ether (1:20) as eluent giving the (*R*)-**6** as a colorless oil (220 mg, yield: 92%).<sup>19</sup>

To a solution of (*R*)-**6** (160 mg, 1.0 mmol, 1.0 eq) in methanol (5.0 mL) was added hydroxylamine hydrochloride (103 mg, 1.5 mmol, 1.5 eq) and aq. KOH (50%, 0.34 mL, 3.0 mmol, 3.0 eq). The mixture was refluxed in an oil bath for 3 h when TLC indicated complete conversion. After cooling to room temperature, the residue slowly neutralized with 2 M HCl<sub>aq</sub>. The product was extracted with EtOAc (3 × 15 mL), dried over Na<sub>2</sub>SO<sub>4</sub> and concentrated in vacuo. The crude product was purified by column chromatography on silica gel using EtOAc/petroleum ether (1:5) as eluent giving the (*R*)-**7** as a pale yellow solid (157 mg, yield: 90%).<sup>19</sup>

To a stirred solution of (*R*)-**7** (87 mg, 0.5 mmol, 1.0 eq) in anhydrous CH<sub>2</sub>Cl<sub>2</sub> (56.0 mL) was added DIBAL-H (3.0 mL, 3.0 mmol, 6.0 eq, 1.0 M in *n*-hexane) at 0 °C under an argon atmosphere. The solution was stirred for 2 h at room temperature. NaF powder (0.6 g, 15 mmol, 30.0 eq) and water (0.5 mL) were added at 0 °C, and the resulting mixture was stirred for 30 min. The desired solution was then filtered through a pad of celite, followed by addition of Na<sub>2</sub>SO<sub>4</sub> to remove water. The organic solutions were evaporated to give the crude product. Purification by column chromatography on a silica gel (EtOAc: petroleum ether = 1:3) yielded (*R*)-**8** (70 mg, yield: 87%).<sup>20</sup>

(*R*)-3-ethyl-2,3-dihydro-1*H*-inden-1-one (**6**)

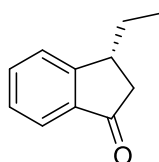

Purification by flash column chromatography (silica gel, PE : EA = 20 :

1) afforded the product as colorless oil; 220.0 mg, yield: 92%; 98% ee;

[ $\alpha$ ]<sub>D</sub><sup>20</sup> = -20.2 (c = 1.4, ethanol); HPLC conditions (Lux 5u Cellulose-1,

ipa/hex = 5/95, flow rate = 1.0 mL/min,  $\lambda$  = 210 nm)  $t_R$  = 6.1 min (minor), 6.3 min (major); <sup>1</sup>H NMR (400 MHz, Chloroform-*d*)  $\delta$  7.74 (d,  $J$  = 7.7 Hz, 1H), 7.63-7.57 (m, 1H), 7.51 (d,  $J$  = 7.7 Hz, 1H), 7.38 (t,  $J$  = 7.4 Hz, 1H), 3.37-3.29 (m, 1H), 2.85 (dd,  $J$  =

19.1, 7.5 Hz, 1H), 2.37 (dd,  $J = 19.1, 3.3$  Hz, 1H), 2.03-1.92 (m, 1H), 1.60-1.51 (m, 1H), 0.98 (t,  $J = 7.4$  Hz, 3H). The absolute configuration of (*R*)-**6** was determined by comparison with optical rotation data for the reported literature.<sup>19</sup>

(*R*)-3-ethyl-2,3-dihydro-1*H*-inden-1-one oxime (**7**)

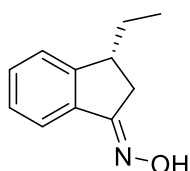

Purification by flash column chromatography (silica gel, PE : EA = 5 : 1) afforded the product as pale yellow solid; 157.0 mg, yield: 90%; 92% ee;  $[\alpha]_{\text{D}}^{20} = +17.1$  ( $c = 1.3$ , ethanol); SFC conditions (Lux 5u Cellulose-1, column temperature: 37.0 °C, MeOH/CO<sub>2</sub> = 10/90, flow rate = 3.0 mL/min,  $\lambda = 210$  nm)  $t_{\text{R}} = 3.5$  min (minor), 4.0 min (major); <sup>1</sup>H NMR (400 MHz, Chloroform-*d*) <sup>1</sup>H NMR (600 MHz, Chloroform-*d*)  $\delta$  7.67 (d,  $J = 7.7$  Hz, 1H), 7.40-7.36 (m, 1H), 7.33 (d,  $J = 7.6$  Hz, 1H), 7.29-7.26 (m, 1H), 3.28-3.22 (m, 1H), 3.19-3.13 (m, 1H), 2.67-2.61 (m, 1H), 1.94-1.87 (m, 1H), 1.54-1.47 (m, 1H), 0.99 (t,  $J = 7.4$  Hz, 3H). M.P. = 81-83 °C. The absolute configuration of (*R*)-**7** was determined by comparison with optical rotation data for the reported literature.<sup>19</sup>

(*R*)-4-ethyl-1,2,3,4-tetrahydroquinoline (**8**)

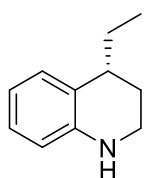

Purification by flash column chromatography (silica gel, PE : EA = 3 : 1) afforded the product as colorless oil; 70.0 mg, yield: 87%; 90% ee;  $[\alpha]_{\text{D}}^{20} = +28.3$  ( $c = 1.5$ , ethanol); SFC conditions (Lux 5u Cellulose-3, column temperature: 37.0 °C, MeOH/CO<sub>2</sub> = 10/90, flow rate = 3.0 mL/min,  $\lambda = 210$  nm)  $t_{\text{R}} = 4.5$  min (major), 5.1 min (minor); <sup>1</sup>H NMR (600 MHz, Chloroform-*d*)  $\delta$  7.03 (d,  $J = 7.5$  Hz, 1H), 6.97 (t,  $J = 7.6$  Hz, 1H), 6.63 (t,  $J = 7.4$  Hz, 1H), 6.48 (d,  $J = 7.9$  Hz, 1H), 3.86 (s, 1H), 3.35-3.30 (m, 1H), 3.28-3.24 (m, 1H), 2.68-2.63 (m, 1H), 1.96-1.90 (m, 1H), 1.85-1.81 (m, 1H), 1.78-1.73 (m, 1H), 1.58-1.52 (m, 1H), 1.00 (t,  $J = 7.4$  Hz, 3H). The absolute configuration of (*R*)-**8** was determined by comparison with optical rotation data for the reported literature.<sup>19</sup>

**8. Deuterium labelling studies.**

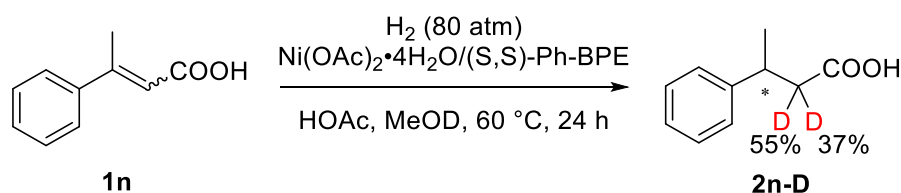

A stock solution was made by mixing Ni(OAc)<sub>2</sub>·H<sub>2</sub>O with (*S,S*)-Ph-BPE in a 5 : 5.1 molar ratio in deuterated methanol (1.0 mL) at room temperature for 12 hours in a nitrogen-filled glovebox. The catalyst solution was transferred by syringe into the vial charged with substrate (0.125 mmol) and added additive HOAc. The vial were subsequently transferred into an autoclave which hydrogen gas was charged. The reaction was then stirred under H<sub>2</sub> (80 atm) at 60 °C for 24 h. The hydrogen gas was released slowly and carefully. The solution was passed through a short column of silica gel to remove the metal complex. The conversion of products were determined by <sup>1</sup>H NMR analysis. <sup>1</sup>H NMR (600 MHz, Chloroform-*d*) δ 7.31-7.28 (m, 2H), 7.23-7.19 (m, 3H), 3.26 (p, *J* = 7.2 Hz, 1H), 2.67-2.62 (m, 0.44H), 2.57-2.54 (m, 0.63H), 1.31 (d, *J* = 7.0 Hz, 3H).

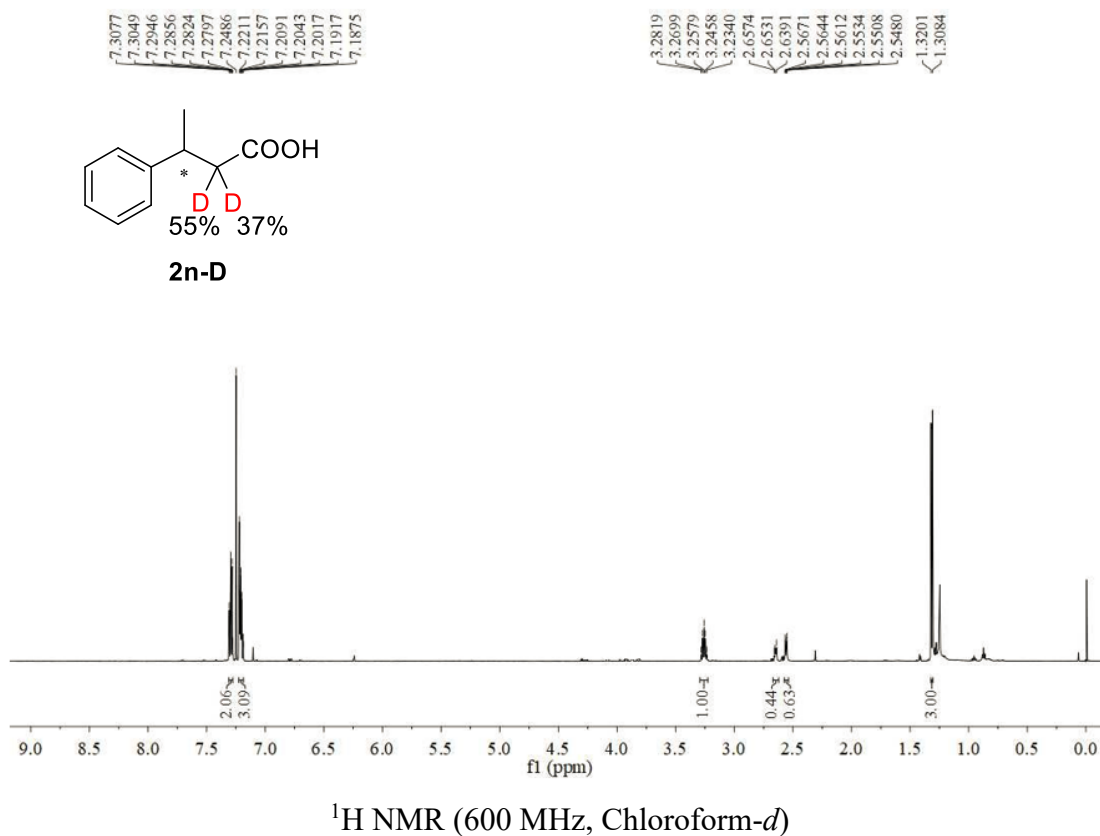

## 9. References

1. Yan, Q.; Kong, D.; Zhao, W.; Zi, G.; Hou, G. Enantioselective Hydrogenation of  $\beta$ ,  $\beta$ -Disubstituted Unsaturated Carboxylic Acids under Base-Free Conditions. *J. Org. Chem.* **2016**, *81*, 2070-2077.
2. Wiley, R. H.; Van der Plas, H. C. *Cis-trans* isomers of methyl substituted fluorocinnamic and 5-[*o* (*m* and *p*)-fluorophenyl]pentadienoic acids. *J. Chem. Eng. Data* **1965**, *10*, 72-73.
3. Jia, W.-Q.; Zhang, H.-M.; Zhang, C.-L.; Gao, Z.-H.; Ye, S. *N*-Heterocyclic carbene-catalyzed [4+2] annulation of  $\alpha$ ,  $\beta$ -unsaturated carboxylic acids: enantioselective synthesis of dihydropyridinones and spirocyclic oxindolodihydropyridinones. *Org. Chem. Front.* **2016**, *3*, 77-81.
4. Edwards, P. D.; Albert, J. S.; Sylvester, M.; Aharony, D.; Andisik, D.; Callaghan, O.; Campbell, J. B.; Carr, R. A.; Chessari, G.; Congreve, M.; Frederickson, M.; Folmer, R. H. A.; Geschwindner, S.; Koether, G.; Kolmodin, K.; Krumrine, J.; Mauger, R. C.; Murray, C. W.; Olsson, L.-L.; Patel, S.; Spear, N.; Tian, G. Application of fragment-based lead generation to the discovery of novel, cyclic amidine  $\beta$ -secretase inhibitors with nanomolar potency, cellular activity, and high ligand efficiency. *J. Med. Chem.* **2007**, *50*, 5912-5925.
5. Yin, J.; Li, Y.; Zhang, R.; Jin, K.; Duan, C. Copper/silver-mediated decarboxylative trifluoromethylation of  $\alpha$ ,  $\beta$ -unsaturated carboxylic acids with  $\text{CF}_3\text{SO}_2\text{Na}$ . *Synthesis* **2014**, *46*, 607-612.
6. Claraso, C.; Vicens, L.; Polo, A.; Costas, M. Enantioselective Epoxidation of  $\beta$ ,  $\beta$ -Disubstituted Enamides with a Manganese Catalyst and Aqueous Hydrogen Peroxide. *Org. Lett.* **2019**, *21*, 2430-2435.
7. Metternich, J. B.; Gilmour, R. One Photocatalyst, n Activation Modes Strategy for Cascade Catalysis: Emulating Coumarin Biosynthesis with (-)-Riboflavin. *J. Am. Chem. Soc.* **2016**, *138*, 1040-1045.
8. Jalander, L.; Broms, M. Synthesis of  $\gamma$ -lactones and 3-alkylidene-1-indanones. *Acta Chem. Scand., Ser. B* **1982**, *B36*, 371-375.
9. Metternich, J. B.; Gilmour, R. A Bio-Inspired, Catalytic *E*→*Z* Isomerization of

- Activated Olefins. *J. Am. Chem. Soc.* **2015**, *137*, 11254-11257.
10. Sun, X.; Zhou, L.; Wang, C.-J.; Zhang, X. Rh-catalyzed highly enantioselective synthesis of 3-arylbutanoic acids. *Angew. Chem., Int. Ed.* **2007**, *46*, 2623-2626.
11. Li, P.; Hu, X.; Dong, X.-Q.; Zhang, X. Rhodium/bisphosphine-thiourea-catalyzed enantioselective hydrogenation of  $\alpha$ ,  $\beta$ -unsaturated *N*-acylpyrazoles. *Chem. Commun.* **2016**, *52*, 11677-11680.
12. Dong, K.; Li, Y.; Wang, Z.; Ding, K. Asymmetric hydrogenation of  $\alpha$ -arylacrylic and  $\beta$ -arylbut-3-enoic acids catalyzed by Rh(I) complex of a monodentate secondary phosphine oxide ligand. *Org. Chem. Front.* **2014**, *1*, 155-160.
13. Hillier, M. C.; Desrosiers, J.-N.; Marcoux, J.-F.; Grabowski, E. J. J. Stereoselective carbon-carbon bond formation *via* the Mitsunobu displacement of chiral secondary benzylic alcohols. *Org. Lett.* **2004**, *6*, 573-576.
14. Romanov-Michailidis, F.; Pupier, M.; Guenee, L.; Alexakis, A. Enantioselective halogenative semi-pinacol rearrangement: a stereodivergent reaction on a racemic mixture. *Chem. Commun.* **2014**, *50*, 13461-13464.
15. Dong, K.; Li, Y.; Wang, Z.; Ding, K. Catalytic Asymmetric Hydrogenation of  $\alpha$ -CF<sub>3</sub>- or  $\beta$ -CF<sub>3</sub>-Substituted Acrylic Acids using Rhodium(I) Complexes with a Combination of Chiral and Achiral Ligands. *Angew. Chem., Int. Ed.* **2013**, *52*, 14191-14195.
16. Cabre, A.; Rafael, S.; Sciortino, G.; Ujaque, G.; Verdaguer, X.; Lledos, A.; Riera, A. Catalytic Regioselective Isomerization of 2,2-Disubstituted Oxetanes to Homoallylic Alcohols. *Angew. Chem., Int. Ed.* **2020**, *59*, 7521-7527.
17. Arp, F. O.; Fu, G. C. Catalytic enantioselective Negishi reactions of racemic secondary benzylic halides. *J. Am. Chem. Soc.* **2005**, *127*, 10482-10483.
18. Yang, J.; Yoshikai, N. Cobalt-catalyzed enantioselective intramolecular hydroacylation of ketones and olefins. *J. Am. Chem. Soc.* **2014**, *136*, 16748-16751.
19. Mani, N. S.; Wu, M. An efficient synthetic route to chiral 4-alkyl-1,2,3,4-tetrahydroquinolines: enantioselective synthesis of (*R*)-4-ethyl-1,2,3,4-tetrahydroquinoline. *Tetrahedron: Asymmetry* **2000**, *11*, 4687-4691.
20. Cho, H.; Iwama, Y.; Sugimoto, K.; Mori, S.; Tokuyama, H. Regioselective

Synthesis of Heterocycles Containing Nitrogen Neighboring an Aromatic Ring by Reductive Ring Expansion using Diisobutylaluminum Hydride and Studies on the Reaction Mechanism. *J. Org. Chem.* **2010**, *75*, 627-636.



## 10. NMR, SFC and HPLC spectra

### (*E*)-3-(2-fluorophenyl)but-2-enoic acid (**1a**)

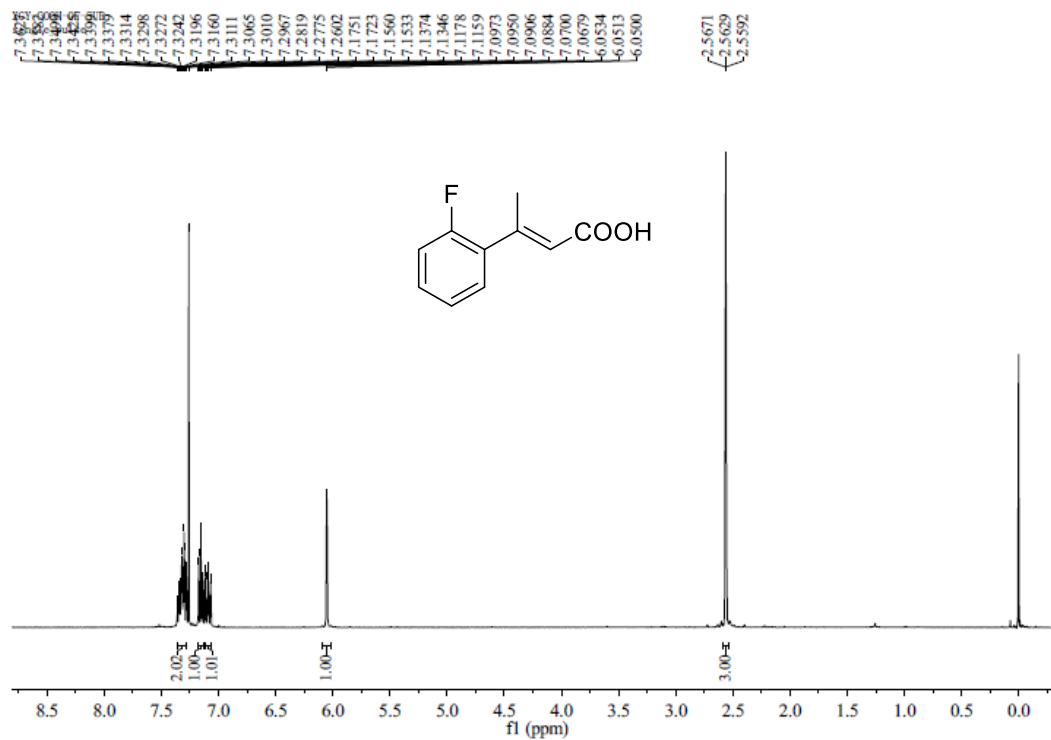

<sup>1</sup>H NMR (400 MHz, Chloroform-*d*)

### (*Z*)-3-(2-fluorophenyl)but-2-enoic acid (**1b**)

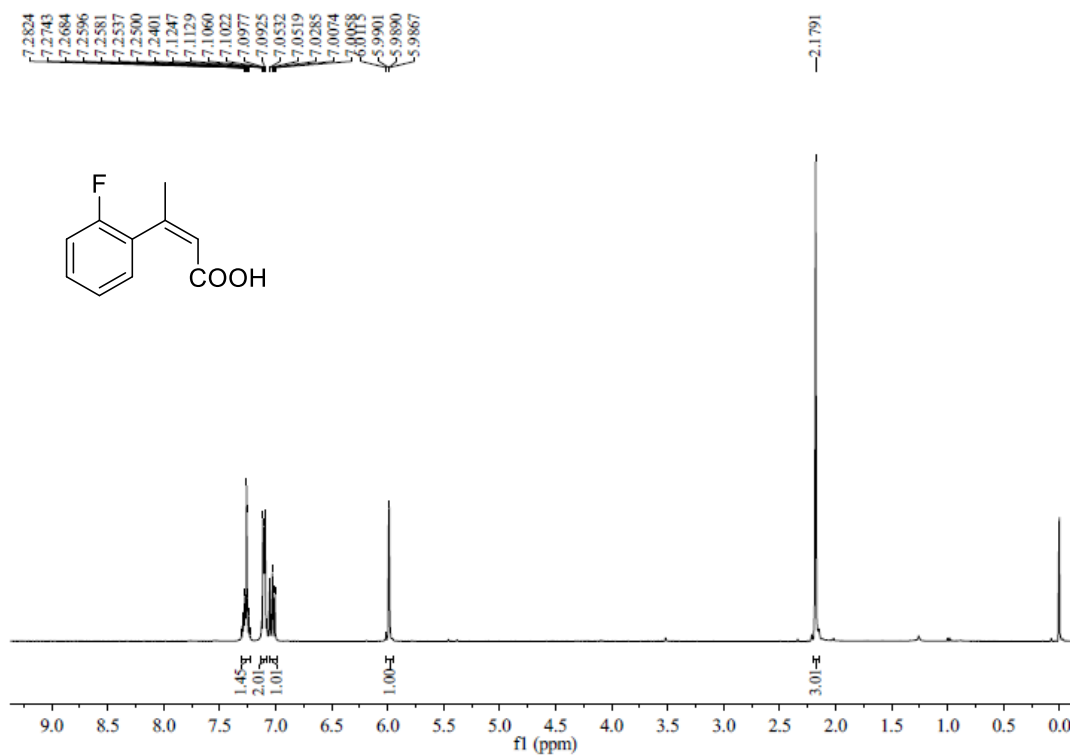

<sup>1</sup>H NMR (400 MHz, Chloroform-*d*)

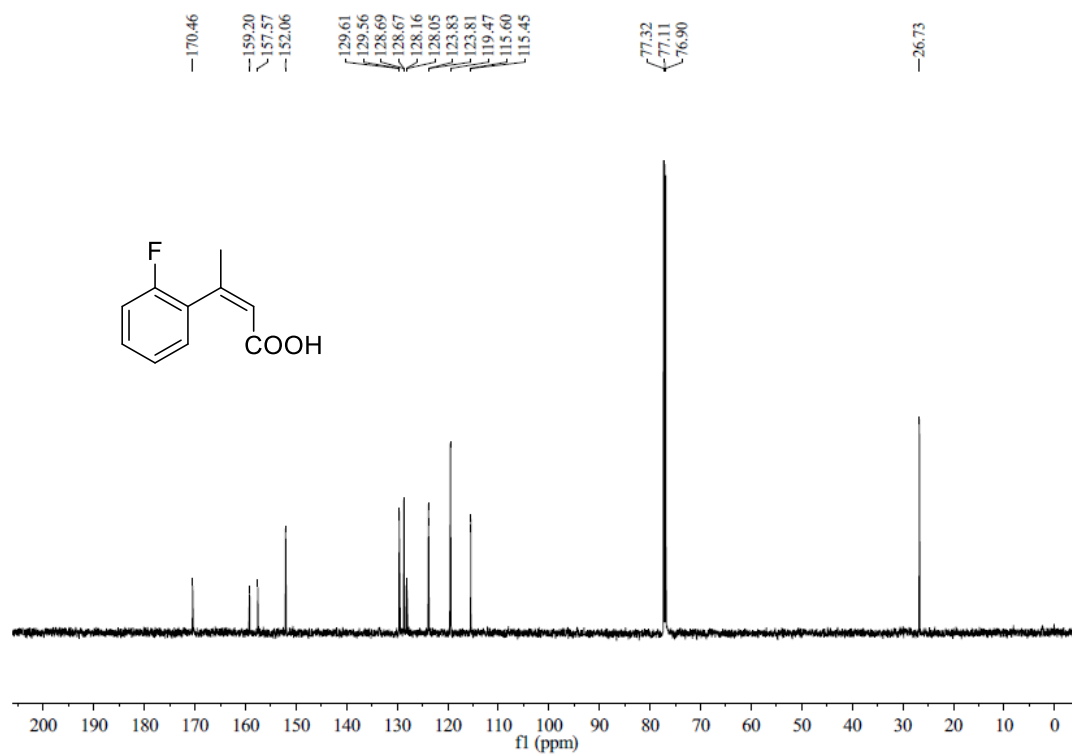

<sup>13</sup>C NMR (150 MHz, Chloroform-*d*)

(*Z*)-3-(2-chlorophenyl)but-2-enoic acid (**1c**)

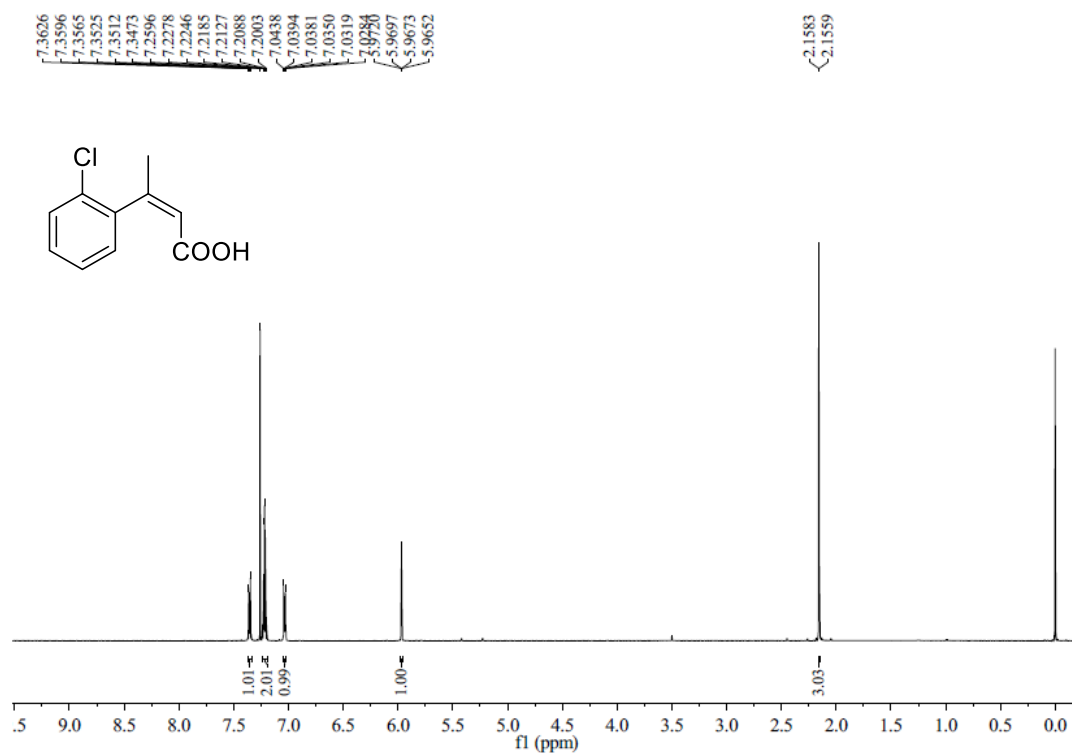

<sup>1</sup>H NMR (600 MHz, Chloroform-*d*)

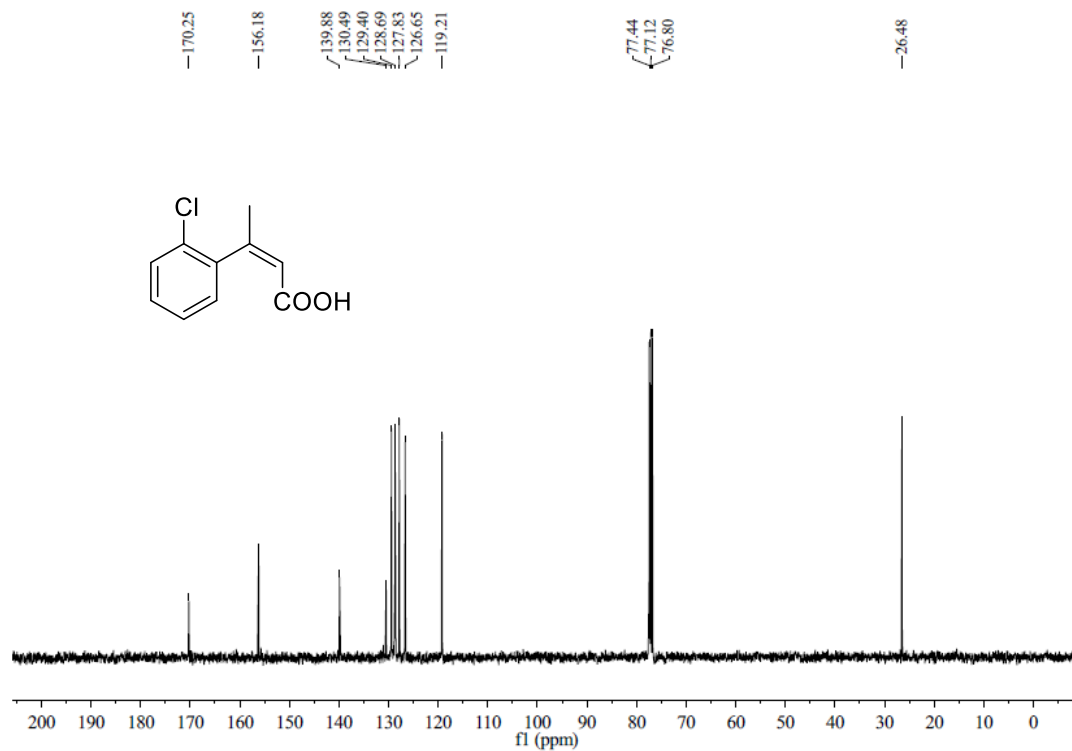

$^{13}\text{C}$  NMR (100 MHz, Chloroform-*d*)

(*Z*)-3-(3-nitrophenyl)but-2-enoic acid (**1d**)

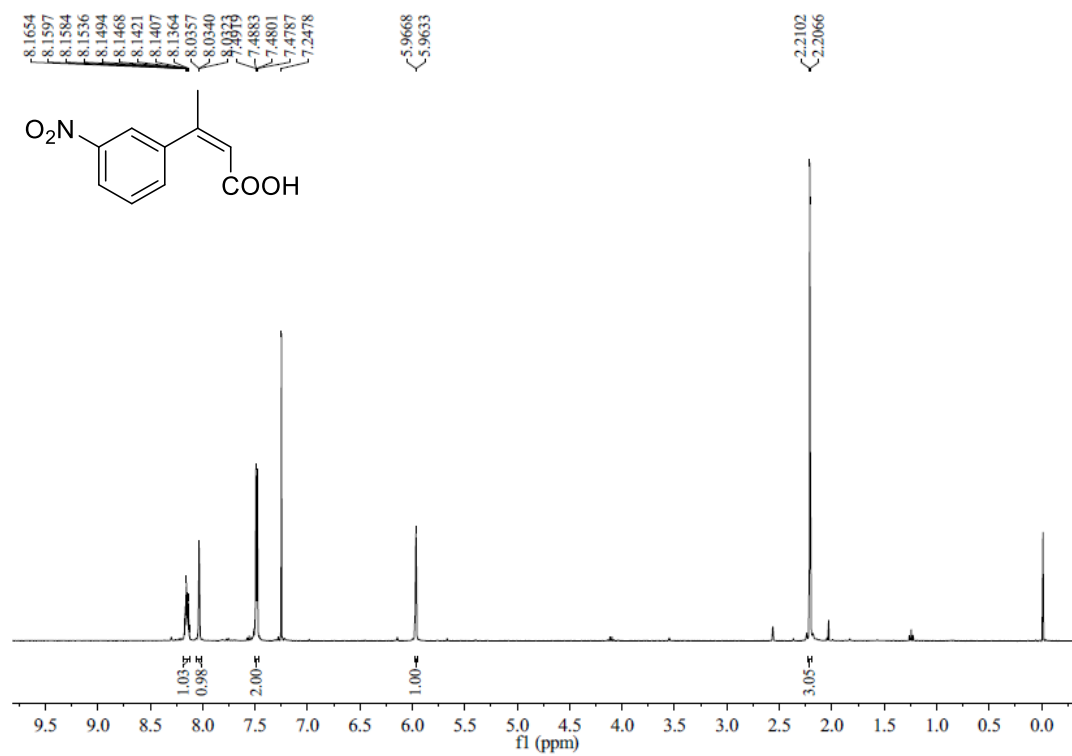

$^1\text{H}$  NMR (600 MHz, Chloroform-*d*)

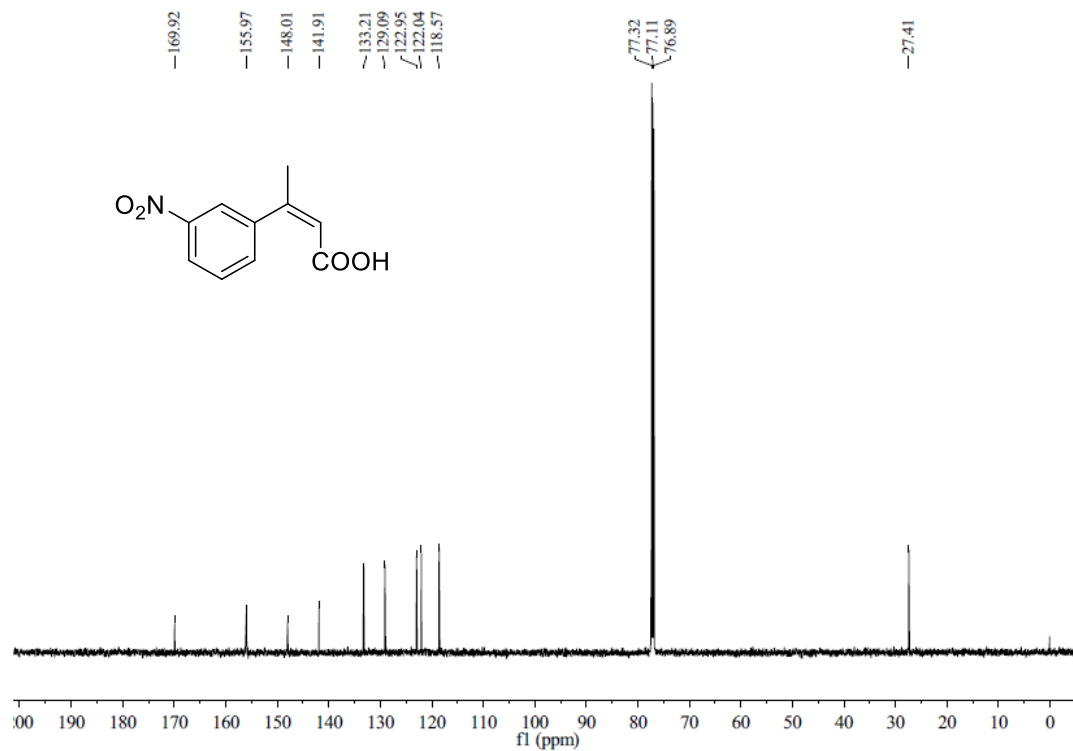

<sup>13</sup>C NMR (150 MHz, Chloroform-*d*)

(Z)-3-(3-fluorophenyl)but-2-enoic acid (1e)

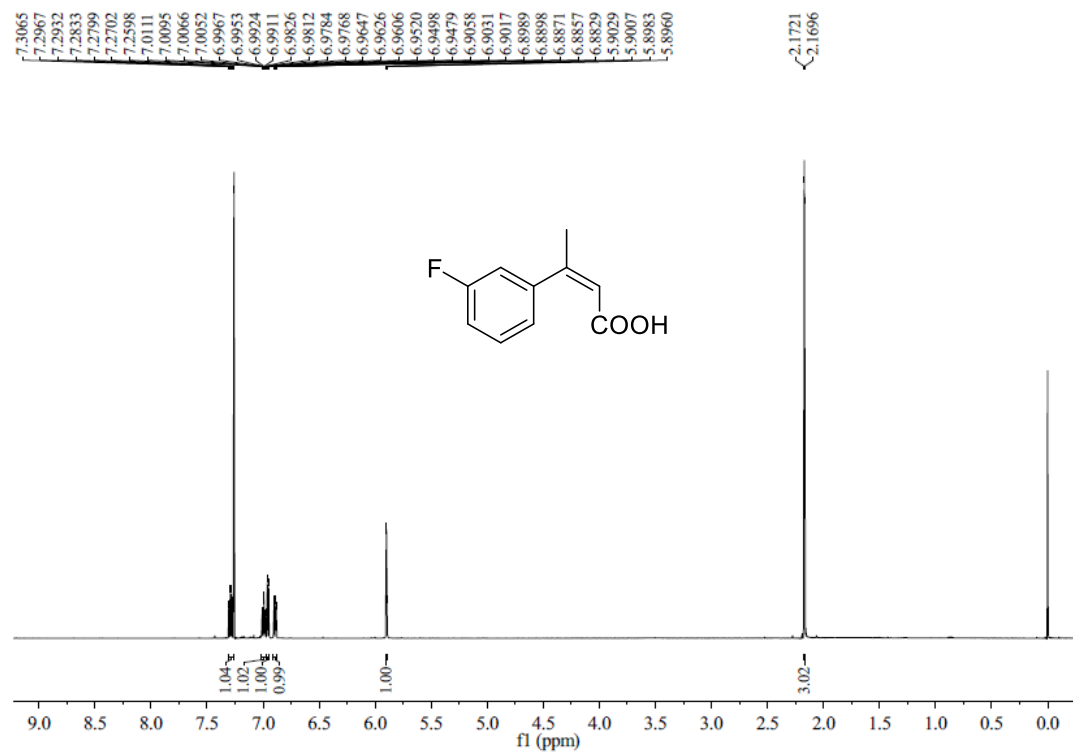

<sup>1</sup>H NMR (600 MHz, Chloroform-*d*)

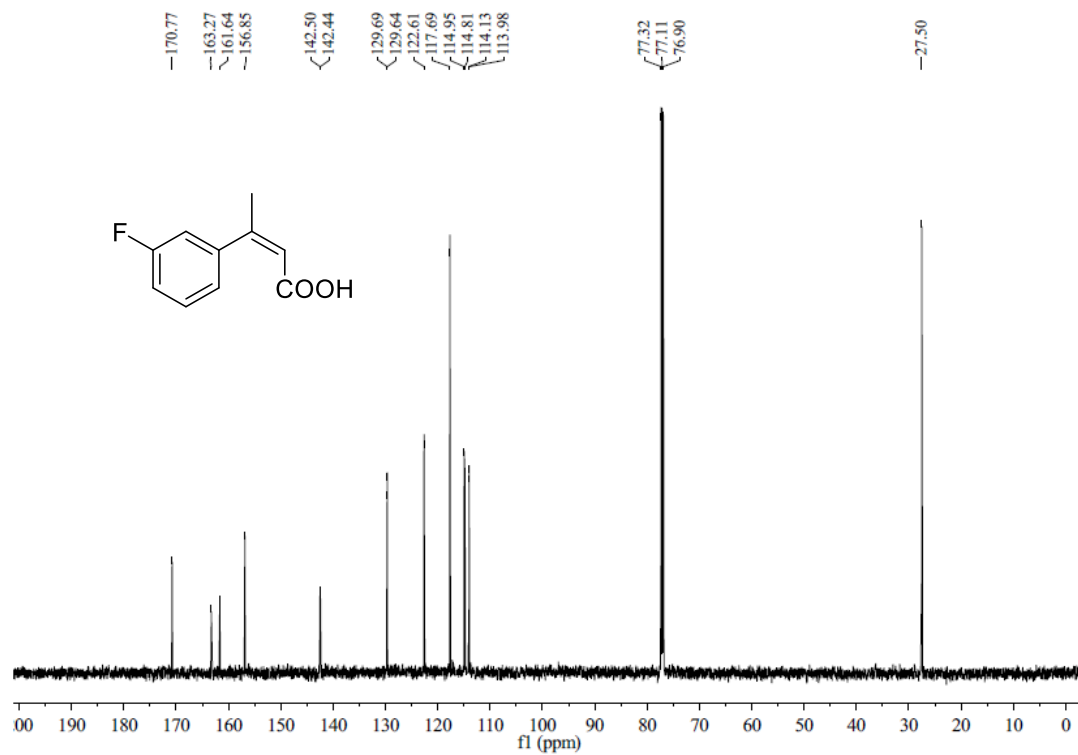

<sup>13</sup>C NMR (150 MHz, Chloroform-*d*)

(*Z*)-3-(3-bromophenyl)but-2-enoic acid (**1f**)

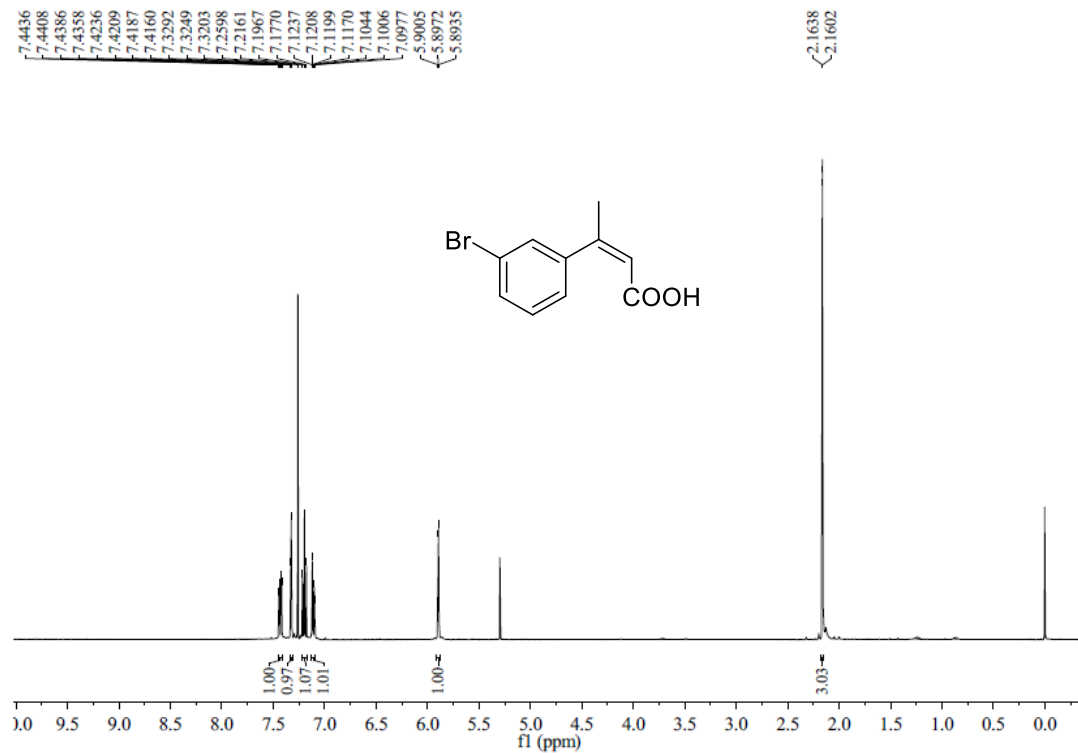

<sup>1</sup>H NMR (400 MHz, Chloroform-*d*)

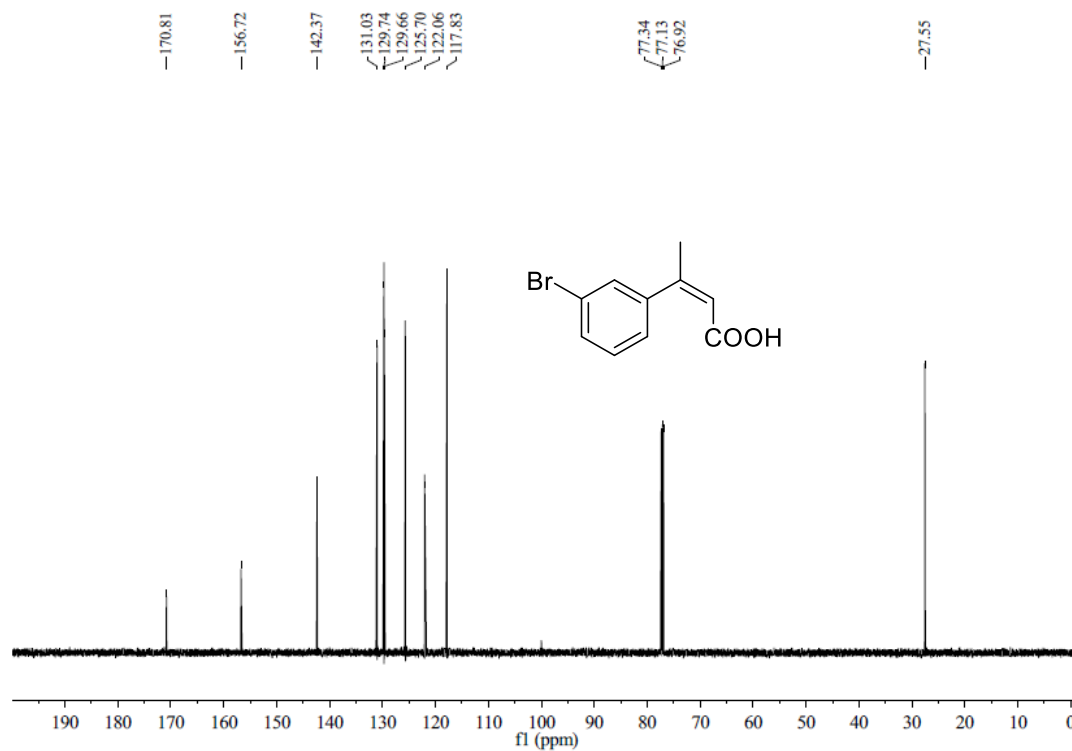

<sup>13</sup>C NMR (150 MHz, Chloroform-*d*)

(*Z*)-3-(4-nitrophenyl)but-2-enoic acid (**1g**)

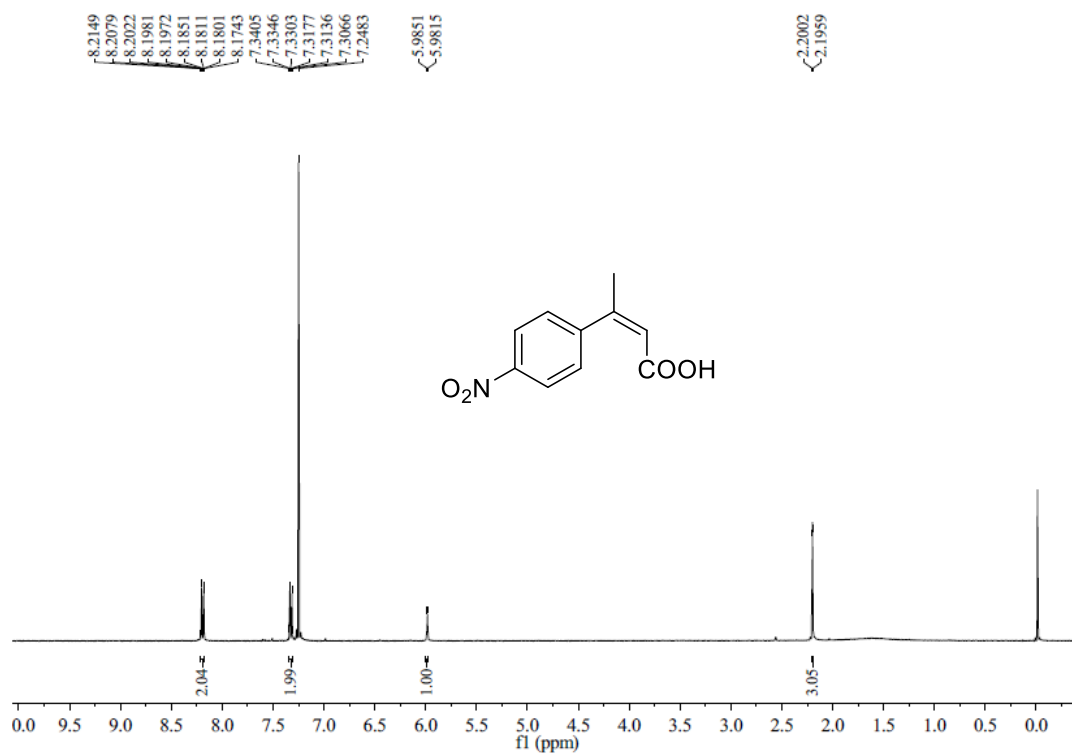

<sup>1</sup>H NMR (400 MHz, Chloroform-*d*)

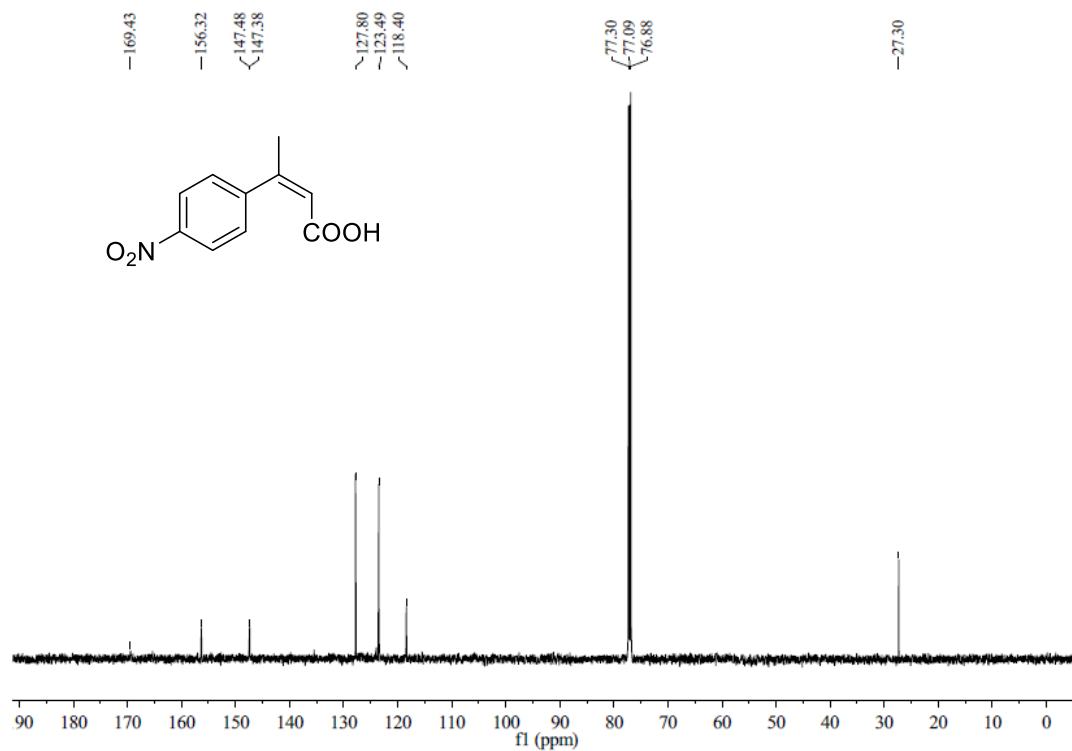

<sup>13</sup>C NMR (150 MHz, Chloroform-*d*)  
(*Z*)-3-(4-fluorophenyl)but-2-enoic acid (**1h**)

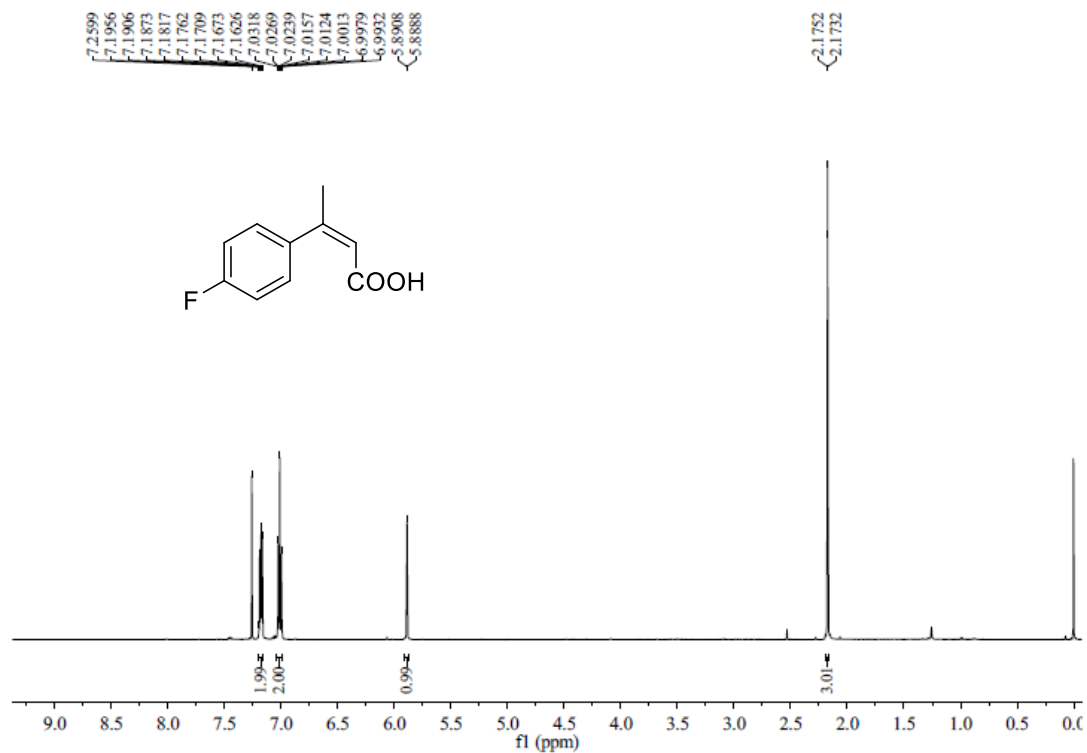

<sup>1</sup>H NMR (600 MHz, Chloroform-*d*)

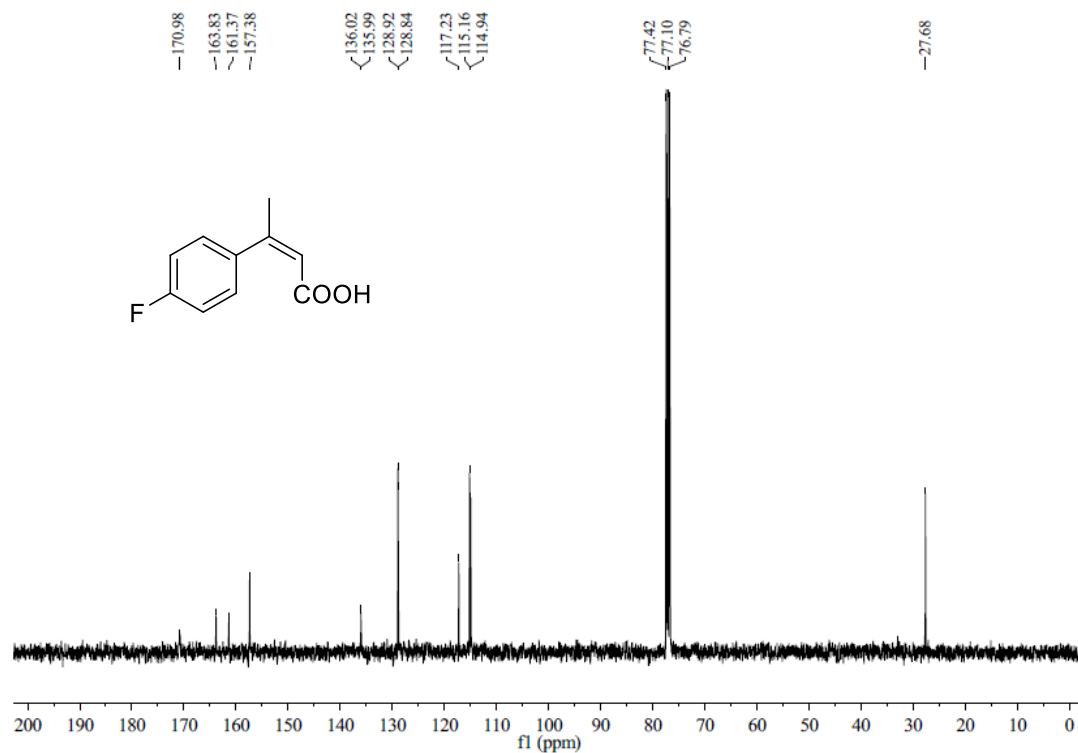

<sup>13</sup>C NMR (100 MHz, Chloroform-*d*)

(*Z*)-3-(4-chlorophenyl)but-2-enoic acid (**1i**)

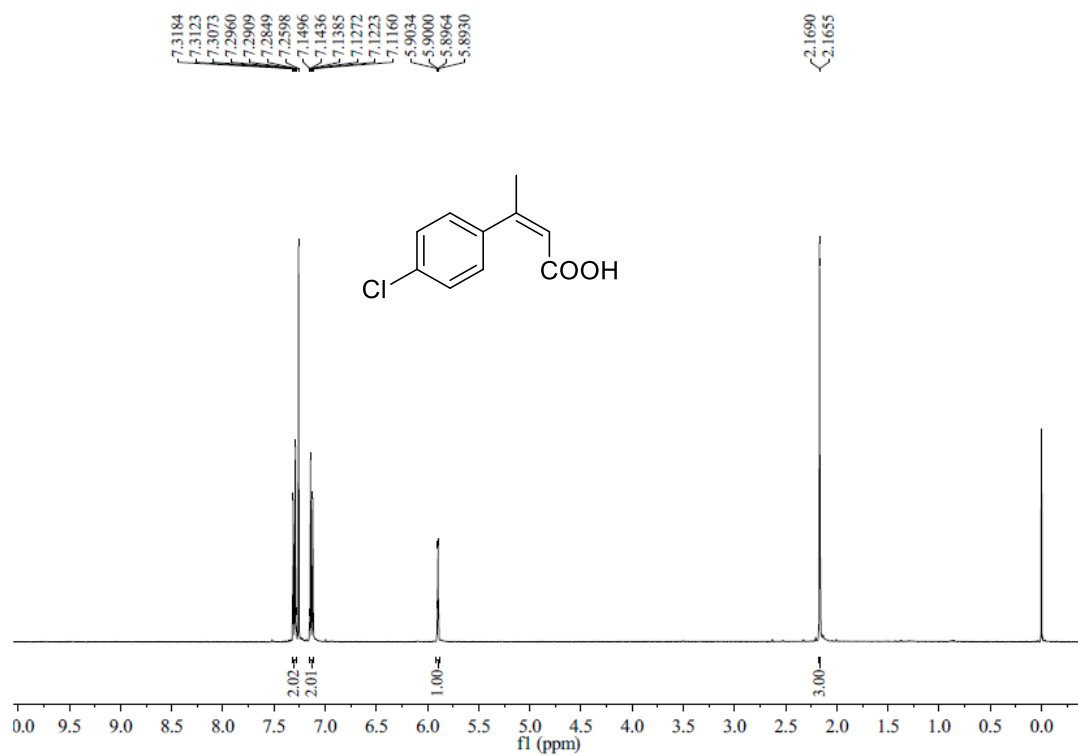

<sup>1</sup>H NMR (400 MHz, Chloroform-*d*)



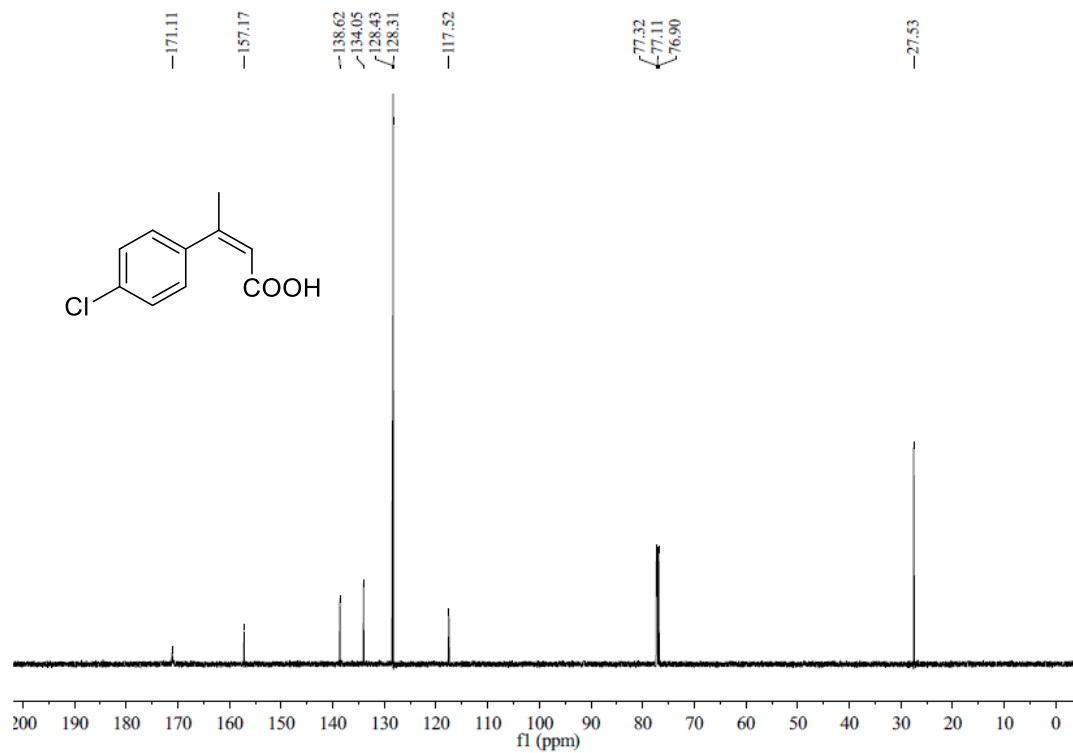

<sup>13</sup>C NMR (150 MHz, Chloroform-*d*)

(*Z*)-3-(*o*-tolyl)but-2-enoic acid (**1j**)

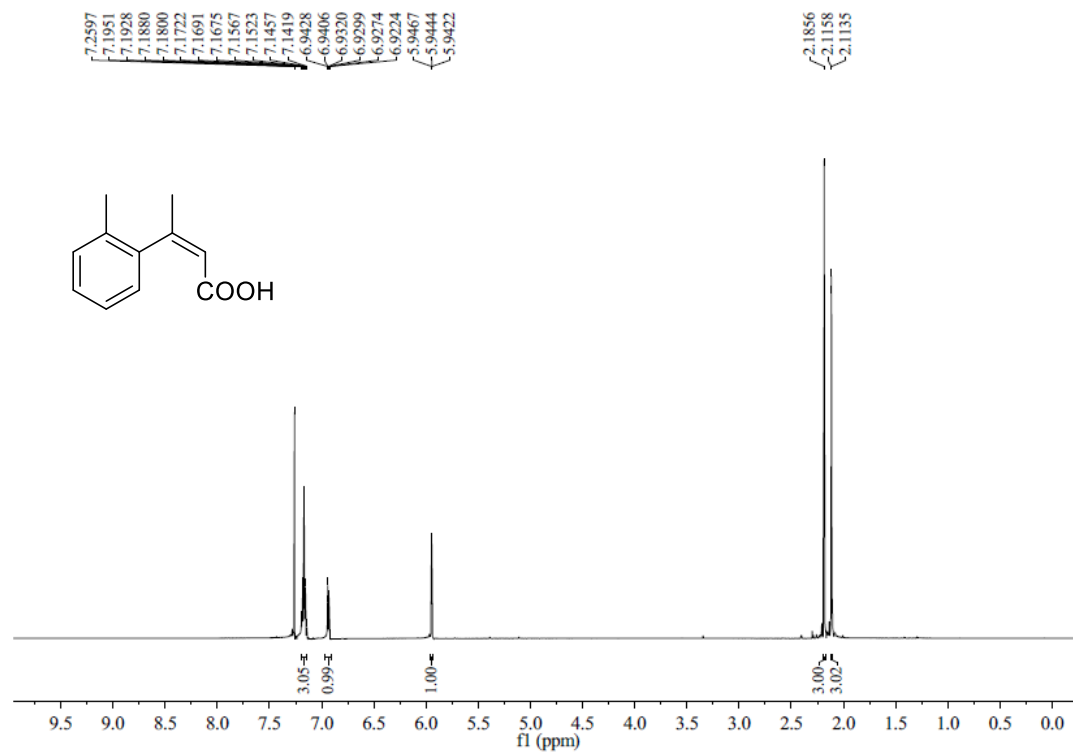

<sup>1</sup>H NMR (600 MHz, Chloroform-*d*)

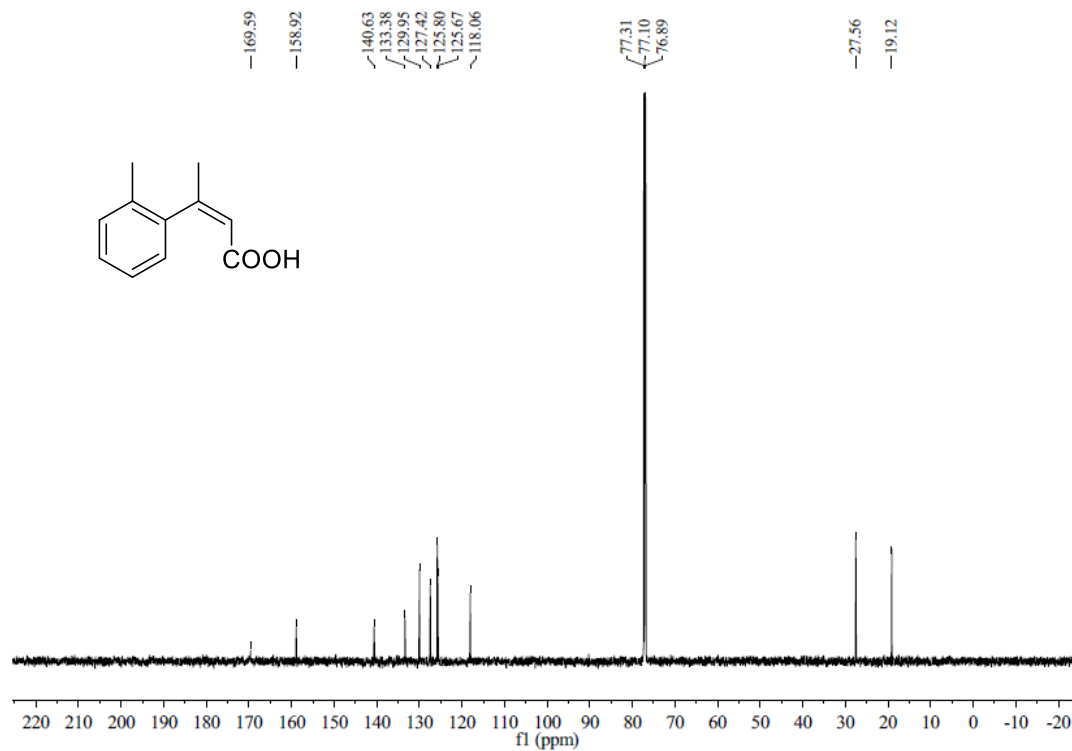

$^{13}\text{C}$  NMR (150 MHz, Chloroform-*d*)

(*Z*)-3-(*m*-tolyl)but-2-enoic acid (**1k**)

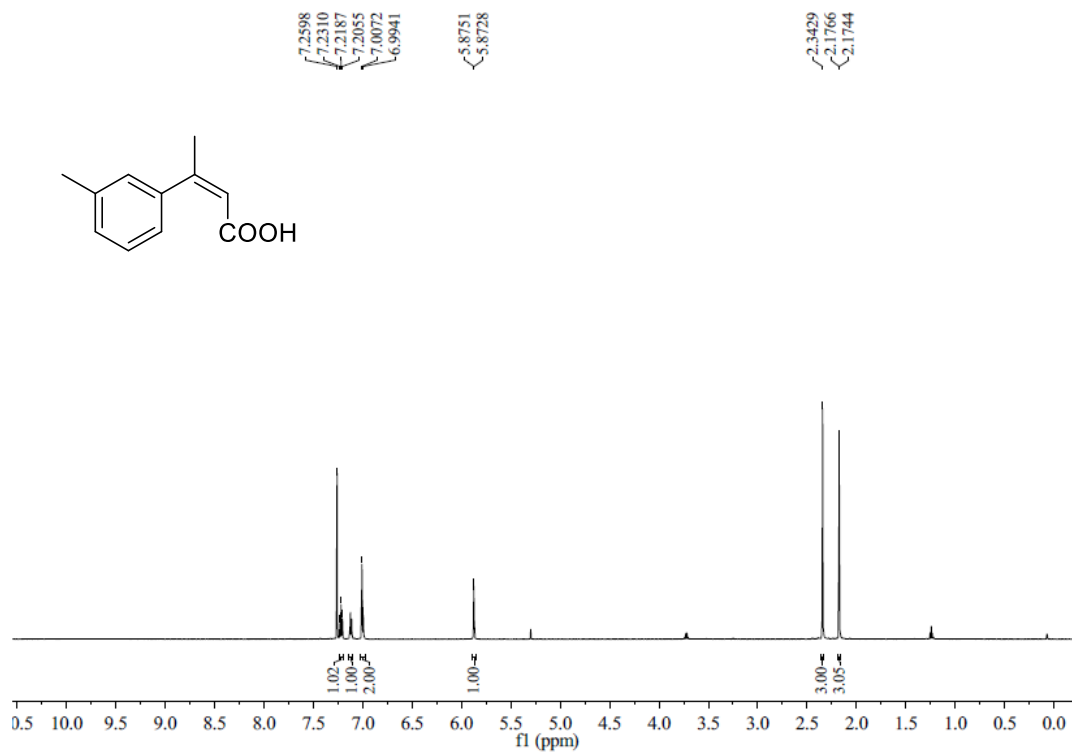

$^1\text{H}$  NMR (600 MHz, Chloroform-*d*)

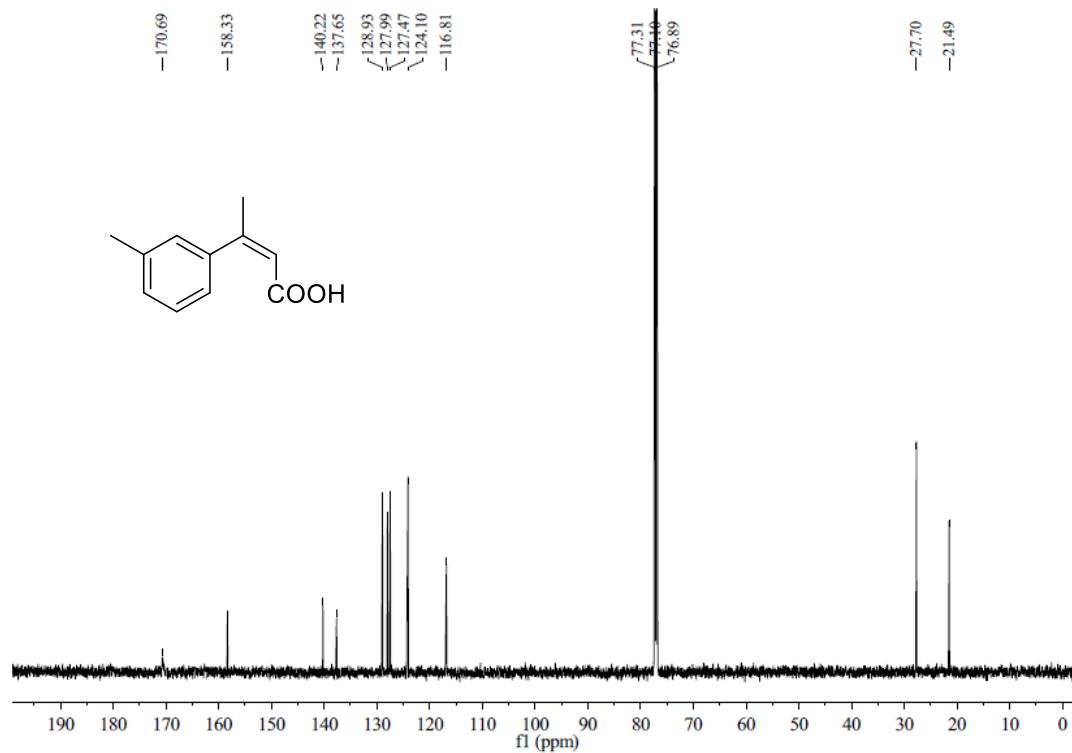

$^{13}\text{C}$  NMR (150 MHz, Chloroform-*d*)

(*Z*)-3-(*p*-tolyl)but-2-enoic acid (**11**)

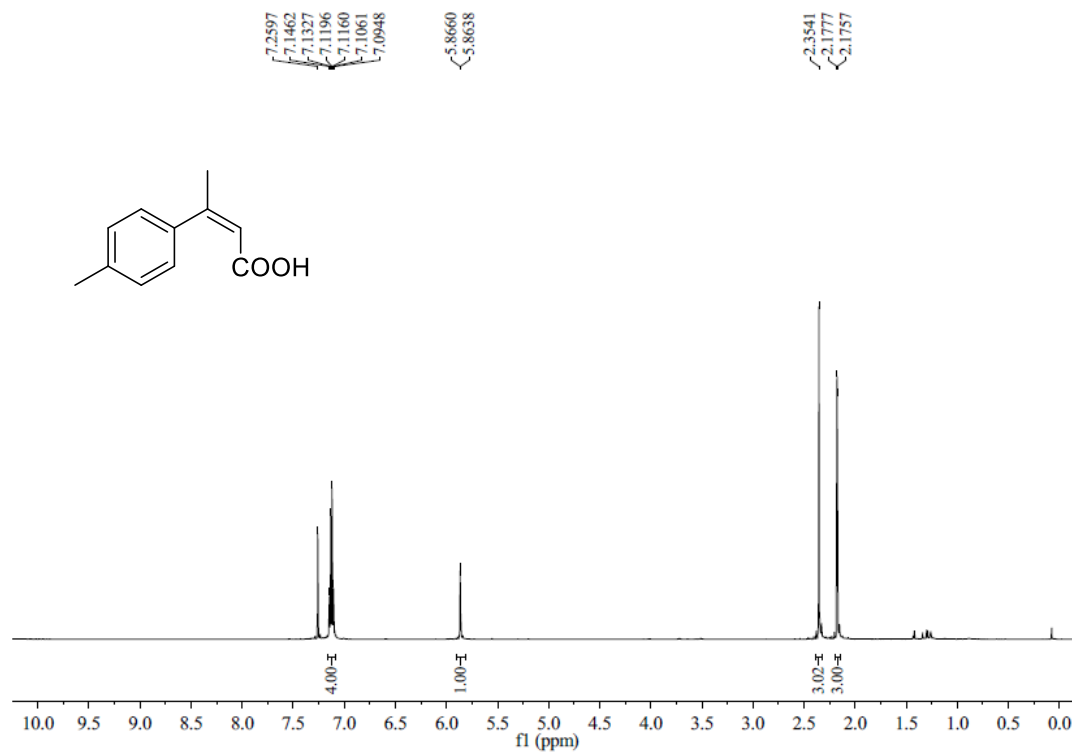

$^1\text{H}$  NMR (600 MHz, Chloroform-*d*)

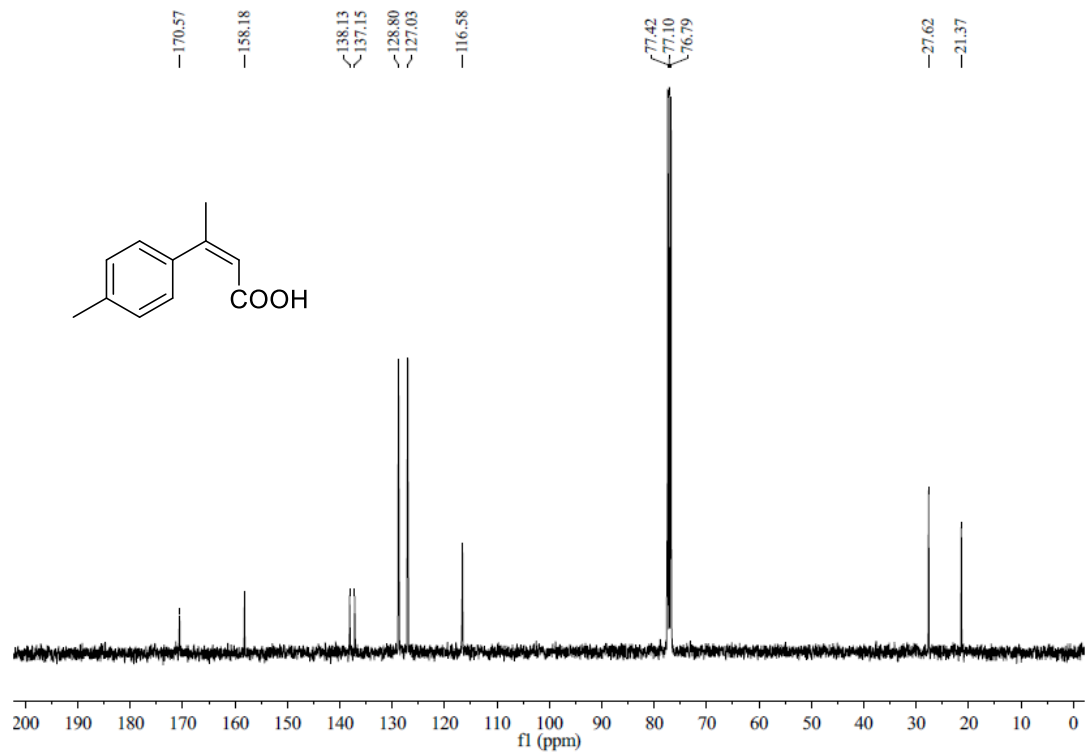

<sup>13</sup>C NMR (100 MHz, Chloroform-*d*)

(*Z*)-3-(naphthalen-2-yl)but-2-enoic acid (**1m**)

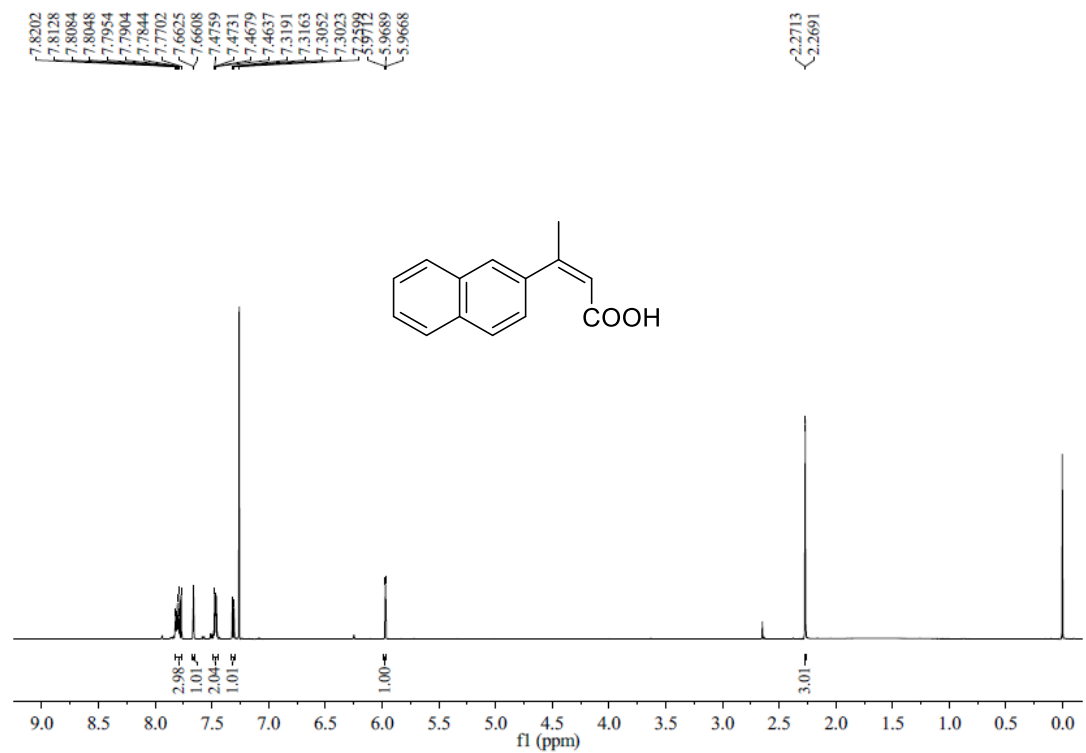

<sup>1</sup>H NMR (600 MHz, Chloroform-*d*)

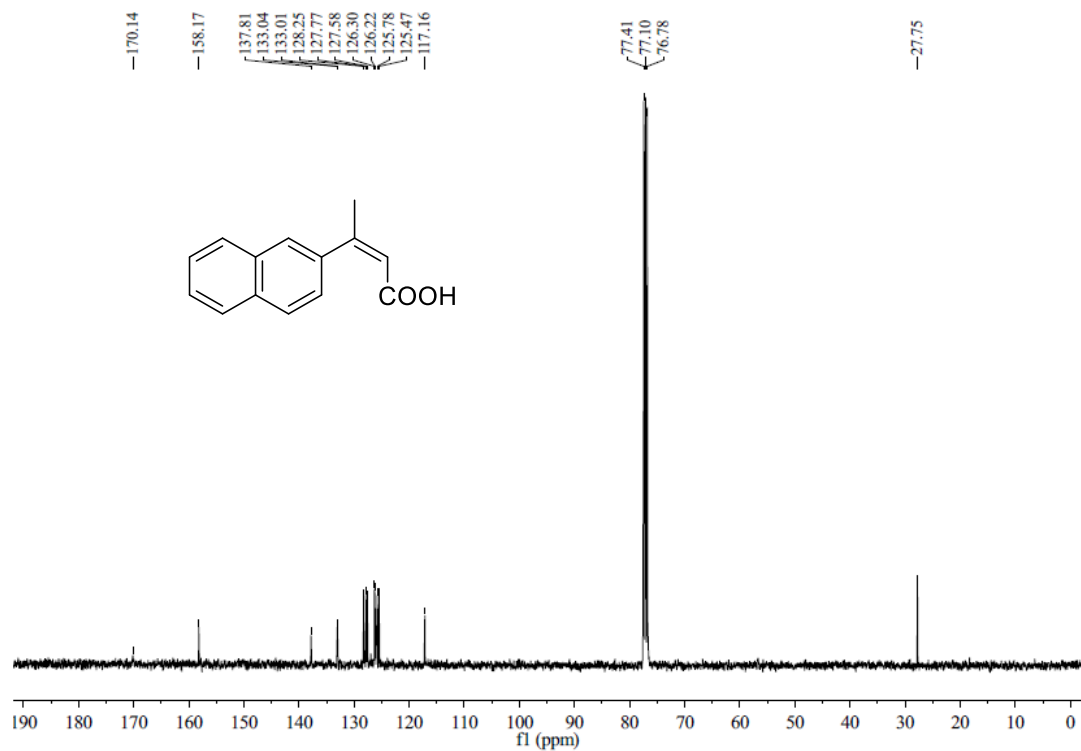

$^{13}\text{C}$  NMR (100 MHz, Chloroform-*d*)

(*Z*)-3-phenylbut-2-enoic acid (**1n**)

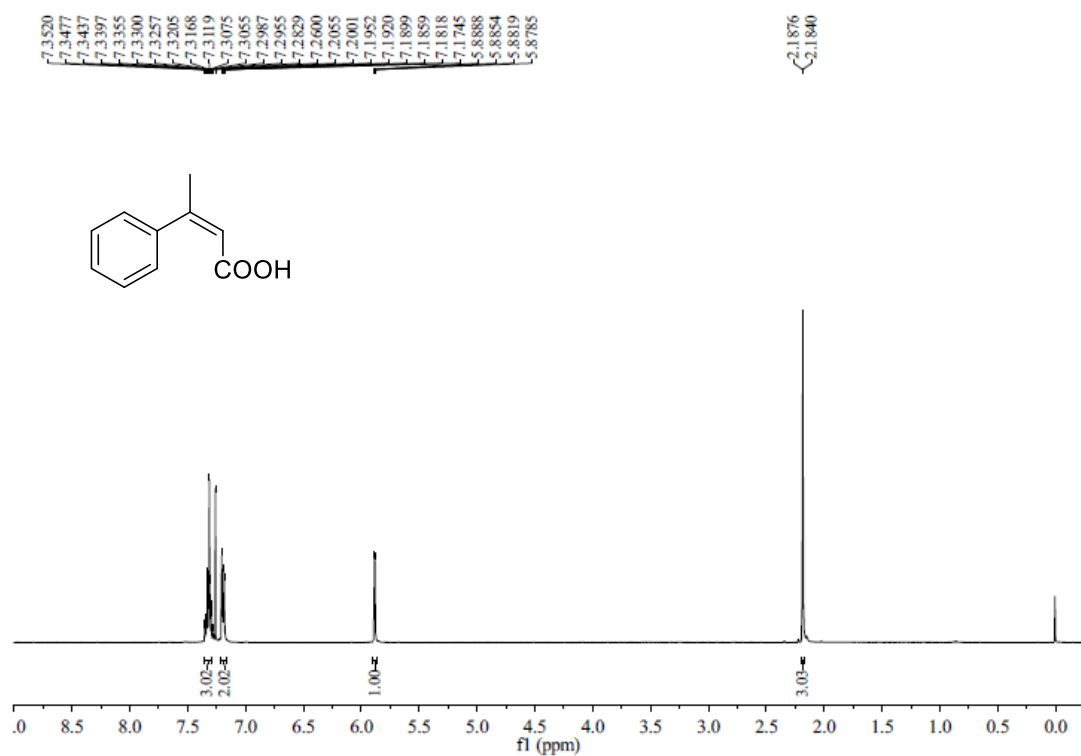

$^1\text{H}$  NMR (400 MHz, Chloroform-*d*)

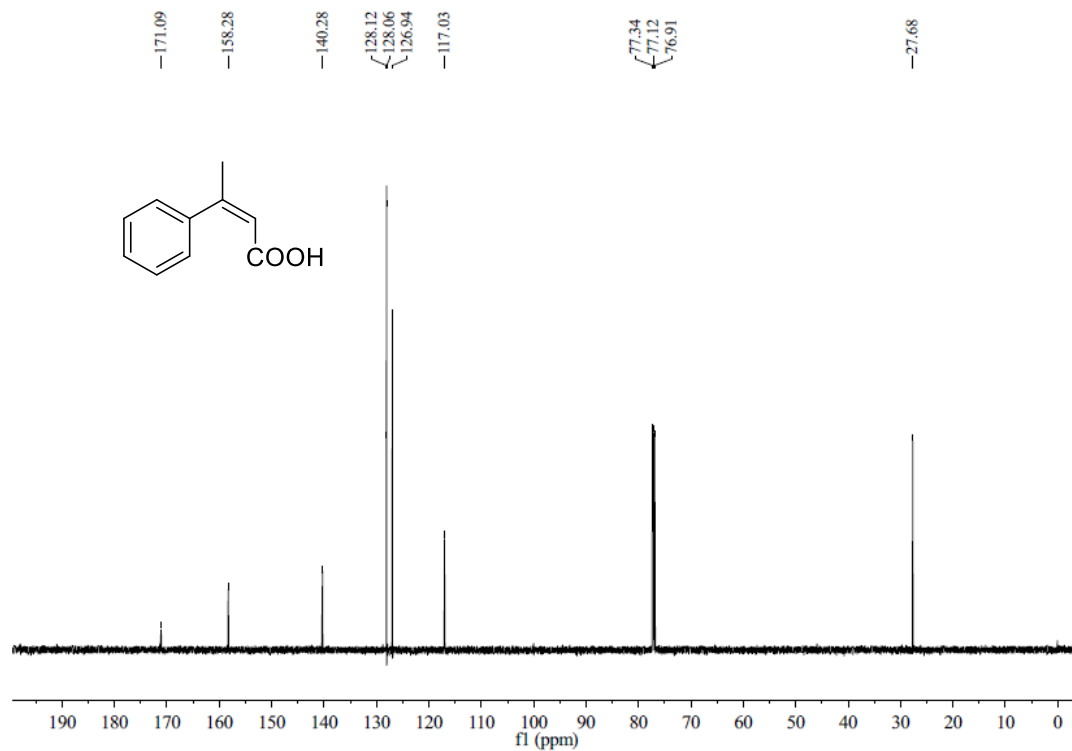

$^{13}\text{C}$  NMR (150 MHz, Chloroform-*d*)

(*Z*)-3-phenylpent-2-enoic acid (**10**)

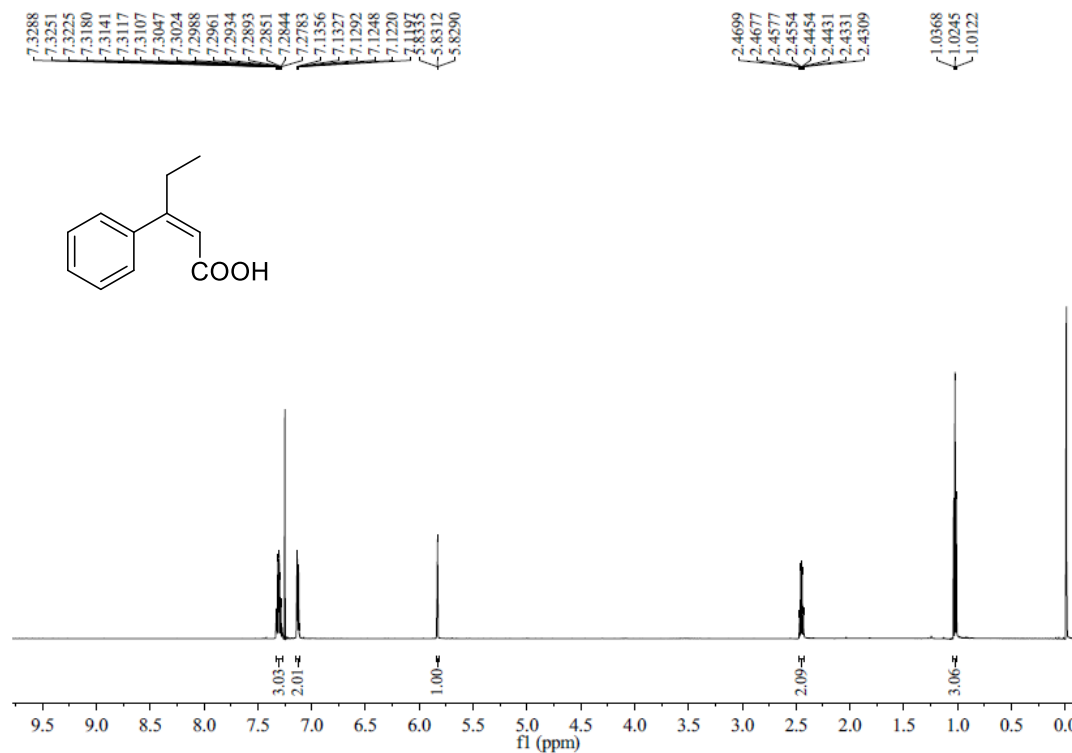

$^1\text{H}$  NMR (600 MHz, Chloroform-*d*)

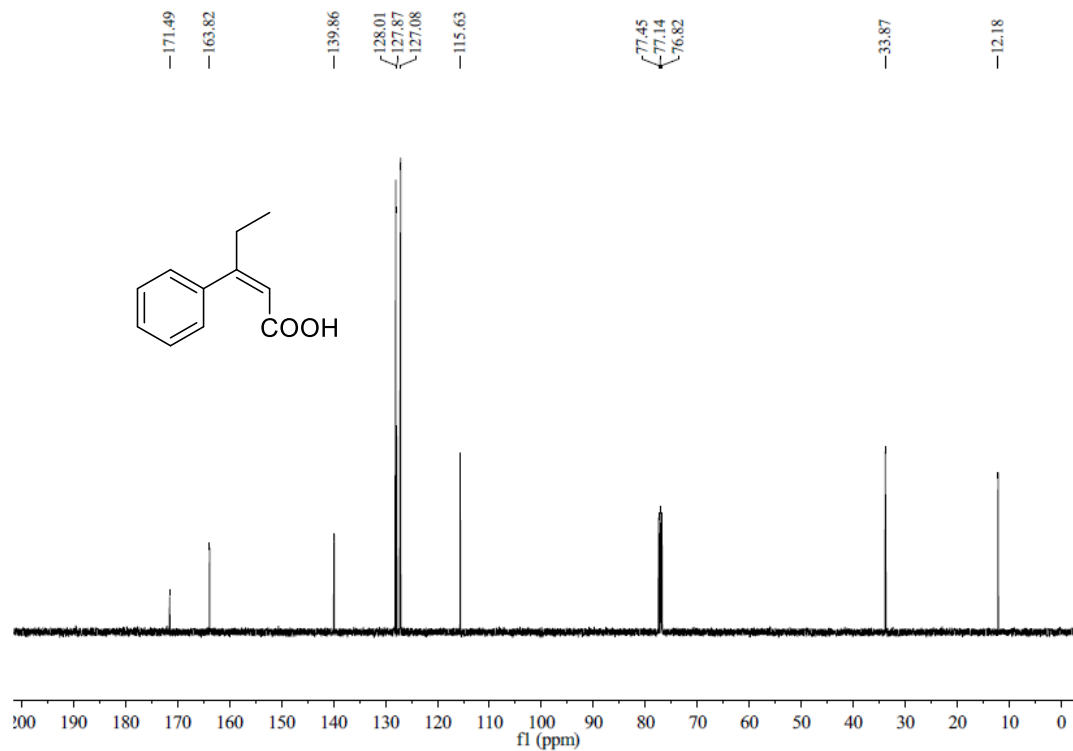

$^{13}\text{C}$  NMR (100 MHz, Chloroform-*d*)

(*Z*)-4-methyl-3-phenylpent-2-enoic acid (**1p**)

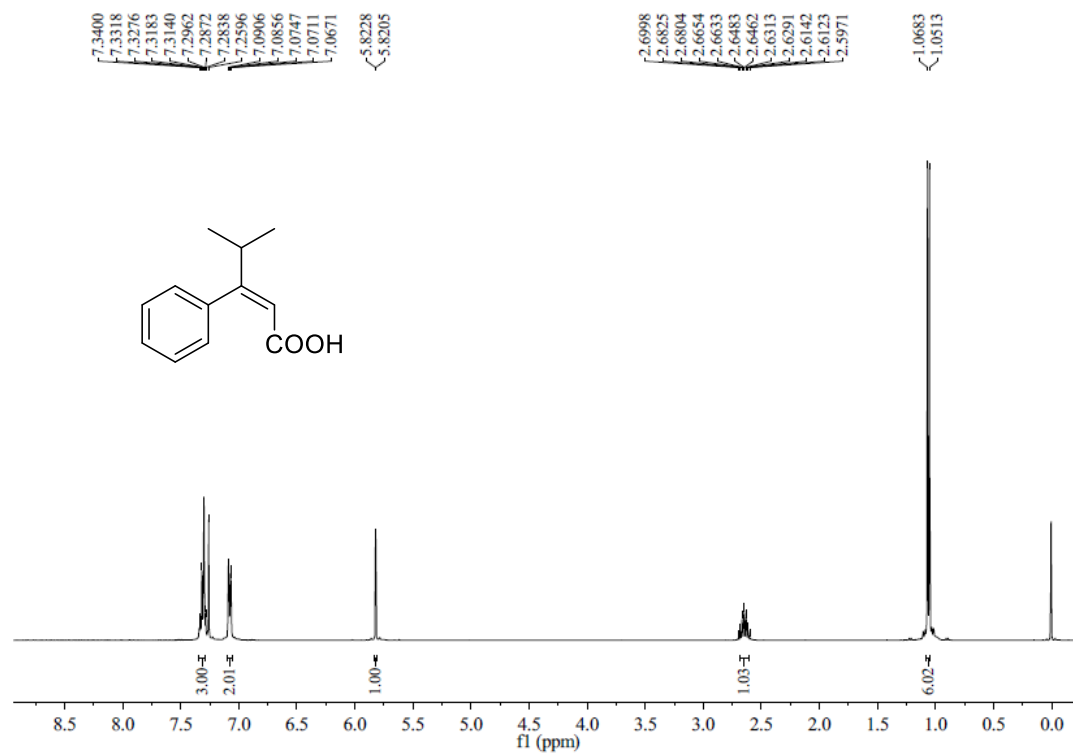

$^1\text{H}$  NMR (400 MHz, Chloroform-*d*)

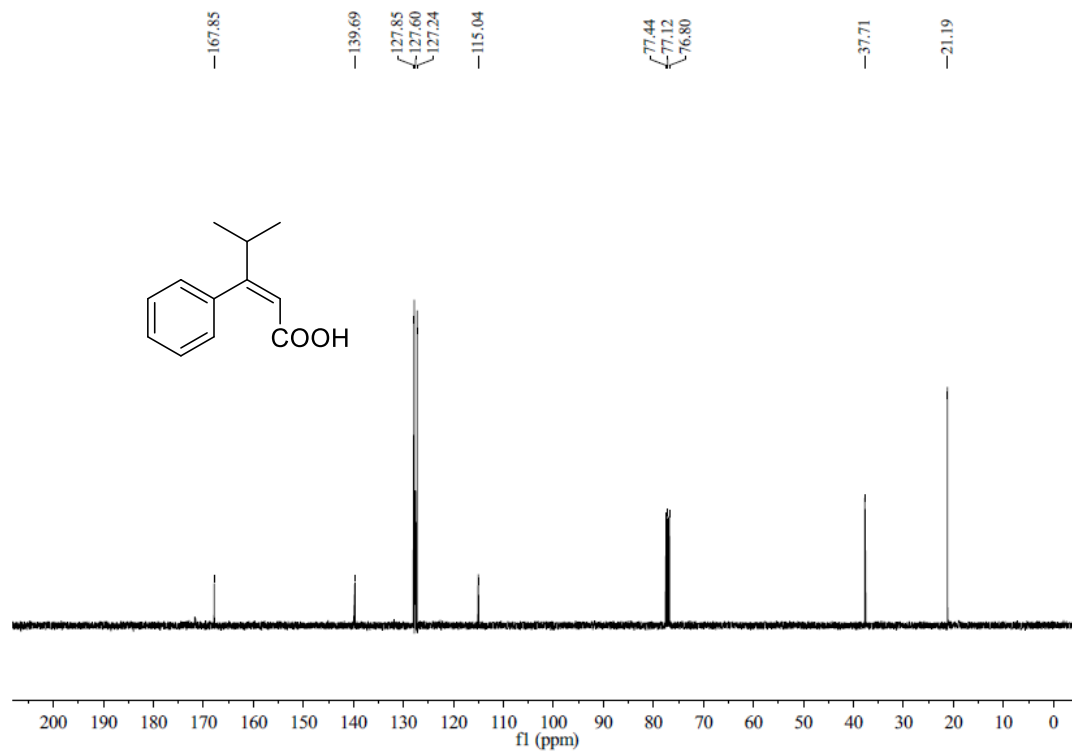

<sup>13</sup>C NMR (100 MHz, Chloroform-*d*)

(*Z*)-3-cyclohexyl-3-phenylacrylic acid (**1q**)

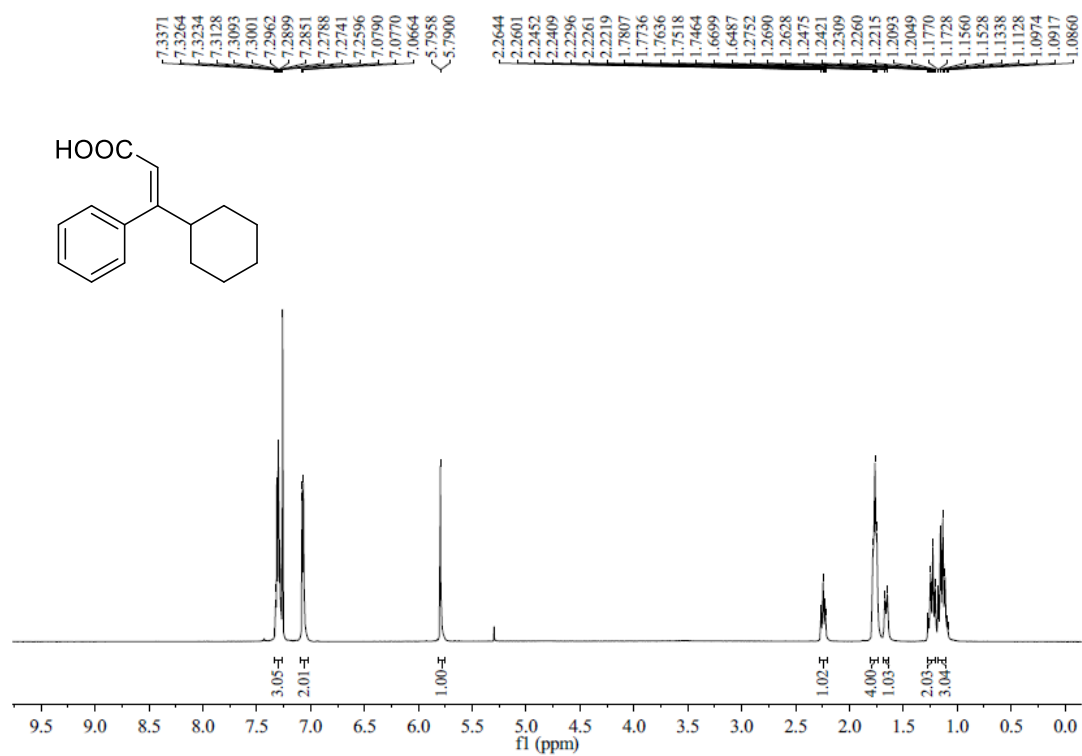

<sup>1</sup>H NMR (600 MHz, Chloroform-*d*)



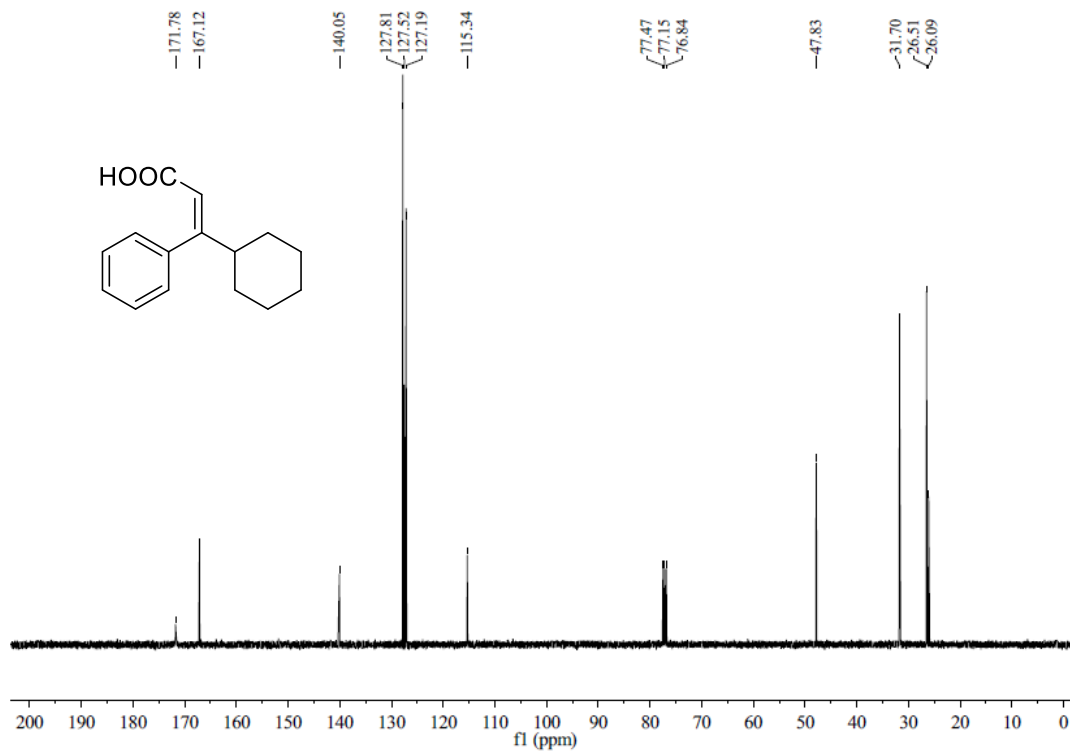

$^{13}\text{C}$  NMR (100 MHz, Chloroform-*d*)

(*E*)-3-phenylpent-2-enoic acid (**1r**)

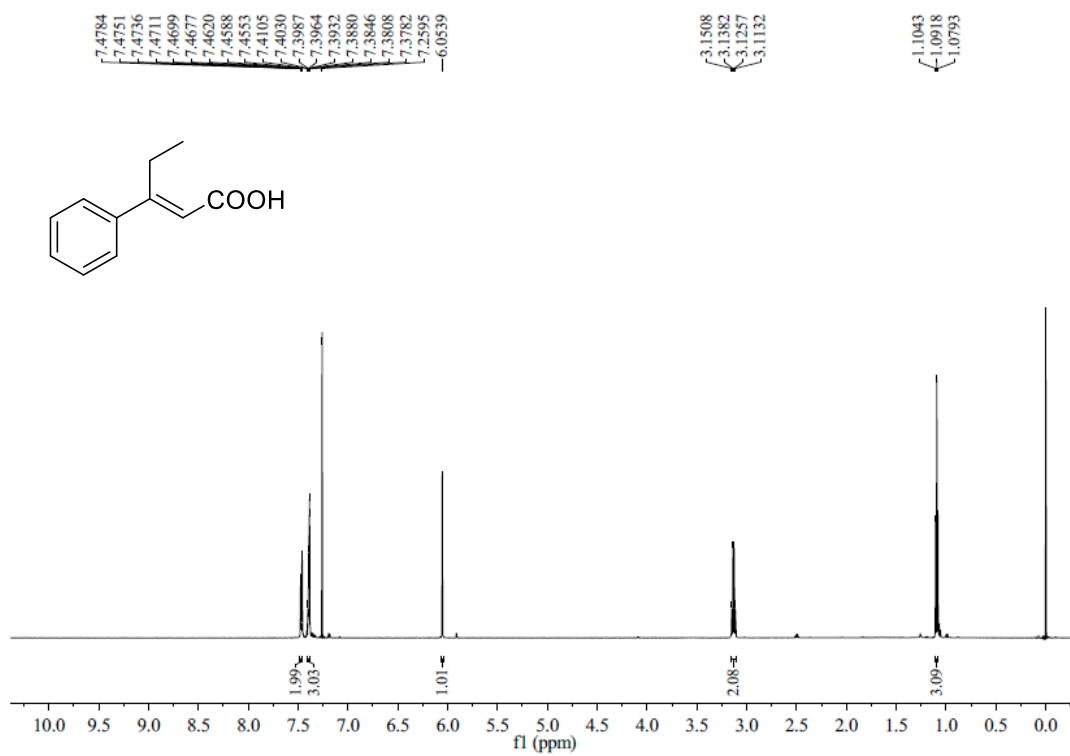

$^1\text{H}$  NMR (600 MHz, Chloroform-*d*)

(*E*)-4-methyl-3-phenylpent-2-enoic acid (**1s**)

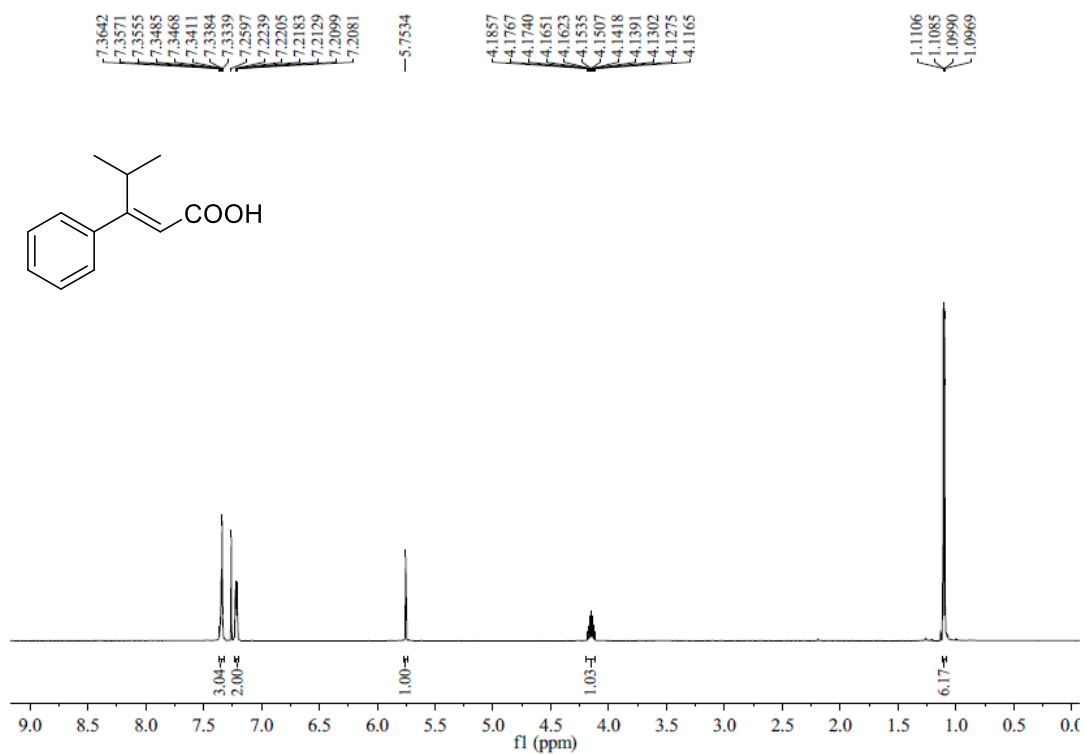

<sup>1</sup>H NMR (600 MHz, Chloroform-*d*)

(*Z*)-3-phenyl-3-(*o*-tolyl)acrylic acid (**1t**)

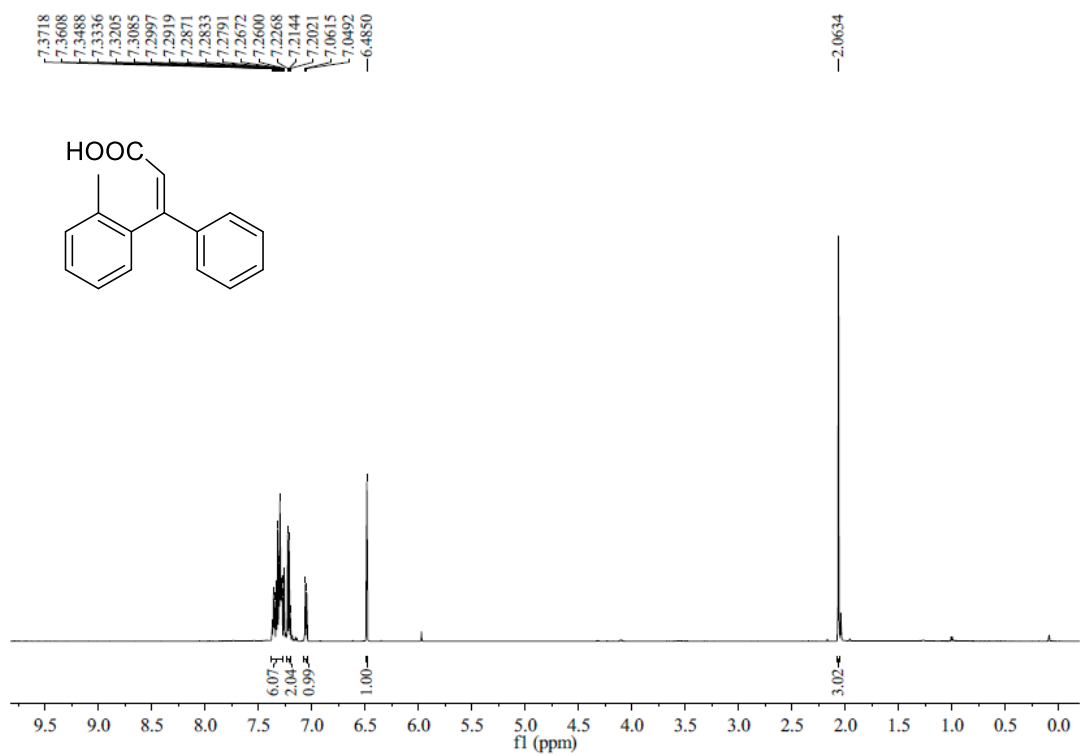

<sup>1</sup>H NMR (600 MHz, Chloroform-*d*)

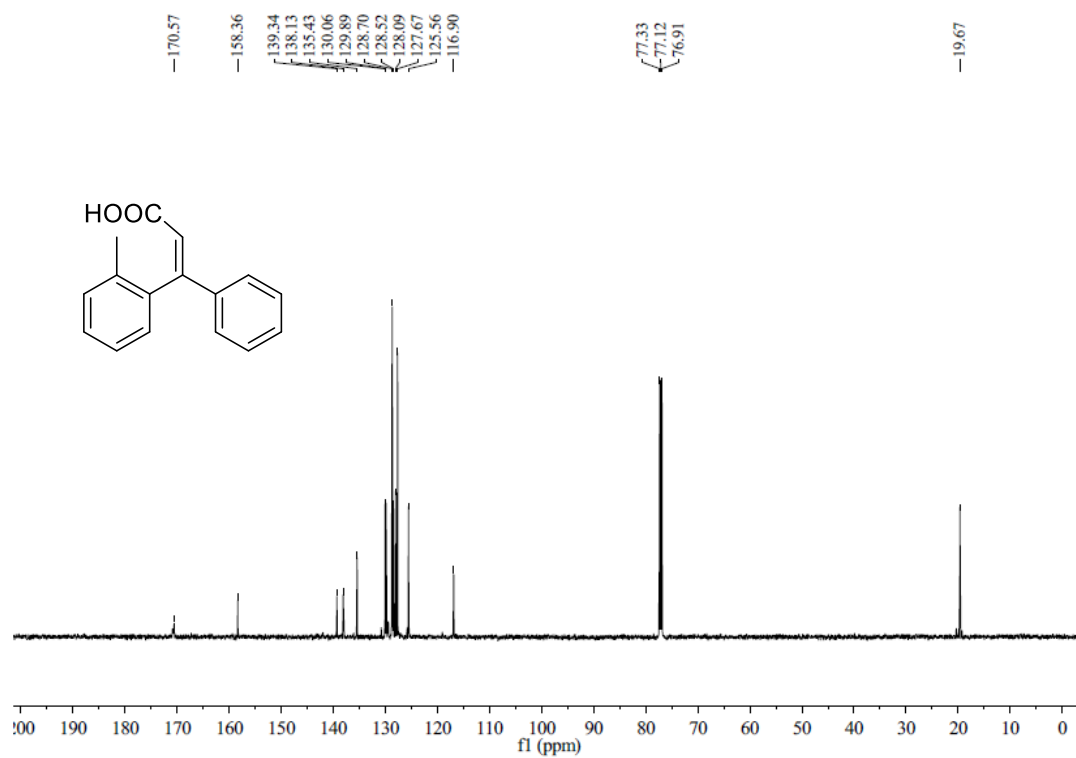

$^{13}\text{C}$  NMR (150 MHz, Chloroform-*d*)

3-phenyl-3-(*o*-tolyl)acrylic acid (**1u**) (*E:Z* = 8:1)

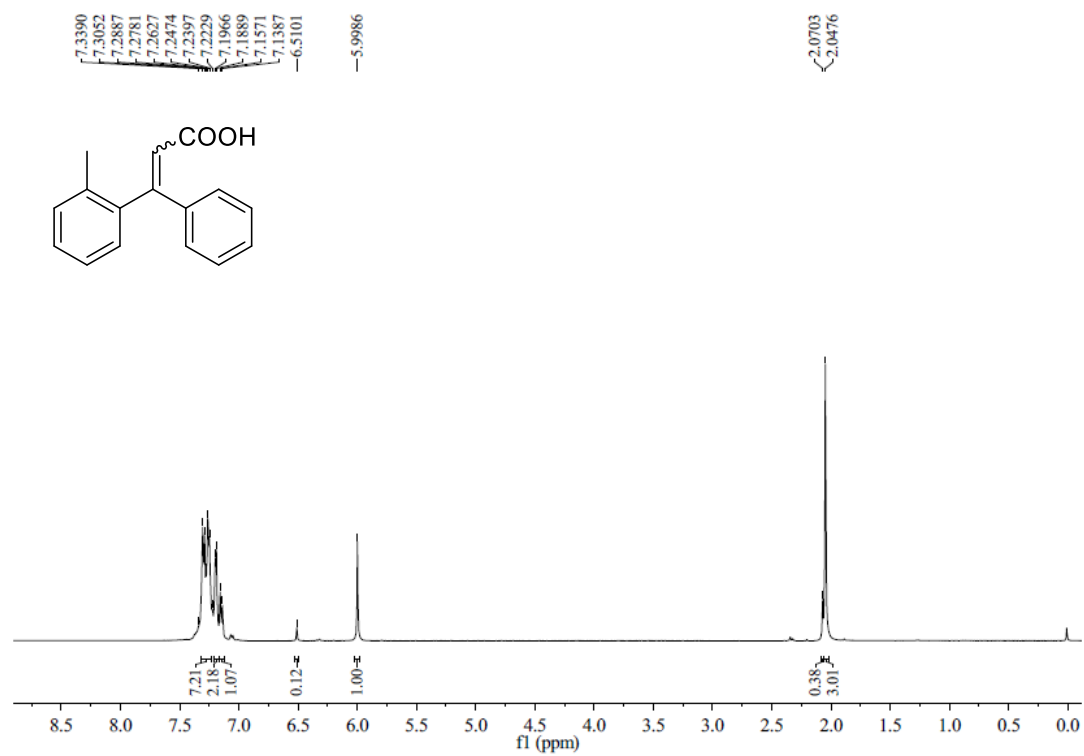

$^1\text{H}$  NMR (400 MHz, Chloroform-*d*)

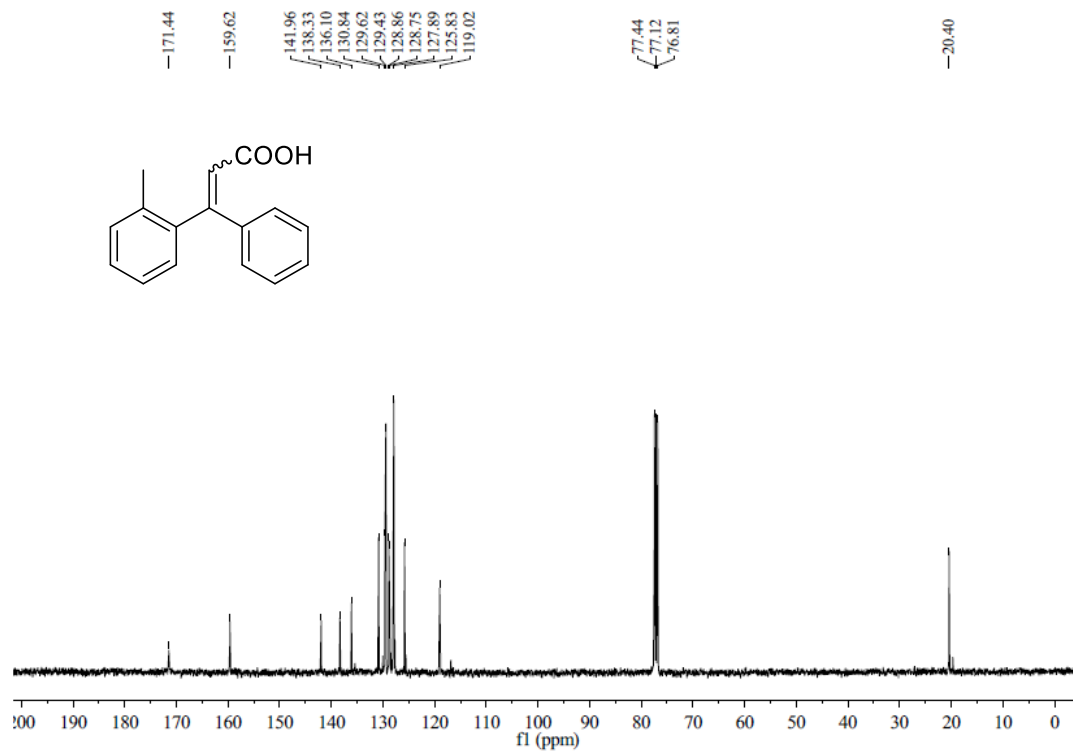

<sup>13</sup>C NMR (150 MHz, Chloroform-*d*)

ethyl (Z)-(2-fluorophenyl)but-2-enoate (**1v**)

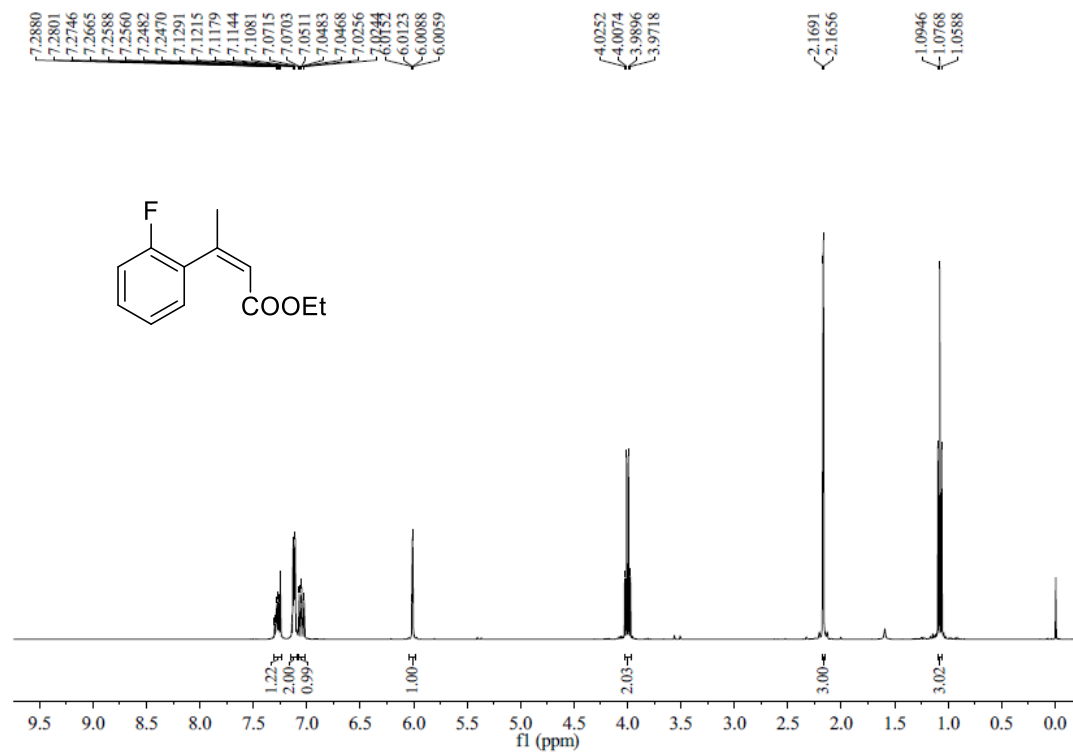

<sup>1</sup>H NMR (400 MHz, Chloroform-*d*)

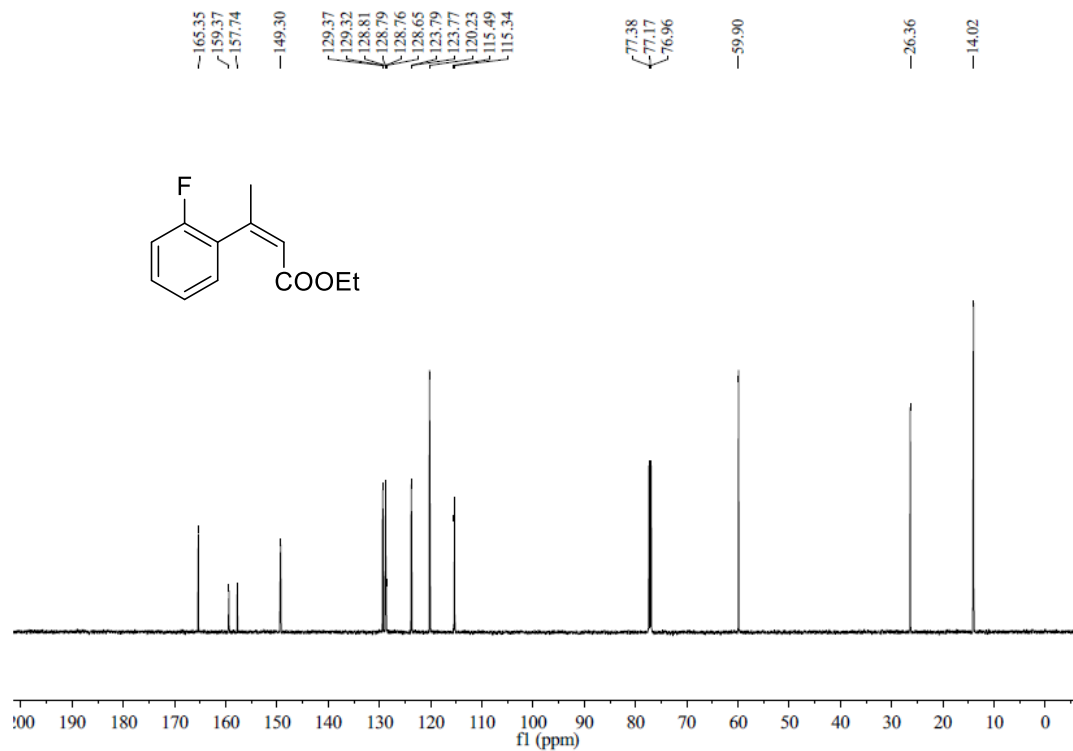

$^{13}\text{C}$  NMR (150 MHz, Chloroform-*d*)

(+)-3-(2-fluorophenyl)butanoic acid (**2a**)

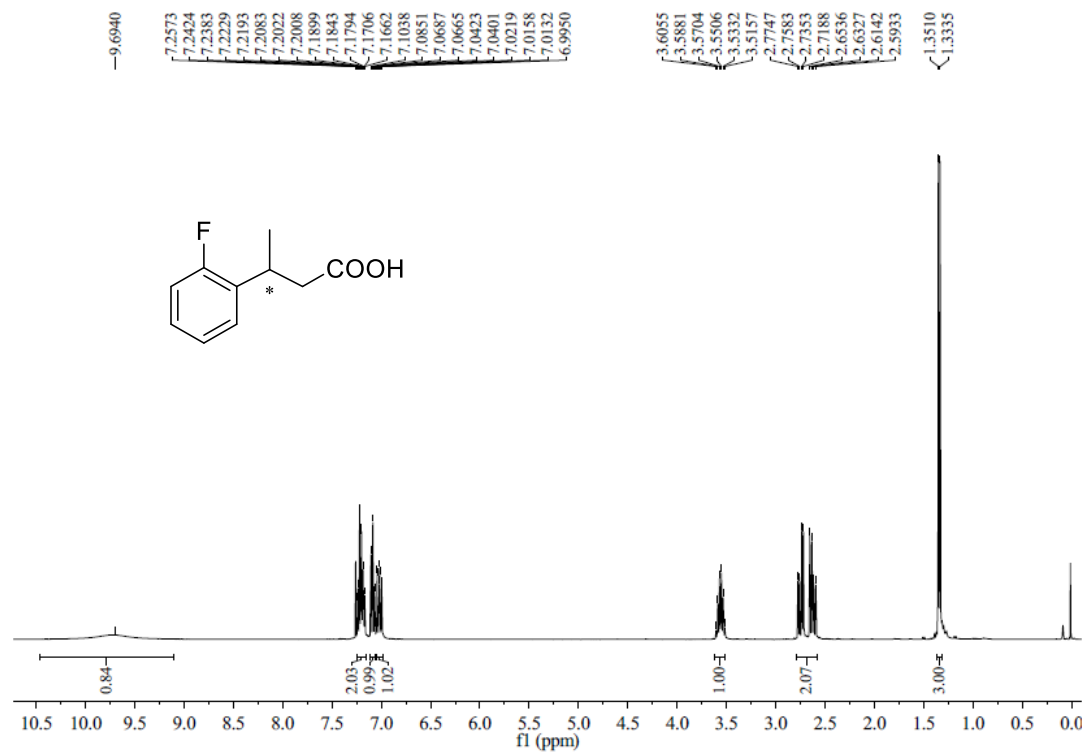

$^1\text{H}$  NMR (400 MHz, Chloroform-*d*)

(-)-3-(2-fluorophenyl)butanoic acid (**2b**)

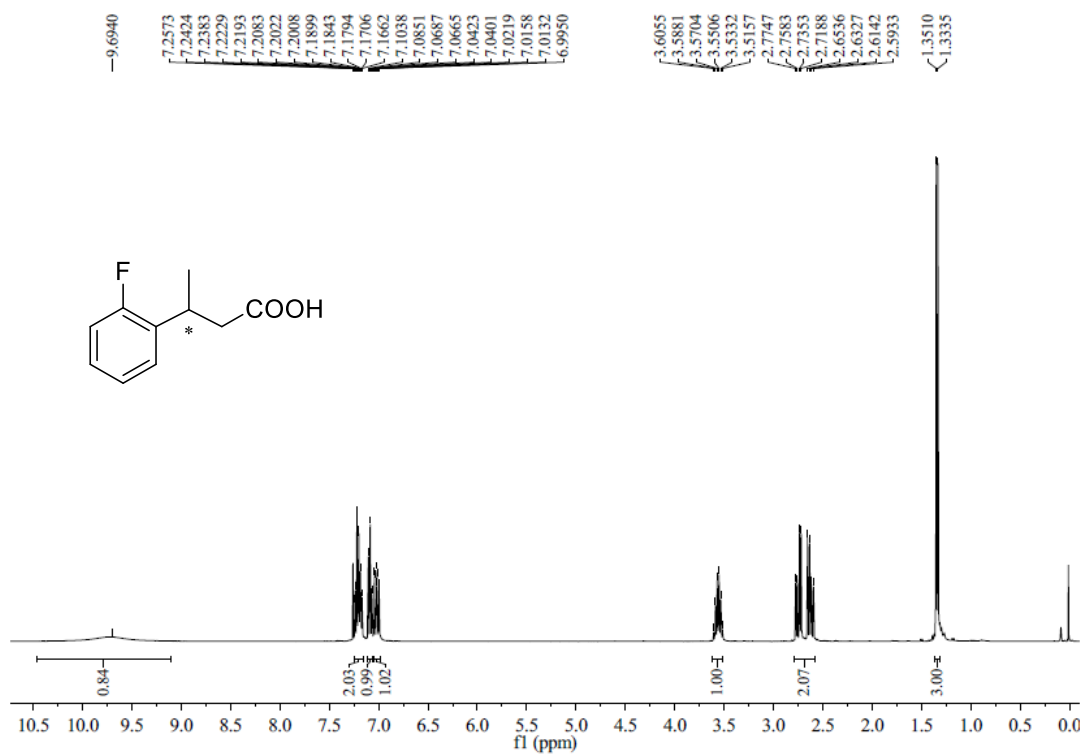

<sup>1</sup>H NMR (400 MHz, Chloroform-*d*)

(-)-3-(2-chlorophenyl)butanoic acid (**2c**)

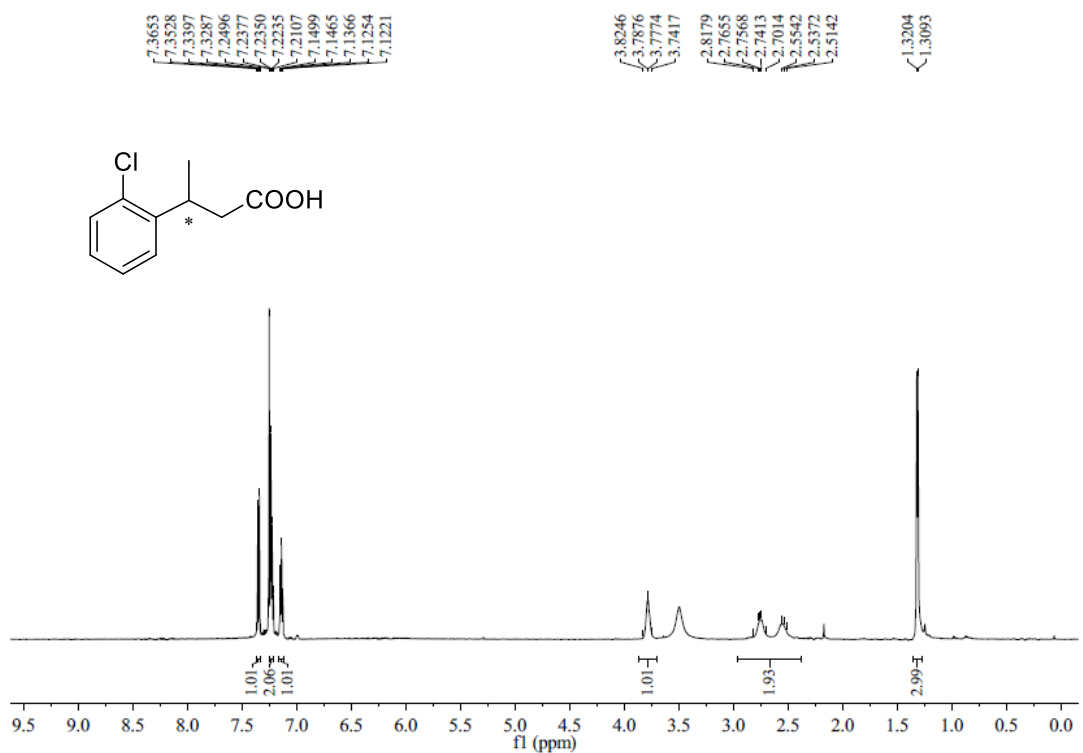

<sup>1</sup>H NMR (600 MHz, Chloroform-*d*)

(-)-3-(3-nitrophenyl)butanoic acid (**2d**)

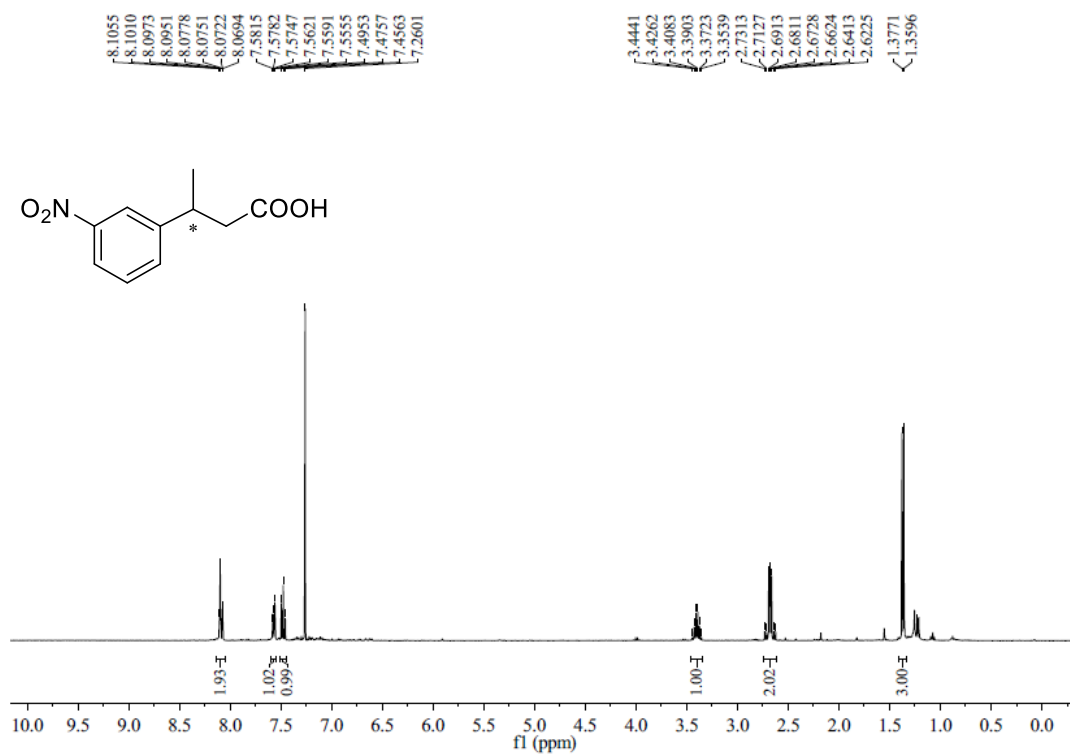

<sup>1</sup>H NMR (400 MHz, Chloroform-*d*)

(-)-3-(3-fluorophenyl)butanoic acid (**2e**)

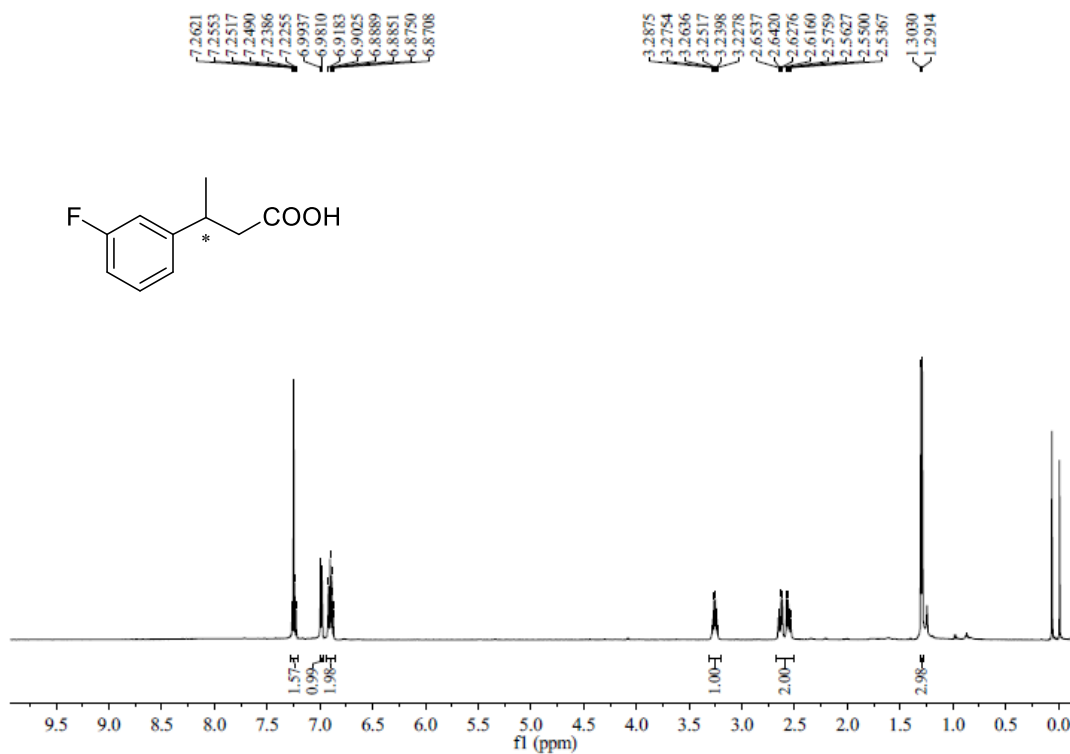

<sup>1</sup>H NMR (600 MHz, Chloroform-*d*)

(-)-3-(3-bromophenyl)butanoic acid (**2f**)

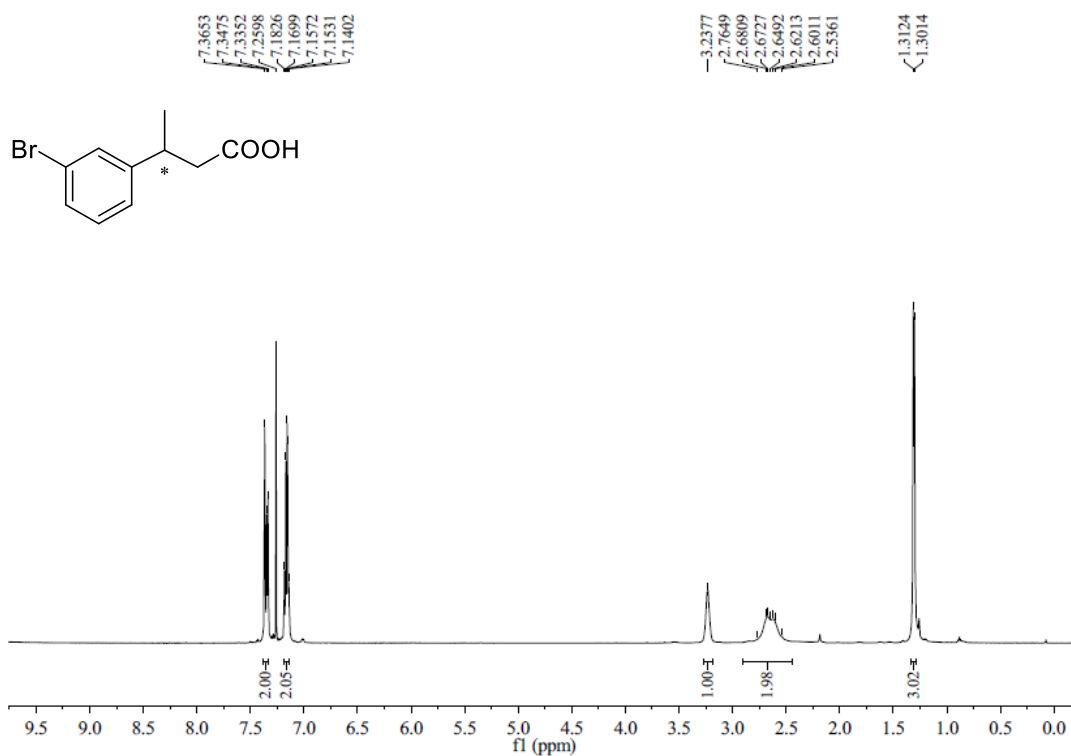

<sup>1</sup>H NMR (600 MHz, Chloroform-*d*)

(-)-3-(4-nitrophenyl)butanoic acid (**2g**)

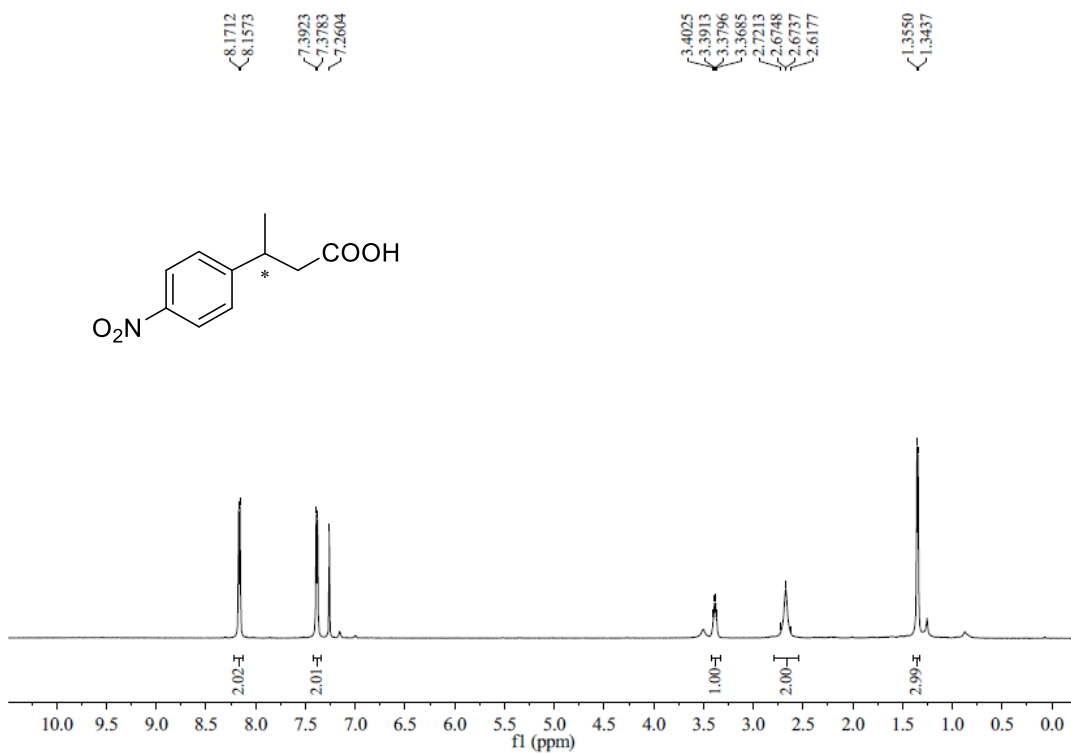

<sup>1</sup>H NMR (600 MHz, Chloroform-*d*)



(-)-3-(4-fluorophenyl)butanoic acid (**2h**)

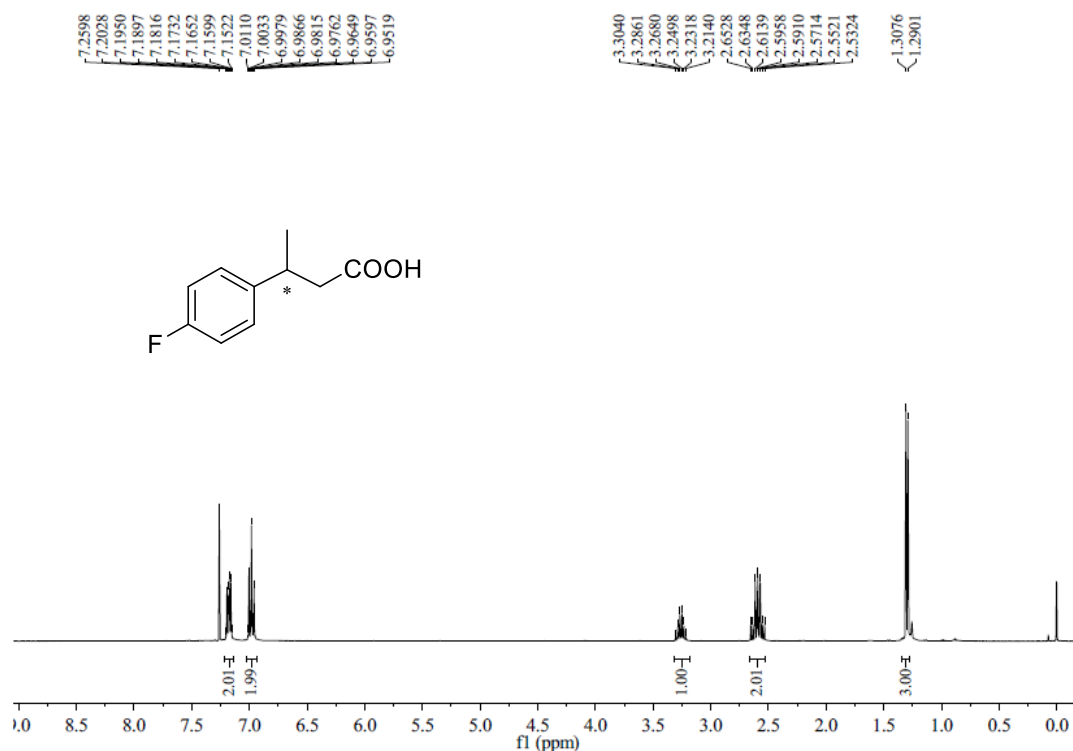

<sup>1</sup>H NMR (400 MHz, Chloroform-*d*)

(-)-3-(4-chlorophenyl)butanoic acid (**2i**)

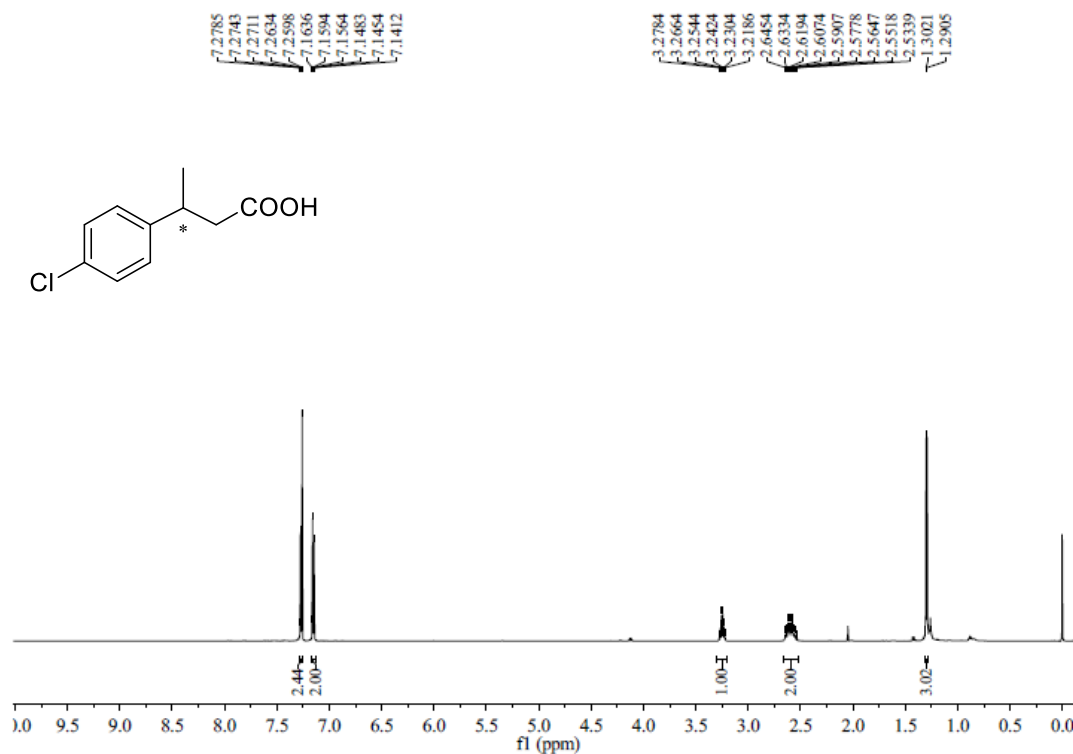

<sup>1</sup>H NMR (600 MHz, Chloroform-*d*)

(-)-3-(*o*-tolyl)butanoic acid (**2j**)

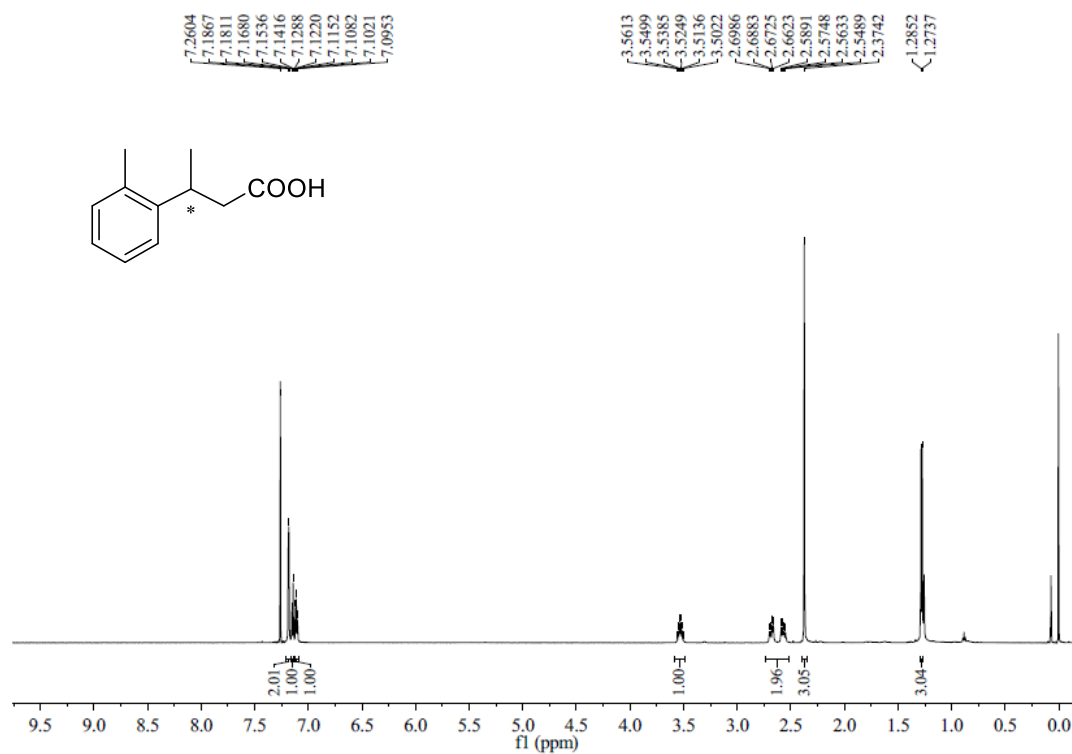

<sup>1</sup>H NMR (600 MHz, Chloroform-*d*)

(-)-3-(*m*-tolyl)butanoic acid (**2k**)

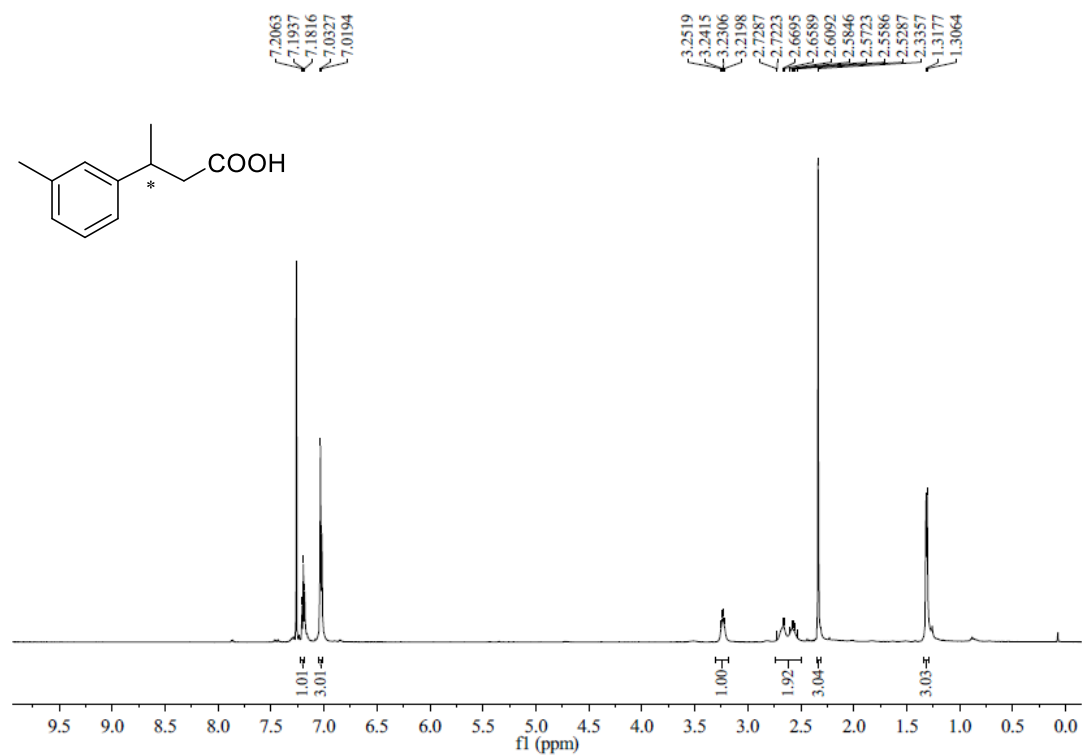

<sup>1</sup>H NMR (600 MHz, Chloroform-*d*)

(*R*)-3-(*p*-tolyl)butanoic acid (**2l**)

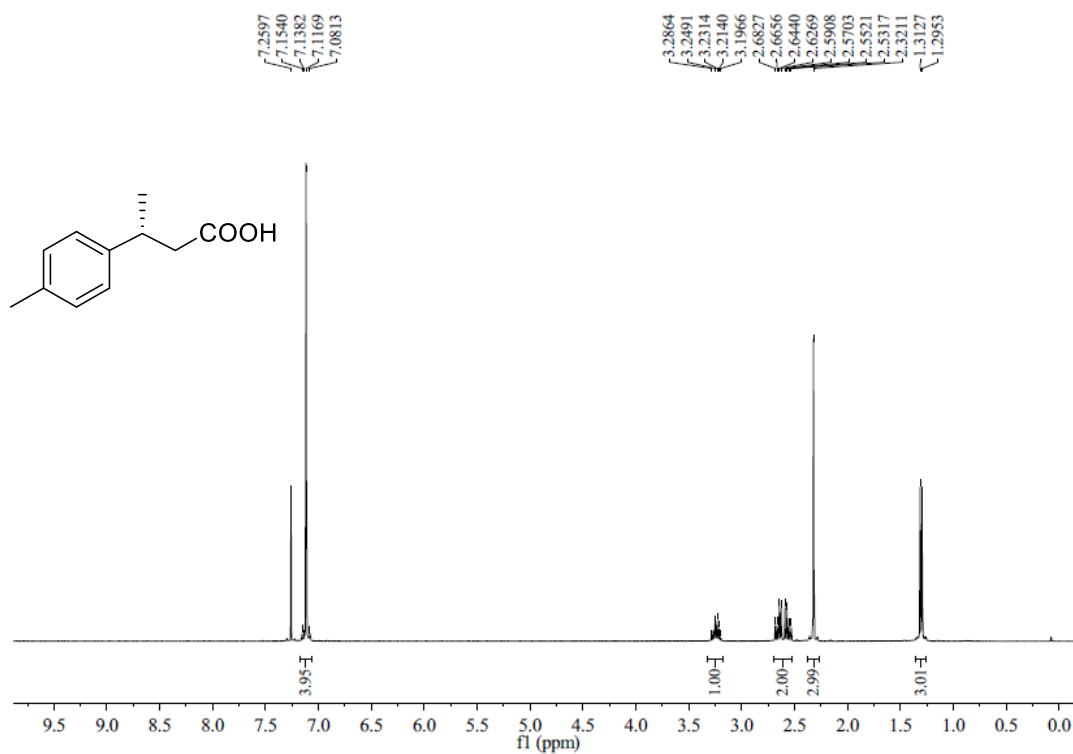

<sup>1</sup>H NMR (400 MHz, Chloroform-*d*)

(-)-3-(naphthalen-2-yl)butanoic acid (**2m**)

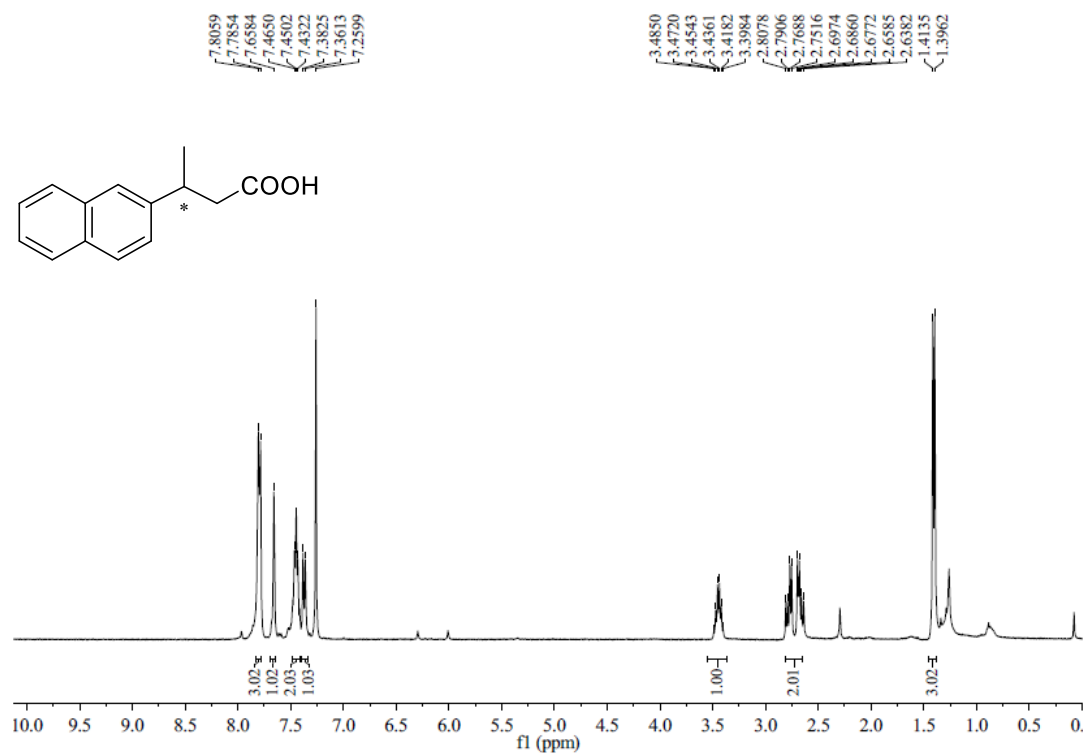

<sup>1</sup>H NMR (400 MHz, Chloroform-*d*)

(*R*)-3-phenylbutanoic acid (**2n**)

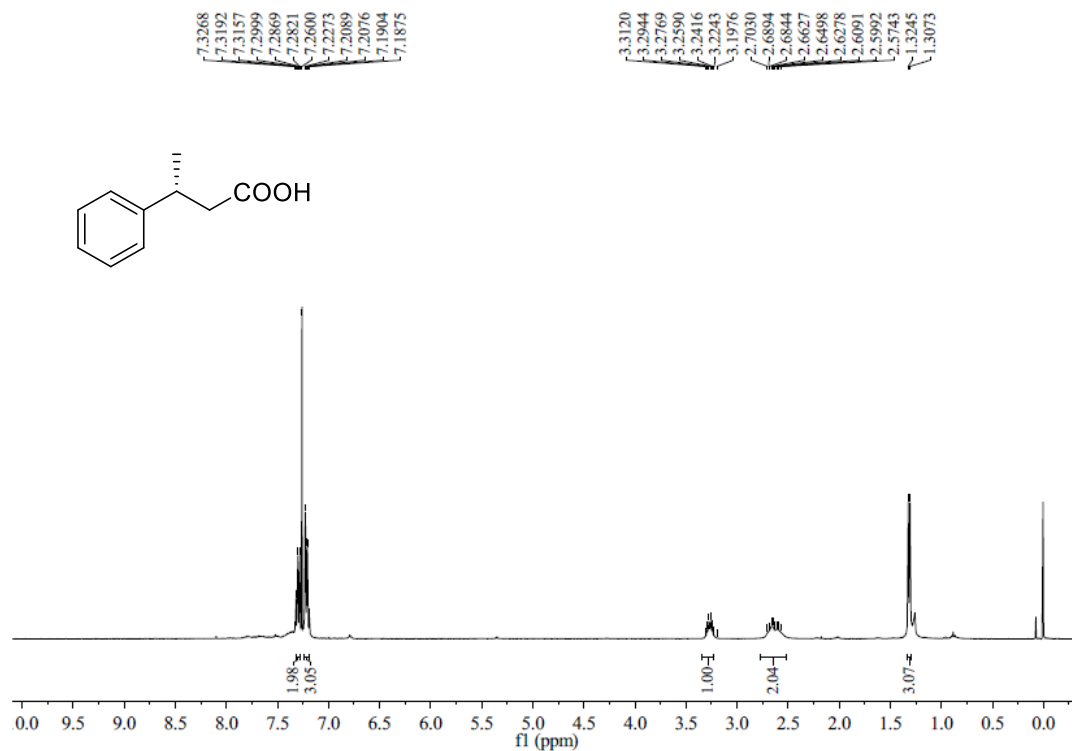

<sup>1</sup>H NMR (400 MHz, Chloroform-*d*)

(*R*)-3-phenylpentanoic acid (**2o**)

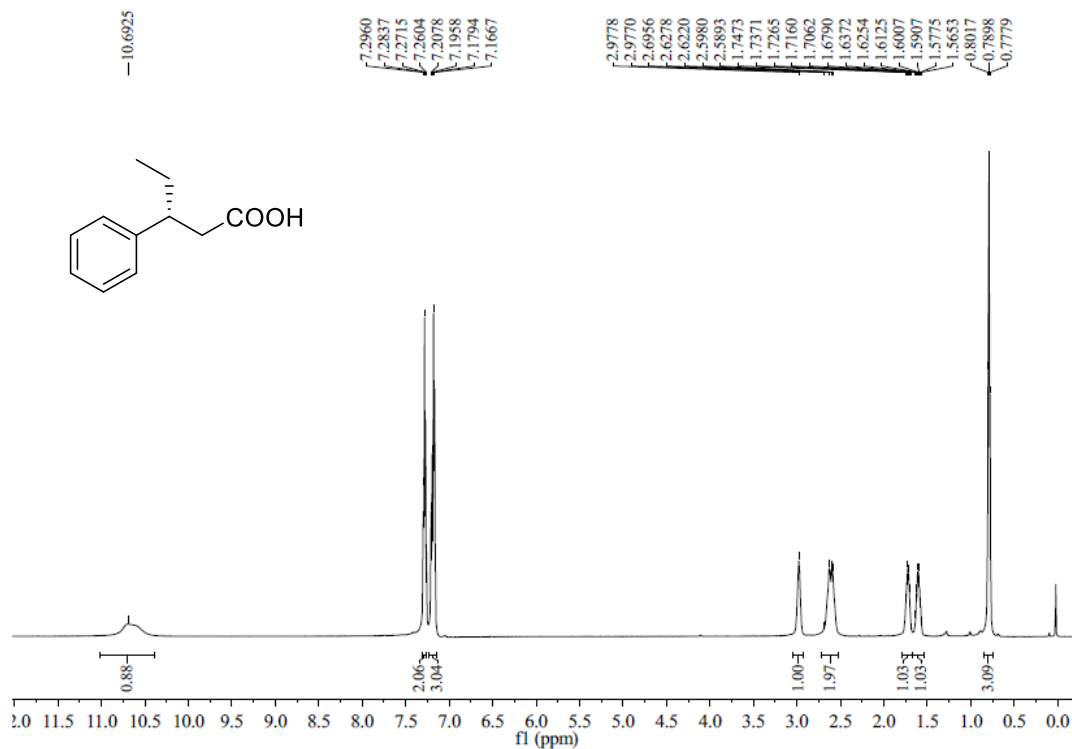

<sup>1</sup>H NMR (600 MHz, Chloroform-*d*)

(S)-4-methyl-3-phenylpentanoic acid (**2p**)

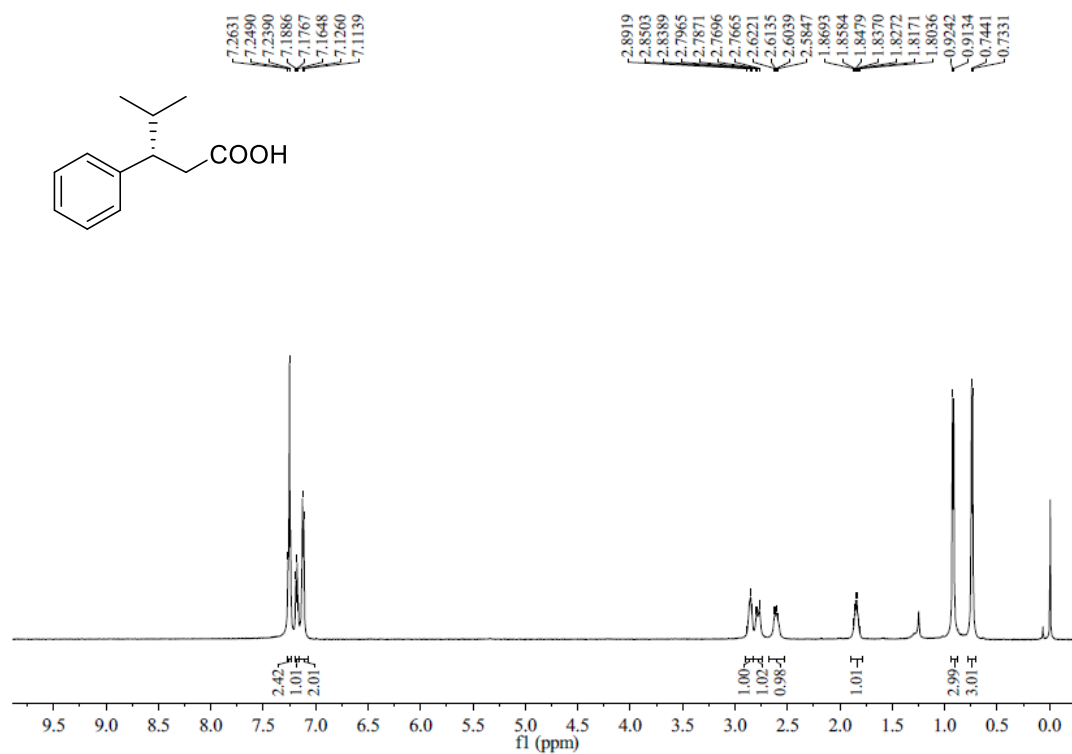

<sup>1</sup>H NMR (600 MHz, Chloroform-*d*)

(S)-3-cyclohexyl-3-phenylpropanoic acid (**2q**)

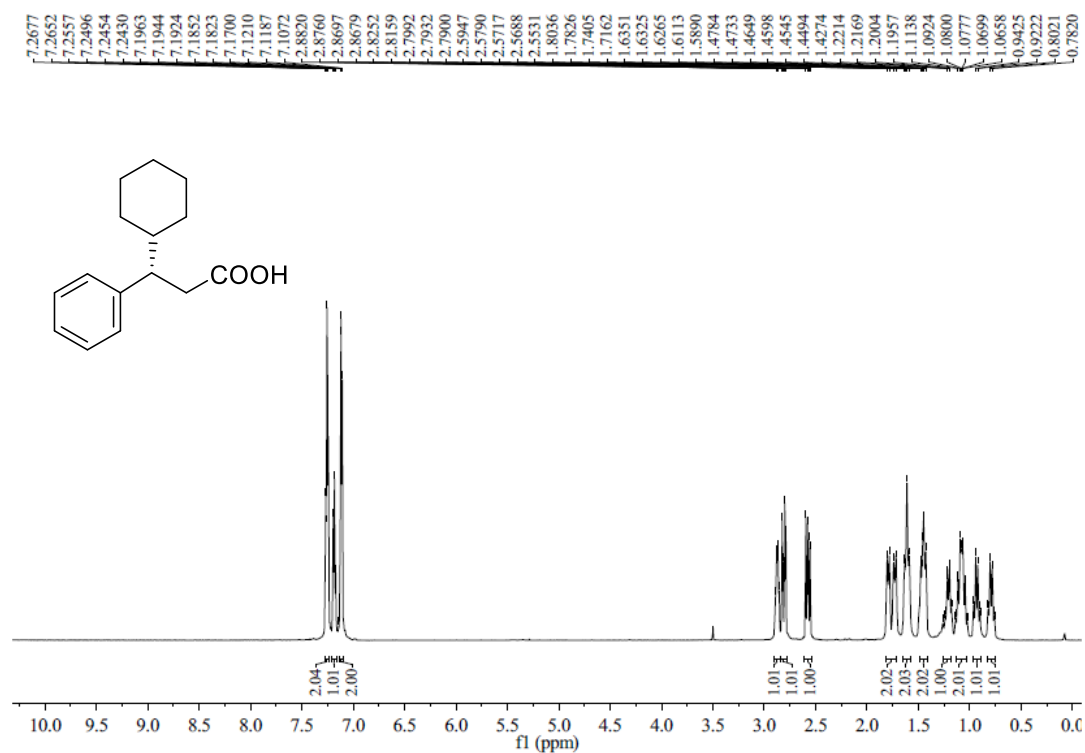

<sup>1</sup>H NMR (600 MHz, Chloroform-*d*)

(*S*)-3-phenylpentanoic acid (**2r**)

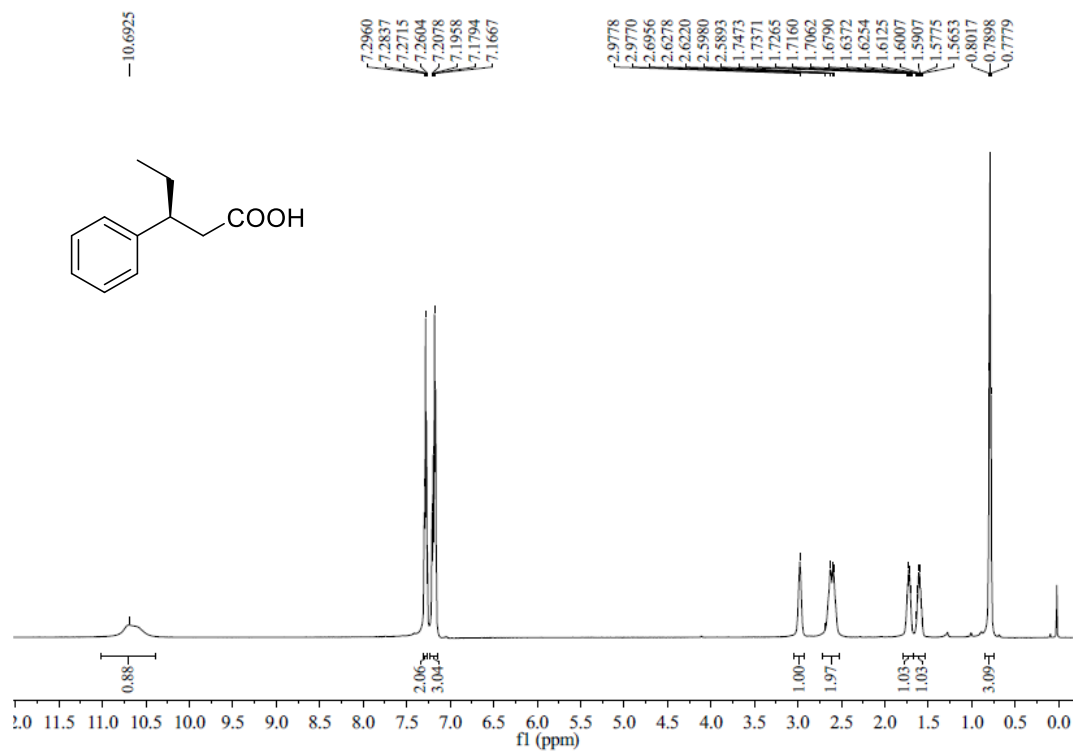

<sup>1</sup>H NMR (600 MHz, Chloroform-*d*)

(*R*)-4-methyl-3-phenylpentanoic acid (**2s**)

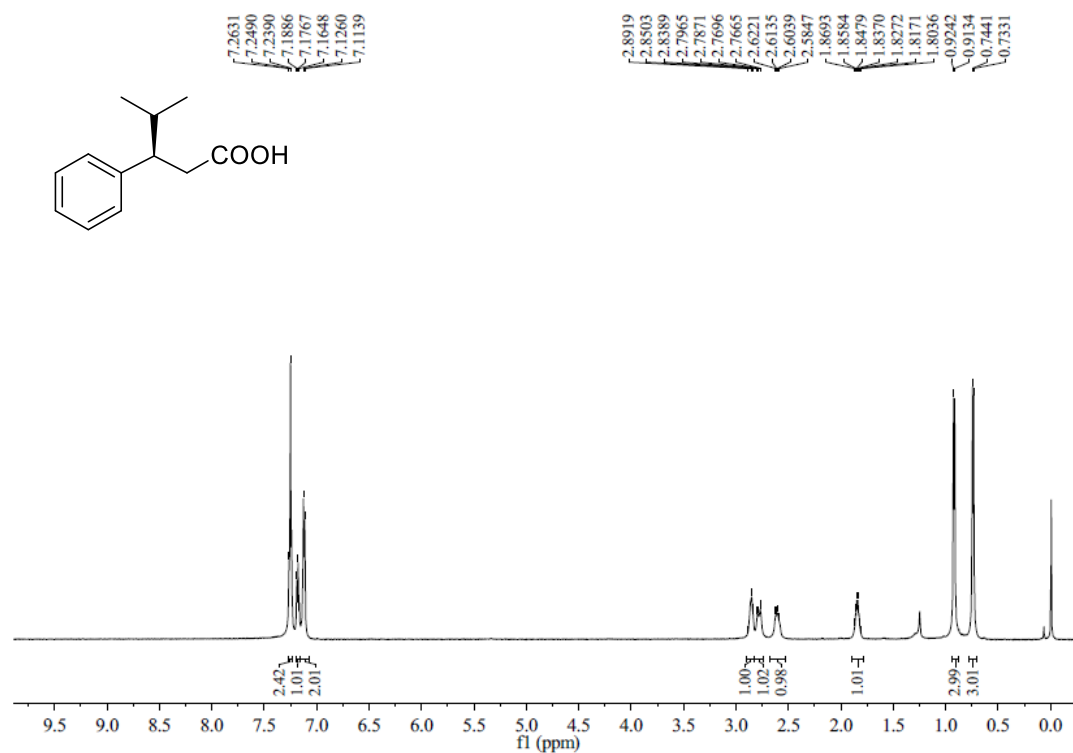

<sup>1</sup>H NMR (600 MHz, Chloroform-*d*)

(-)-3-phenyl-3-(*o*-tolyl)propanoic acid (**2t**)

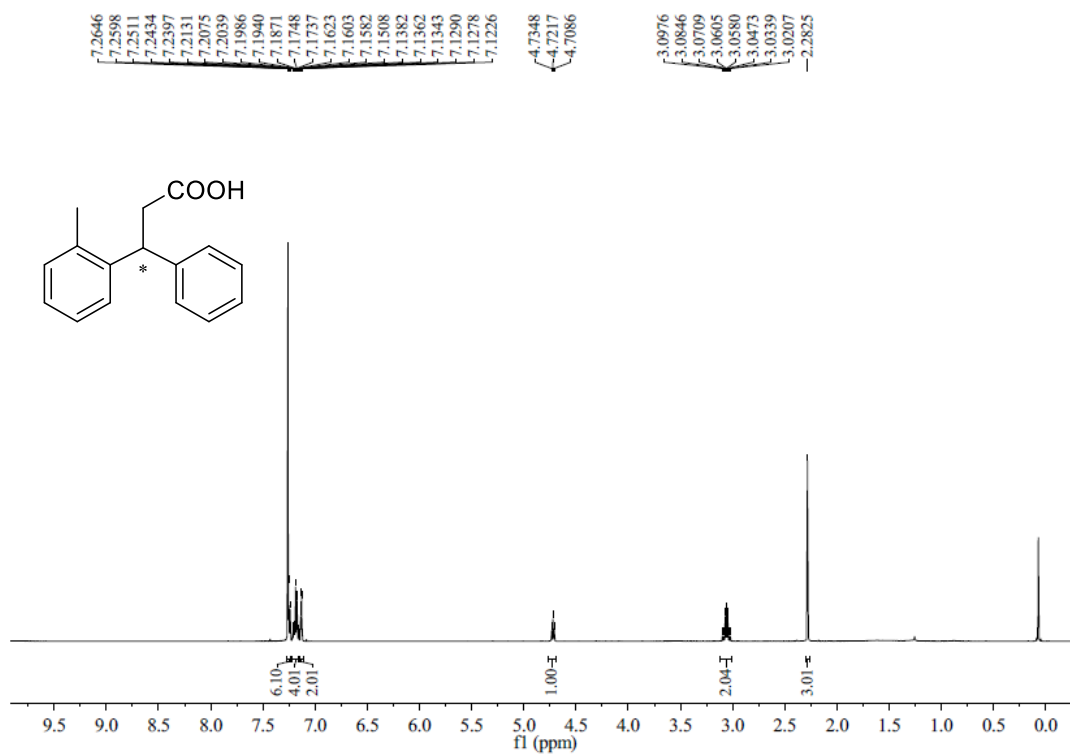

<sup>1</sup>H NMR (600 MHz, Chloroform-*d*)

(-)-ethyl 3-(2-fluorophenyl)butanoate (**2u**)

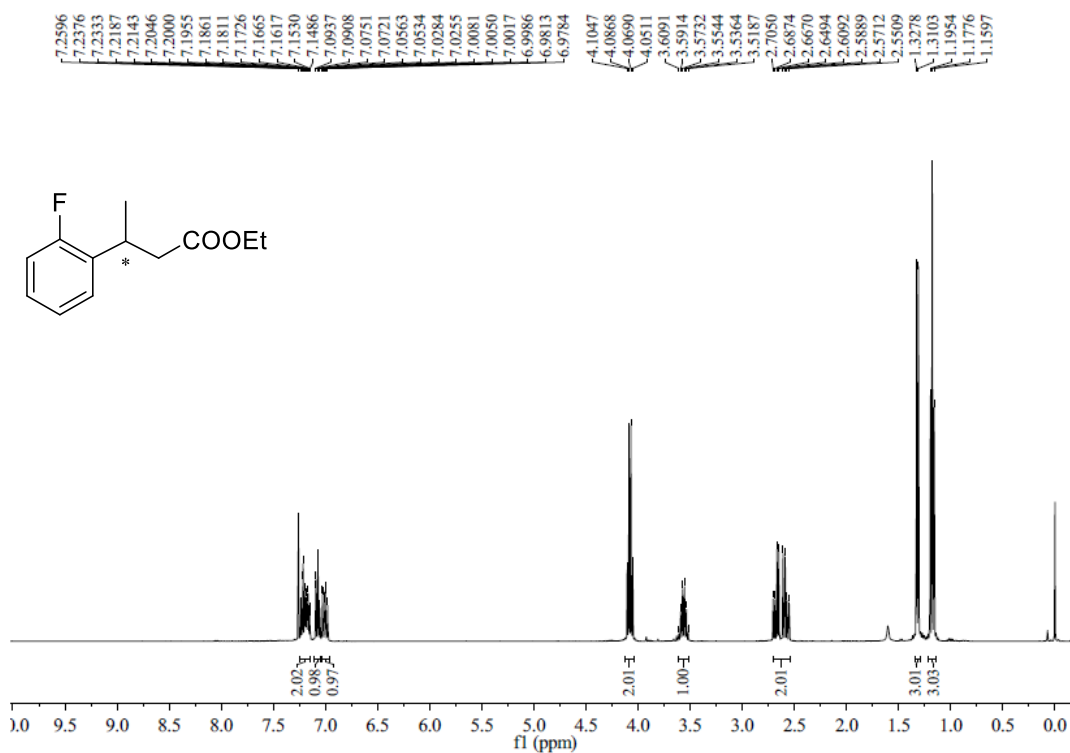

<sup>1</sup>H NMR (400 MHz, Chloroform-*d*)

(*R*)-3-phenylbutan-1-ol (**3**)

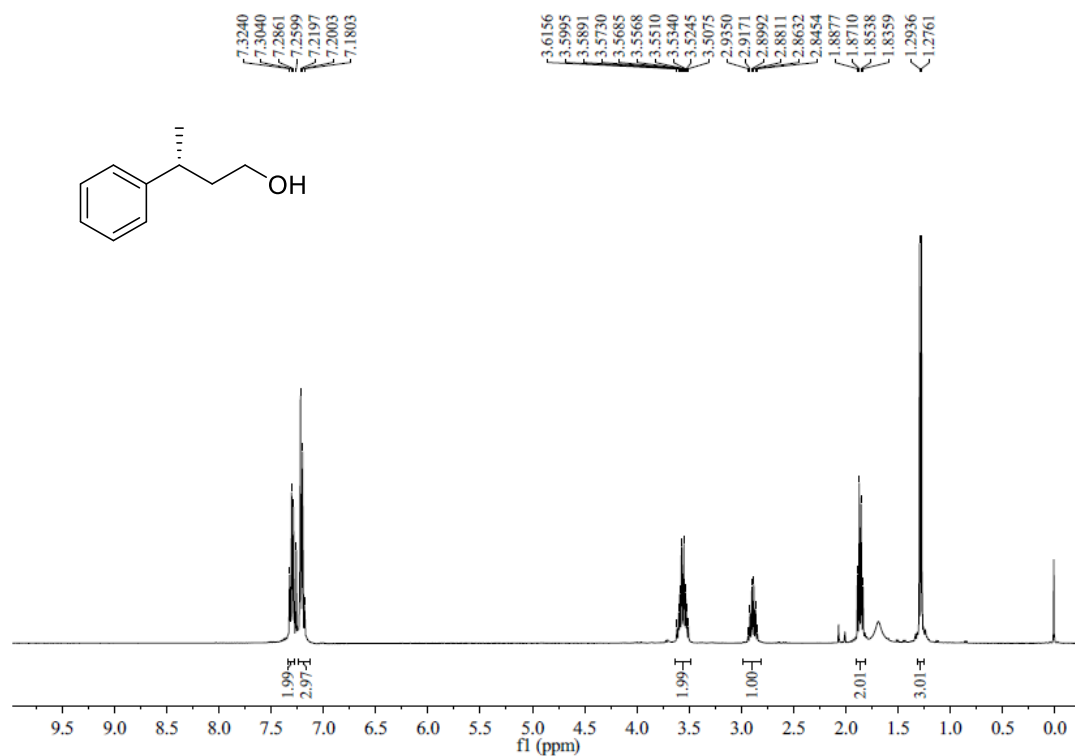

<sup>1</sup>H NMR (400 MHz, Chloroform-*d*)

(*R*)-3-methyl-2,3-dihydro-1*H*-inden-1-one (**4**)

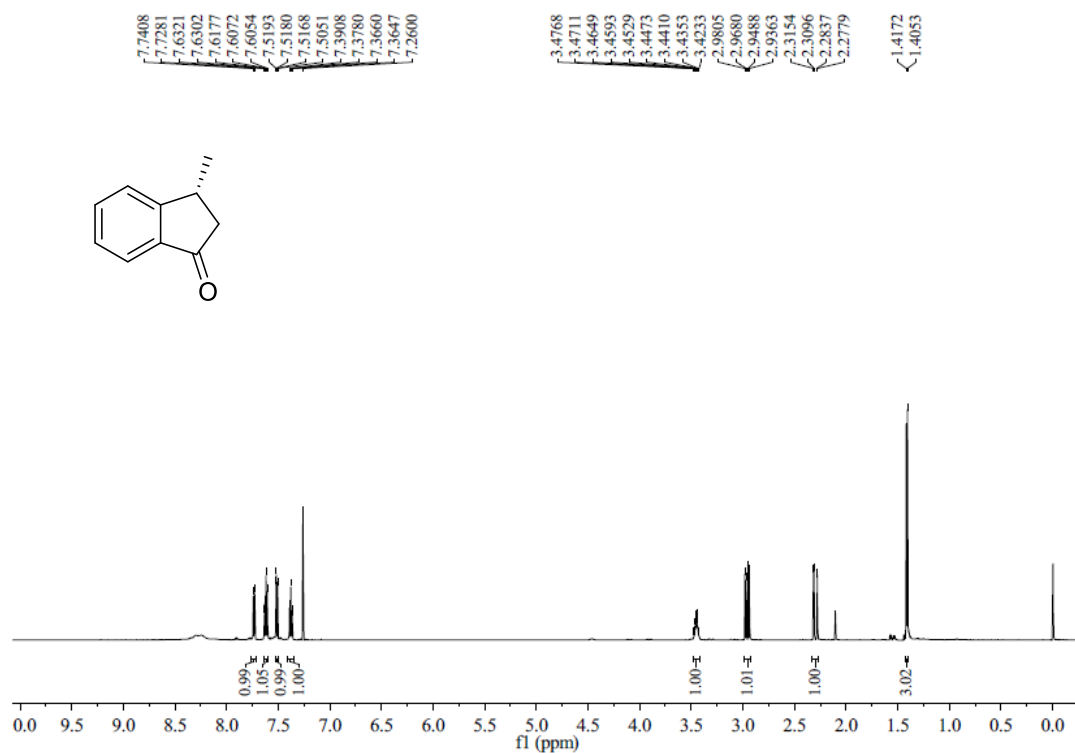

<sup>1</sup>H NMR (600 MHz, Chloroform-*d*)



(1*S*,3*R*)-3-methyl-2,3-dihydro-1*H*-inden-1-ol (**5**)

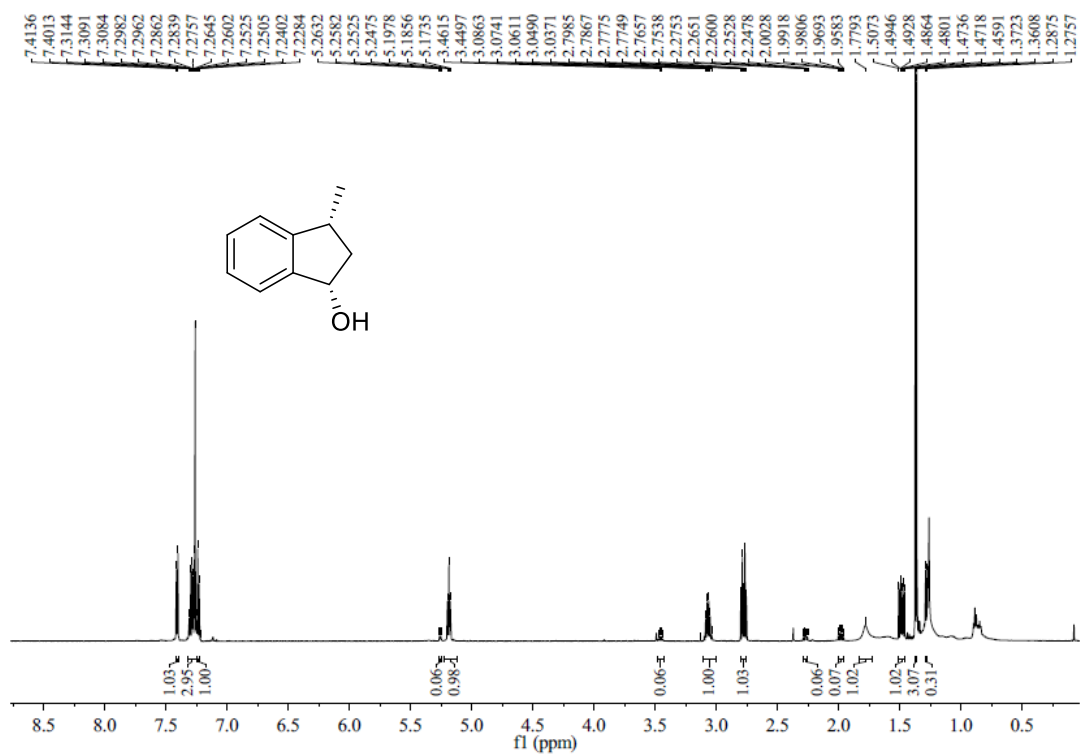

<sup>1</sup>H NMR (600 MHz, Chloroform-*d*)

(*R*)-3-ethyl-2,3-dihydro-1*H*-inden-1-one (**6**)

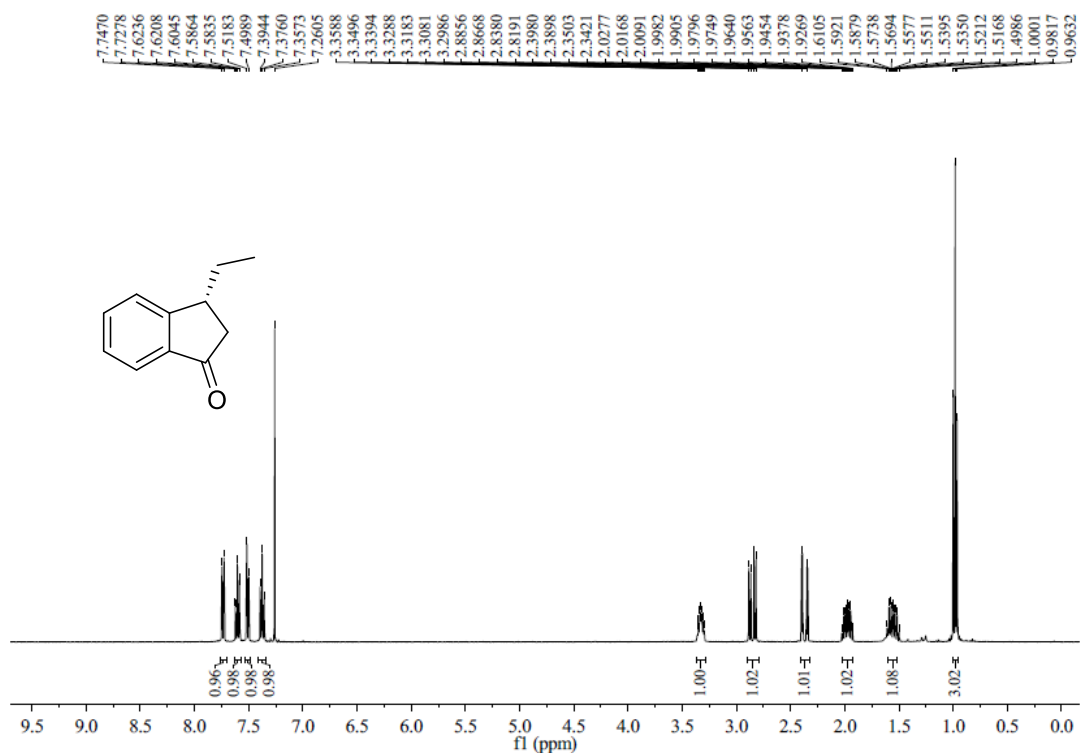

<sup>1</sup>H NMR (400 MHz, Chloroform-*d*)

(*R*)-3-ethyl-2,3-dihydro-1*H*-inden-1-one oxime (**7**)

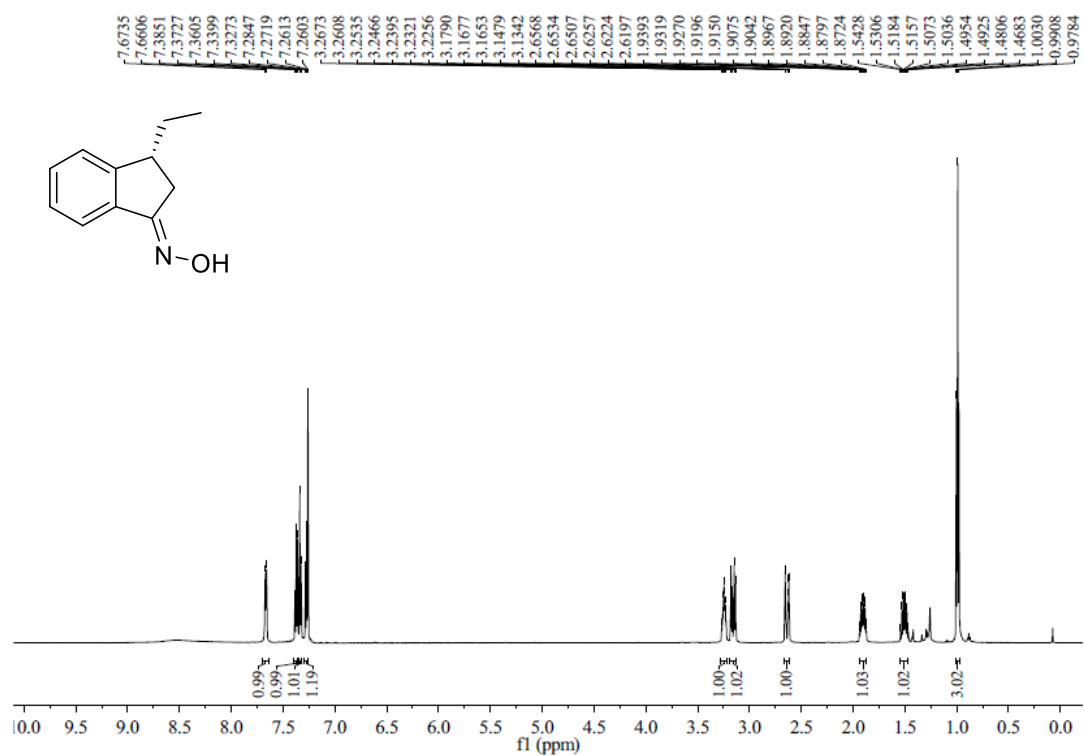

<sup>1</sup>H NMR (400 MHz, Chloroform-*d*)

(*R*)-4-ethyl-1,2,3,4-tetrahydroquinoline (**8**)

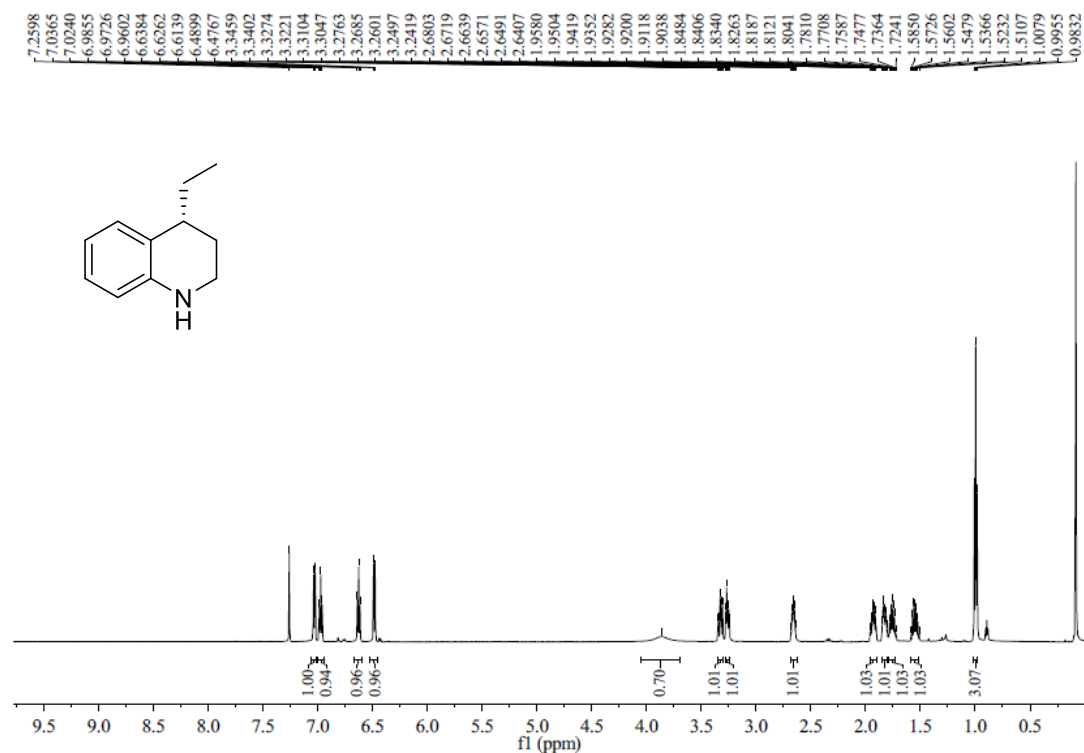

<sup>1</sup>H NMR (600 MHz, Chloroform-*d*)

(+)-3-(2-fluorophenyl)butanoic acid (**2a**)

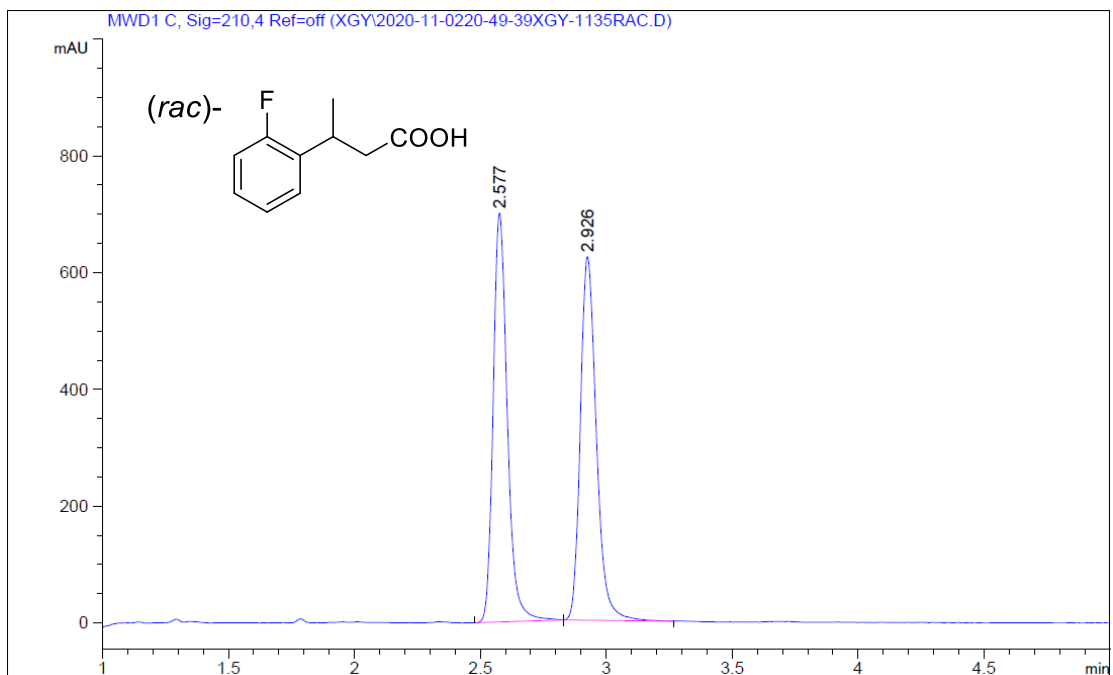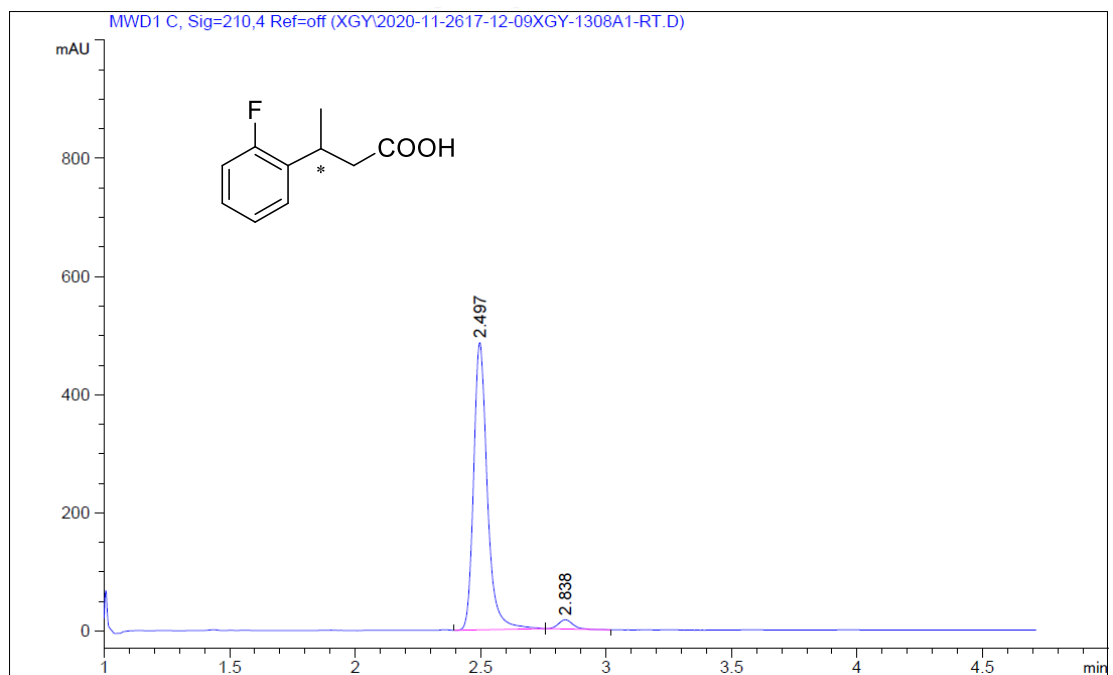

Signal 1: MWD1 C, Sig=210,4 Ref=off

| Peak # | RetTime [min] | Type | Width [min] | Area [mAU*s] | Height [mAU] | Area %  |
|--------|---------------|------|-------------|--------------|--------------|---------|
| 1      | 2.497         | BB   | 0.0578      | 1845.43042   | 486.19901    | 96.6801 |
| 2      | 2.838         | BB   | 0.0620      | 63.36998     | 15.57936     | 3.3199  |

(-)-3-(2-fluorophenyl)butanoic acid (**2b**)

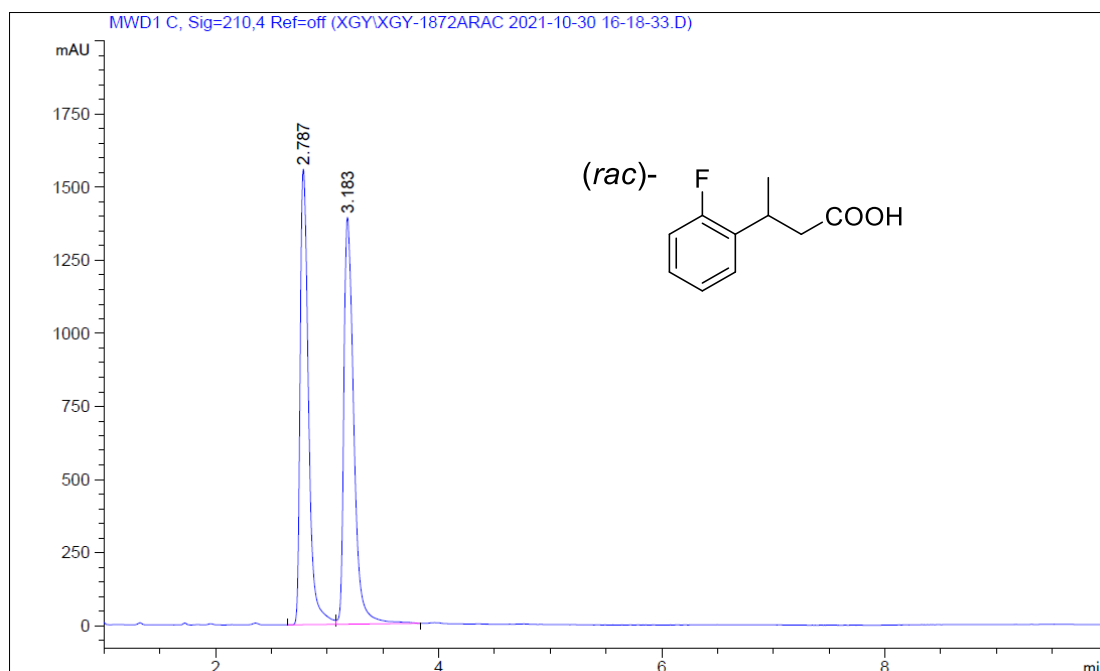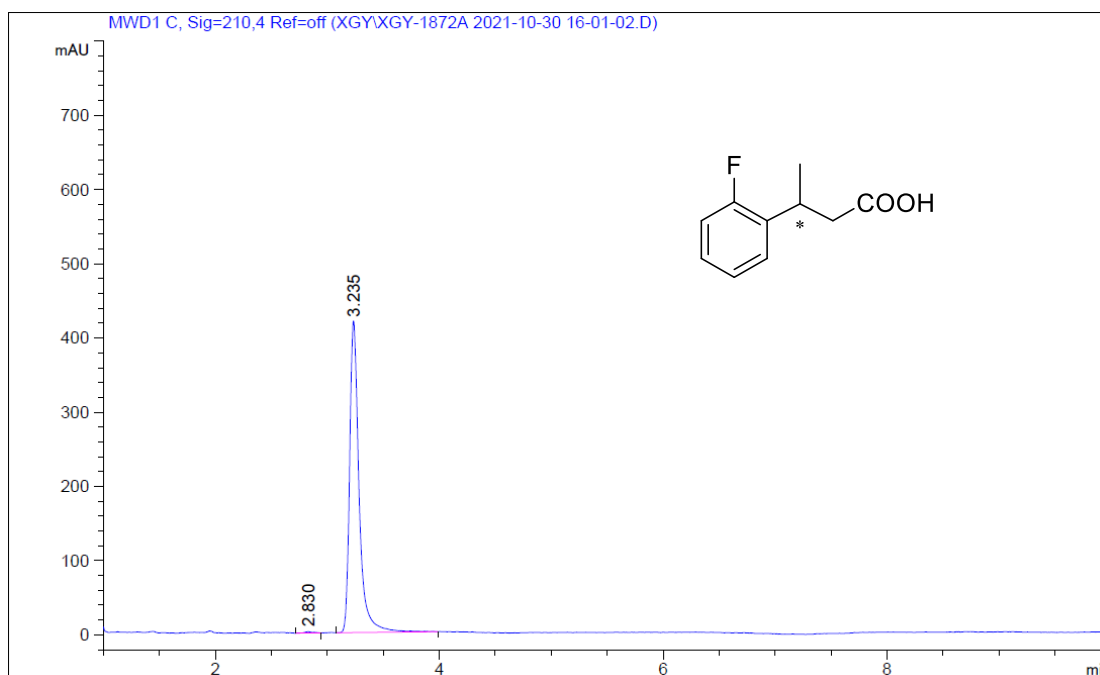

Signal 1: MWD1 C, Sig=210,4 Ref=off

| Peak # | RetTime [min] | Type | Width [min] | Area [mAU*s] | Height [mAU] | Area %  |
|--------|---------------|------|-------------|--------------|--------------|---------|
| 1      | 2.830         | BB   | 0.0738      | 9.57644      | 1.86971      | 0.3867  |
| 2      | 3.235         | BB   | 0.0887      | 2466.88428   | 419.02966    | 99.6133 |

(-)-3-(2-chlorophenyl)butanoic acid (**2c**)

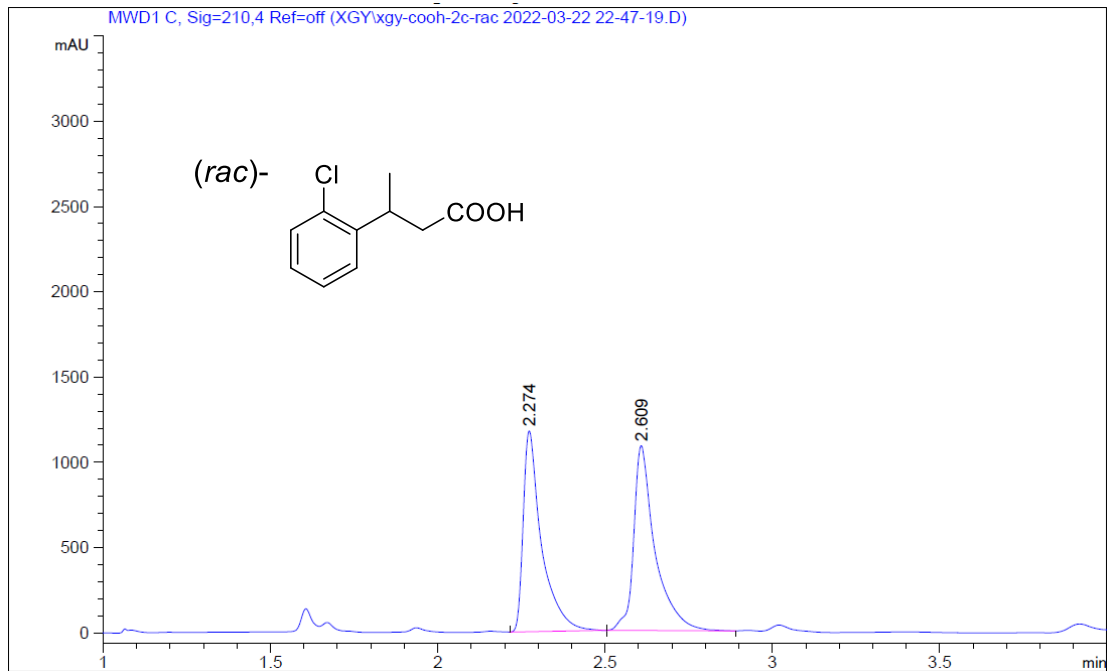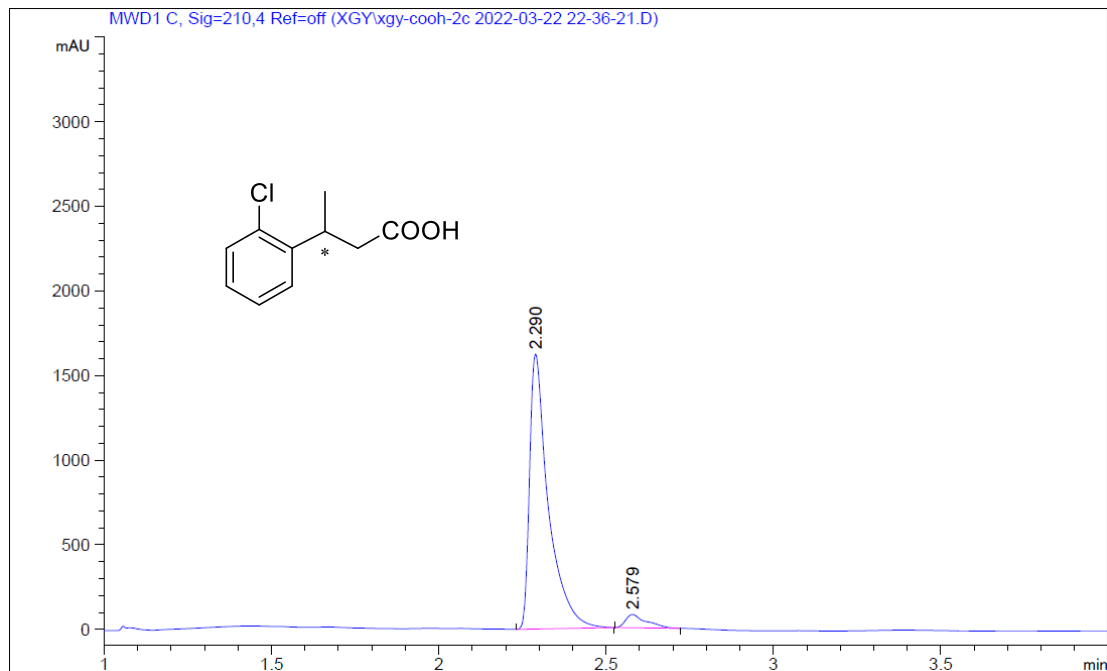

Signal 1: MWD1 C, Sig=210,4 Ref=off

| Peak # | RetTime [min] | Type | Width [min] | Area [mAU*s] | Height [mAU] | Area %  |
|--------|---------------|------|-------------|--------------|--------------|---------|
| 1      | 2.290         | BB   | 0.0566      | 6347.92188   | 1625.02527   | 94.9215 |
| 2      | 2.579         | BB   | 0.0607      | 339.62582    | 78.87069     | 5.0785  |

(-)-3-(3-nitrophenyl)butanoic acid (**2d**)

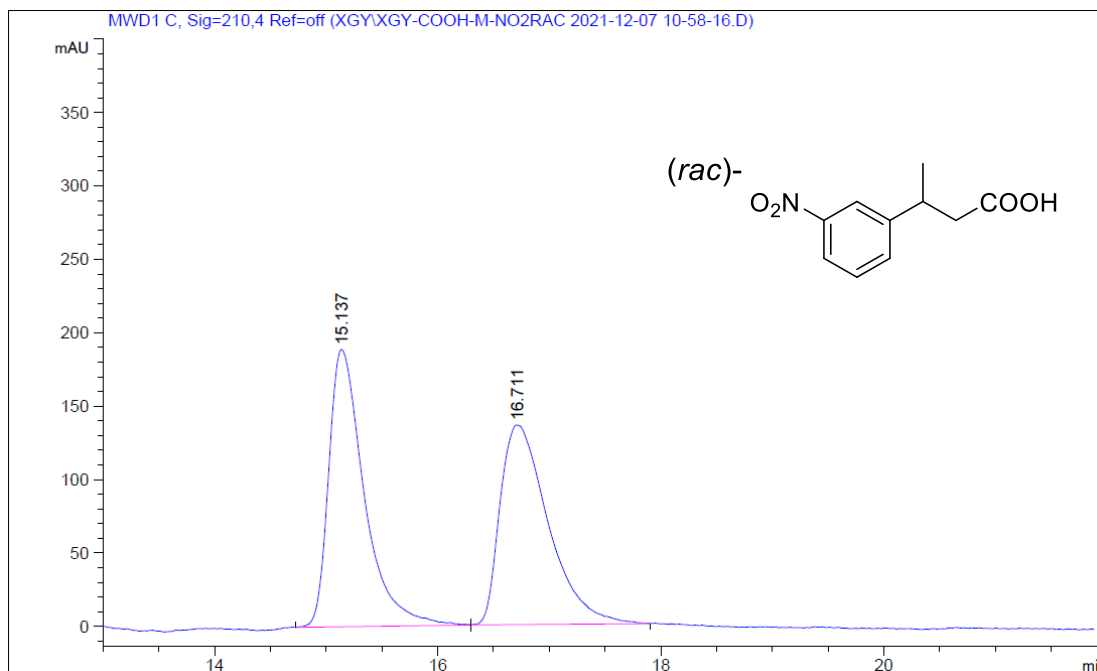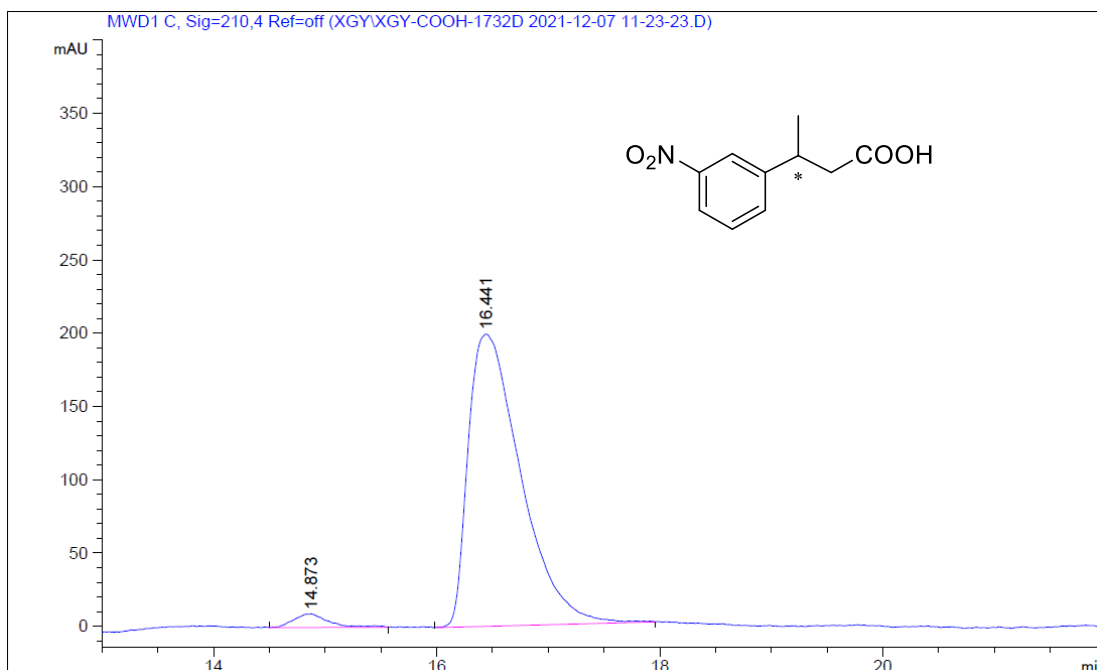

Signal 1: MWD1 C, Sig=210,4 Ref=off

| Peak # | RetTime [min] | Type | Width [min] | Area [mAU*s] | Height [mAU] | Area %  |
|--------|---------------|------|-------------|--------------|--------------|---------|
| 1      | 14.873        | VV R | 0.2560      | 201.89615    | 9.34520      | 3.0055  |
| 2      | 16.441        | BV R | 0.3936      | 6515.66162   | 199.44106    | 96.9945 |

(-)-3-(3-fluorophenyl)butanoic acid (**2e**)

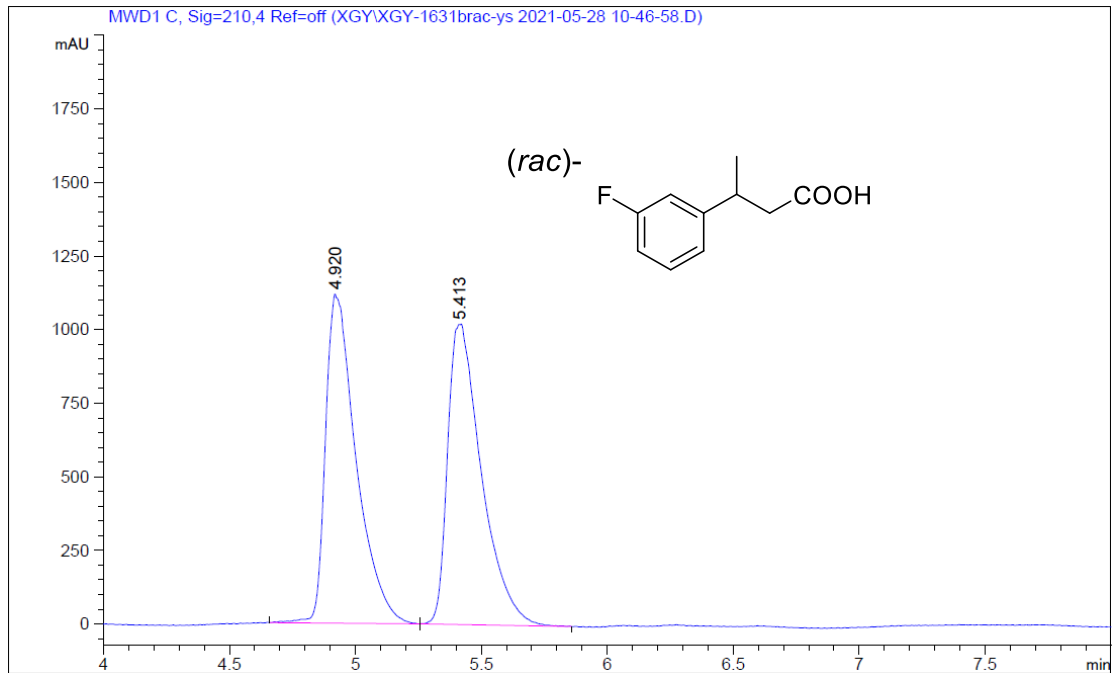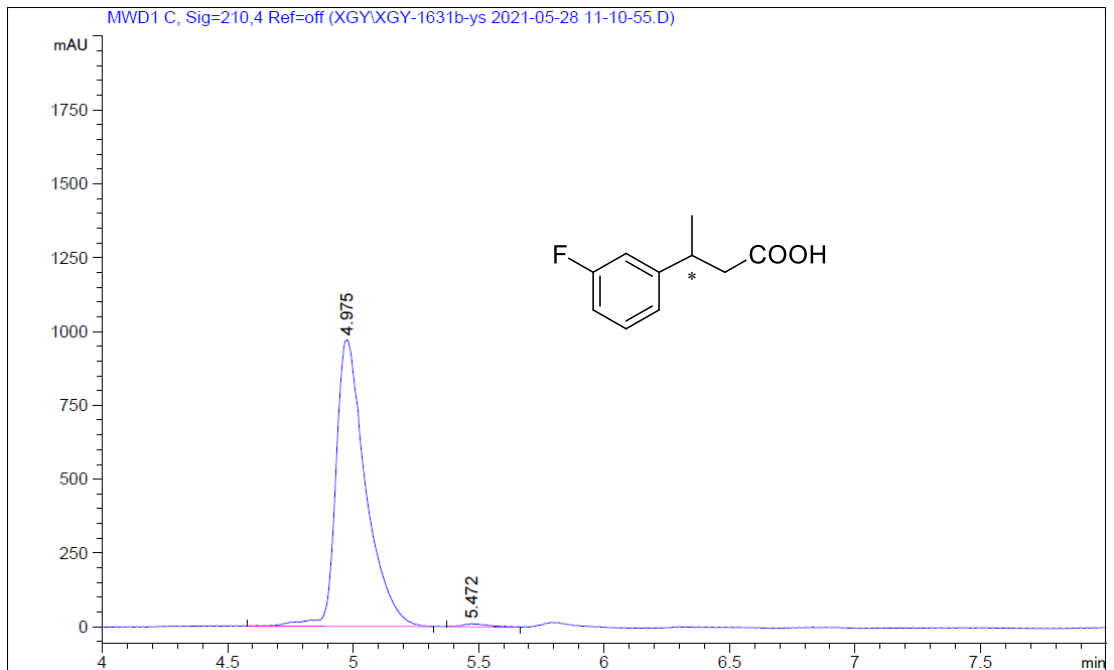

Signal 1: MWD1 C, Sig=210,4 Ref=off

| Peak # | RetTime [min] | Type | Width [min] | Area [mAU*s] | Height [mAU] | Area %  |
|--------|---------------|------|-------------|--------------|--------------|---------|
| 1      | 4.975         | VB R | 0.1156      | 8038.21484   | 970.13336    | 99.0175 |
| 2      | 5.472         | BB   | 0.0872      | 79.75824     | 11.05405     | 0.9825  |

(-)-3-(3-bromophenyl)butanoic acid (2f)

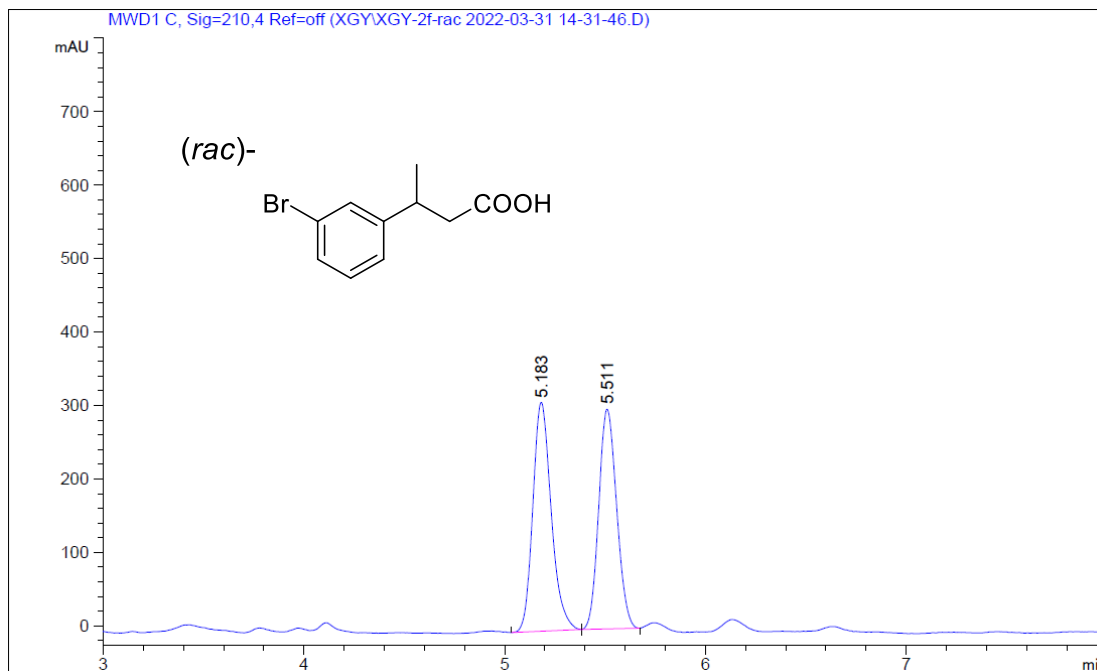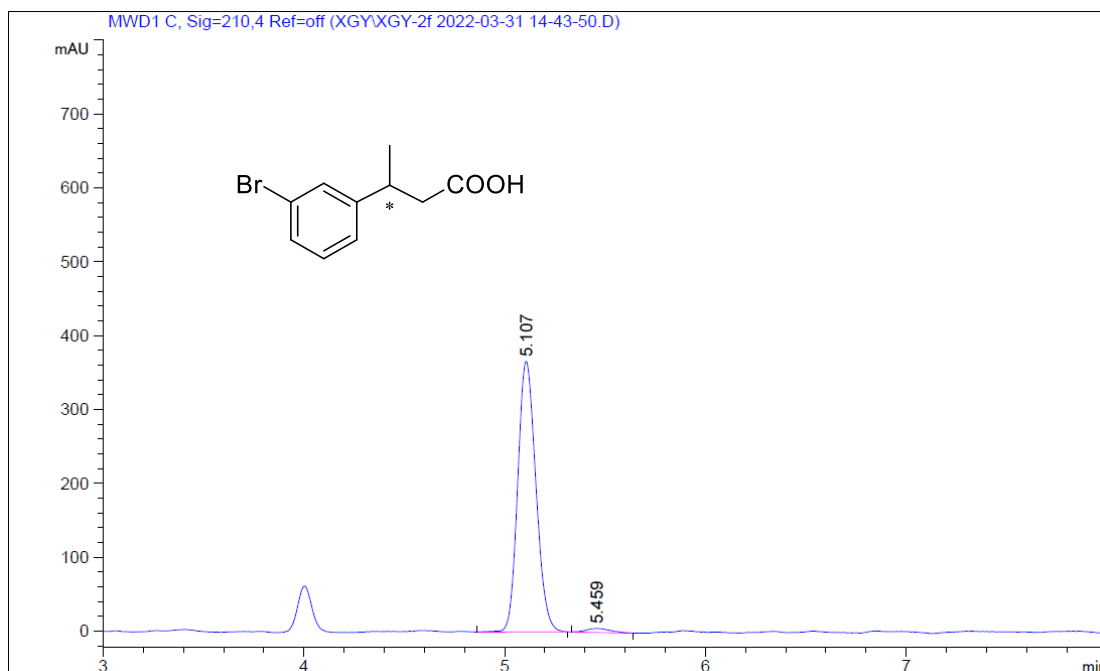

Signal 1: MWD1 C, Sig=210,4 Ref=off

| Peak # | RetTime [min] | Type | Width [min] | Area [mAU*s] | Height [mAU] | Area %  |
|--------|---------------|------|-------------|--------------|--------------|---------|
| 1      | 5.107         | VV R | 0.0969      | 2303.96924   | 366.36096    | 98.0535 |
| 2      | 5.459         | VV R | 0.0976      | 45.73698     | 5.52417      | 1.9465  |



(-)-3-(4-nitrophenyl)butanoic acid (**2g**)

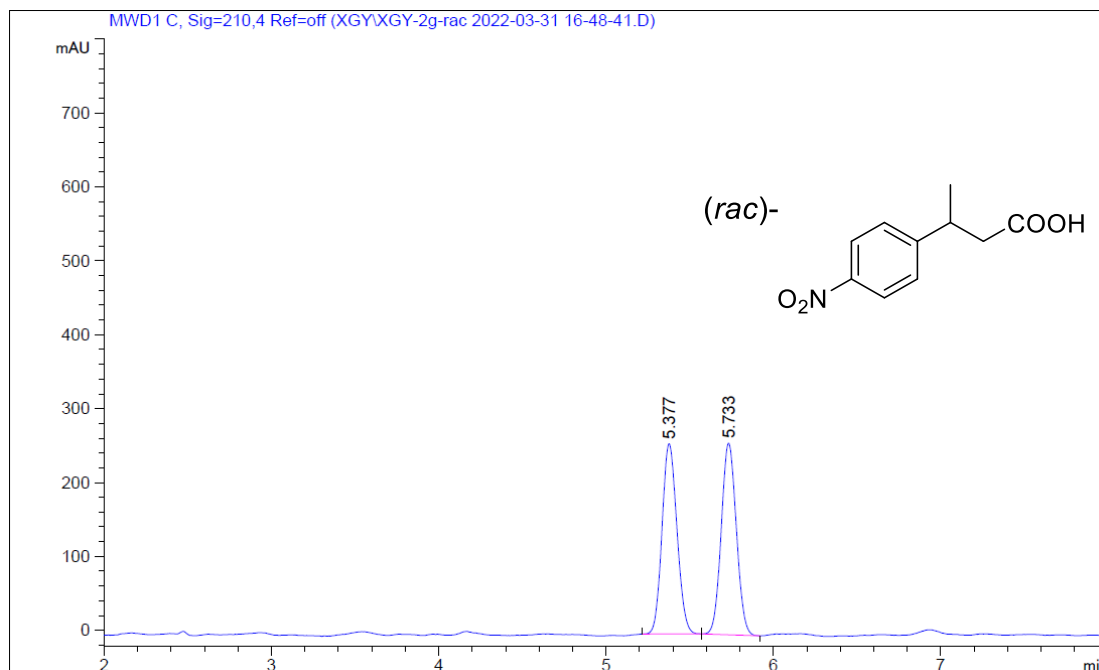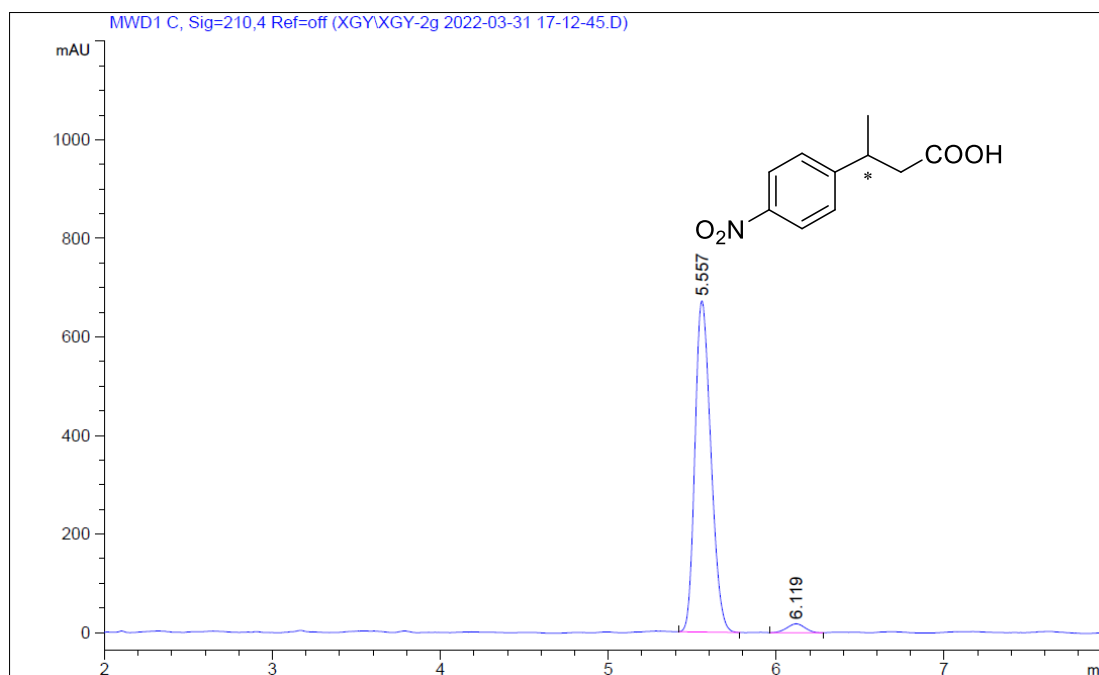

Signal 1: MWD1 C, Sig=210,4 Ref=off

| Peak # | RetTime [min] | Type | Width [min] | Area [mAU*s] | Height [mAU] | Area %  |
|--------|---------------|------|-------------|--------------|--------------|---------|
| 1      | 5.557         | BB   | 0.1034      | 4430.71729   | 672.00006    | 97.0722 |
| 2      | 6.119         | BB   | 0.0993      | 133.63306    | 18.06862     | 2.9278  |

(-)-3-(4-fluorophenyl)butanoic acid (**2h**)

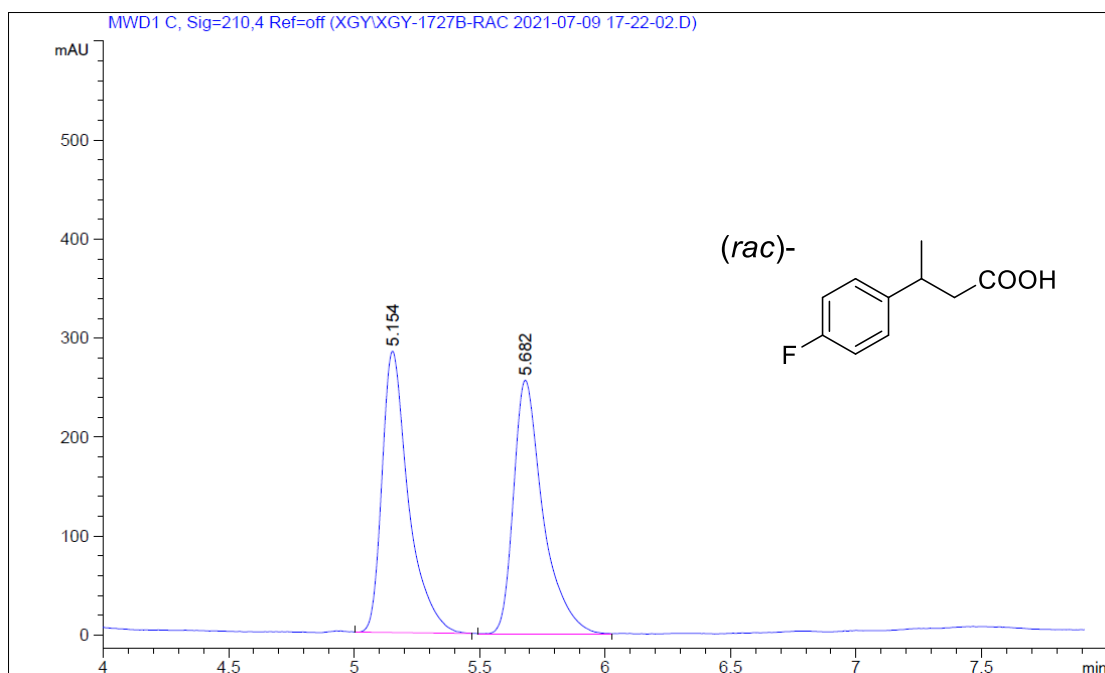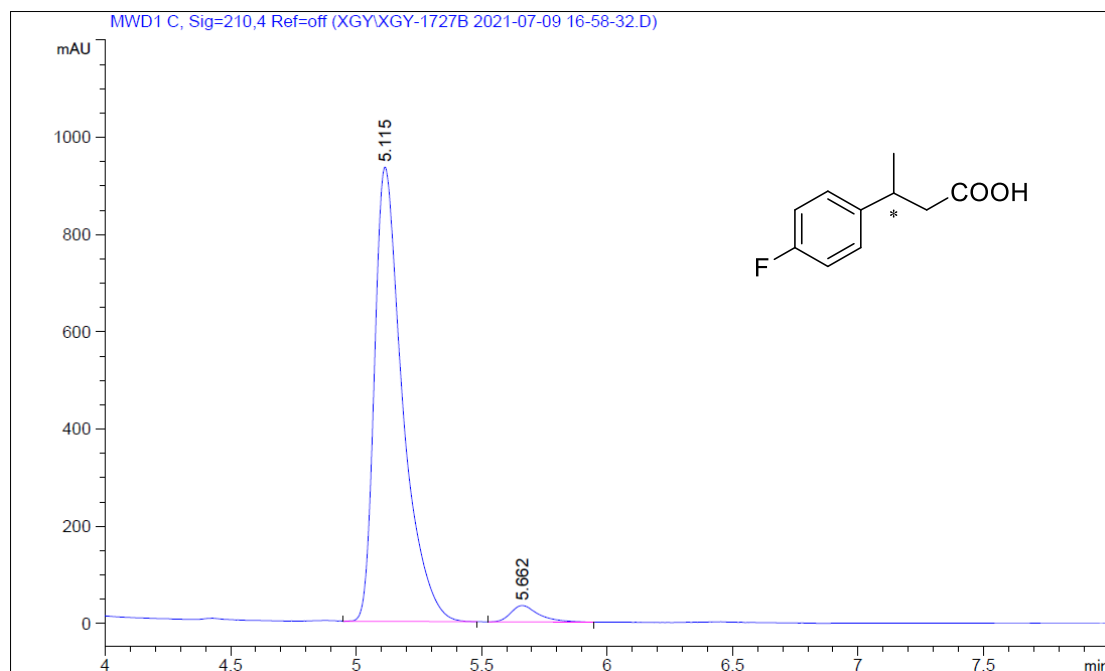

Signal 1: MWD1 C, Sig=210,4 Ref=off

| Peak # | RetTime [min] | Type | Width [min] | Area [mAU*s] | Height [mAU] | Area %  |
|--------|---------------|------|-------------|--------------|--------------|---------|
| 1      | 5.115         | BV R | 0.1162      | 7268.42871   | 934.46948    | 96.5317 |
| 2      | 5.662         | BV R | 0.1119      | 261.14706    | 33.89094     | 3.4683  |

(-)-3-(4-chlorophenyl)butanoic acid (**2i**)

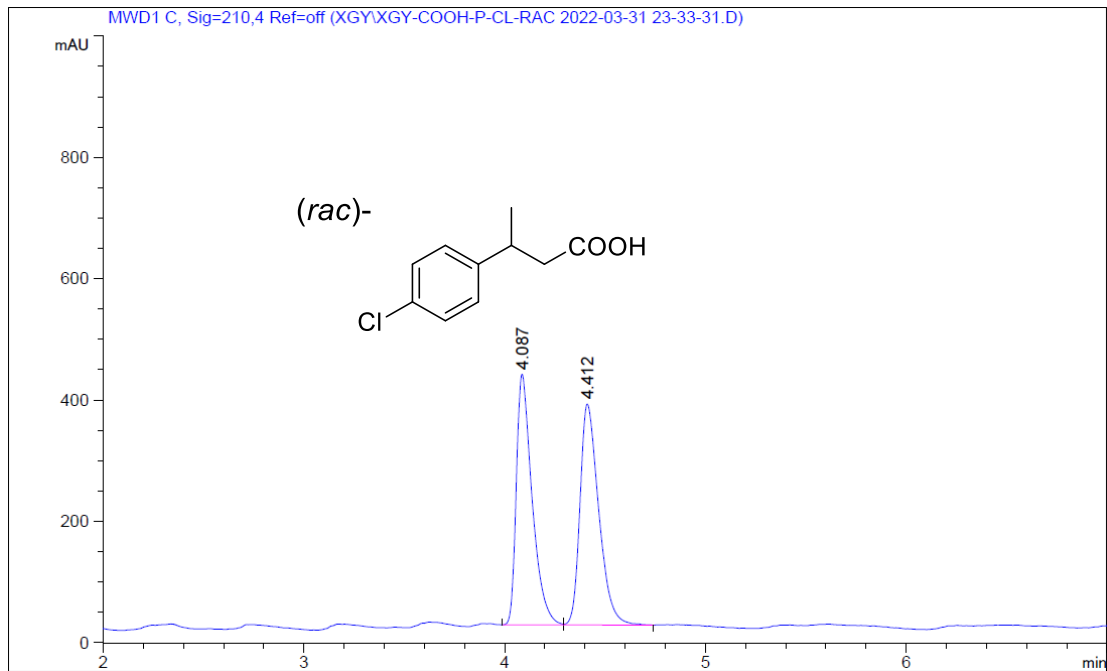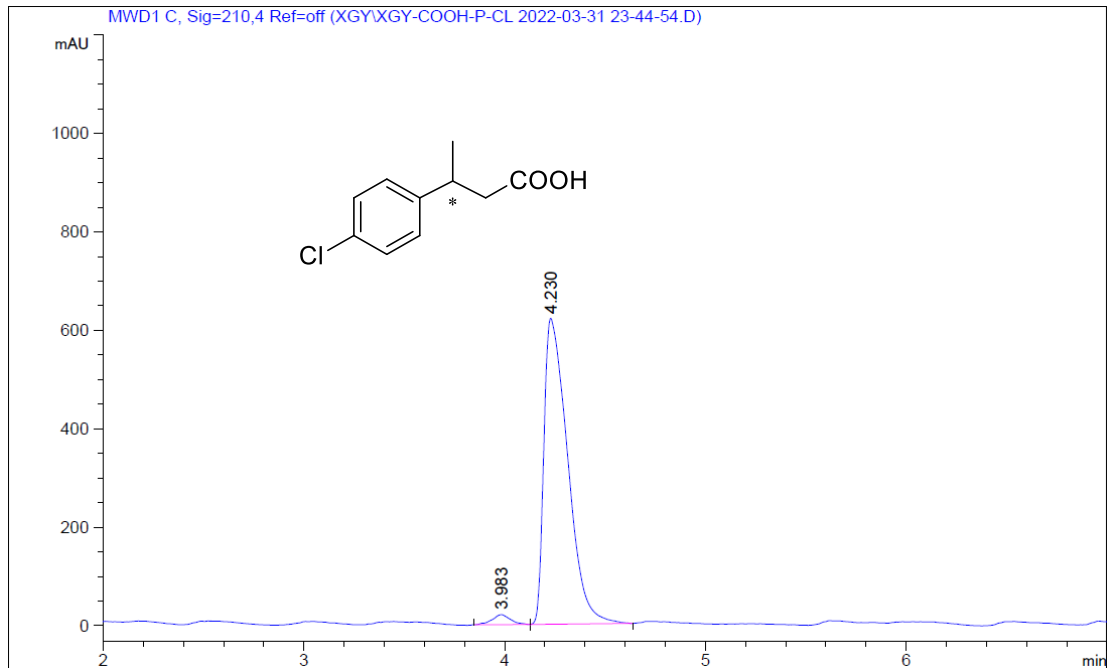

Signal 1: MWD1 C, Sig=210,4 Ref=off

| Peak # | RetTime [min] | Type | Width [min] | Area [mAU*s] | Height [mAU] | Area %  |
|--------|---------------|------|-------------|--------------|--------------|---------|
| 1      | 3.983         | BB   | 0.0882      | 126.88873    | 20.37037     | 2.4259  |
| 2      | 4.230         | BB   | 0.1203      | 5103.78125   | 621.33539    | 97.5741 |

(-)-3-(*o*-tolyl)butanoic acid (**2j**)

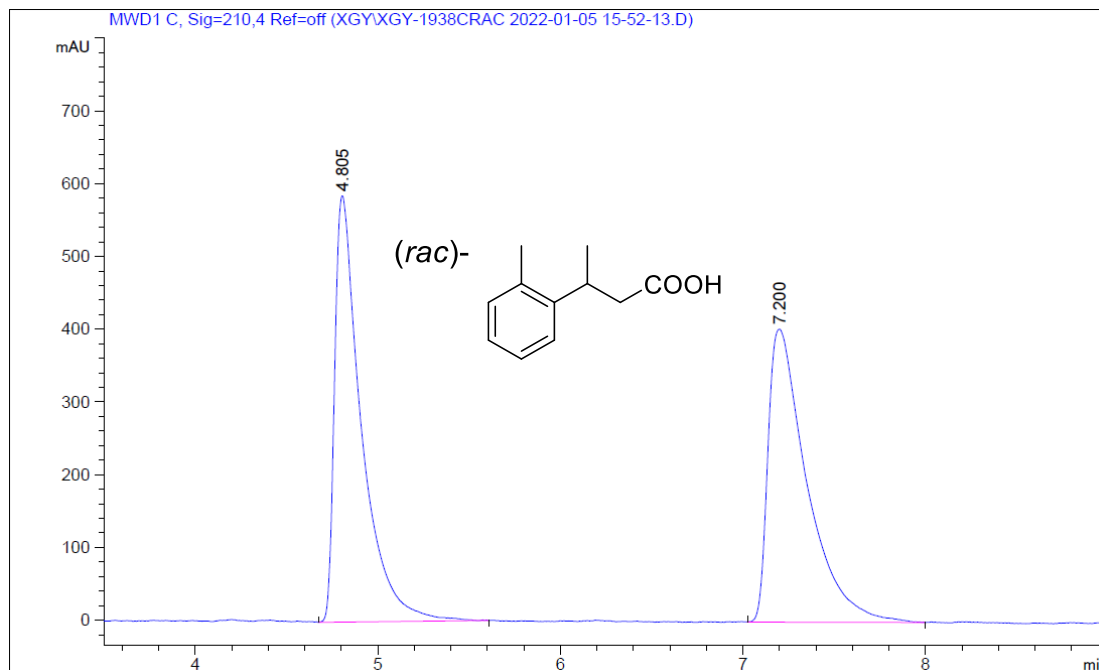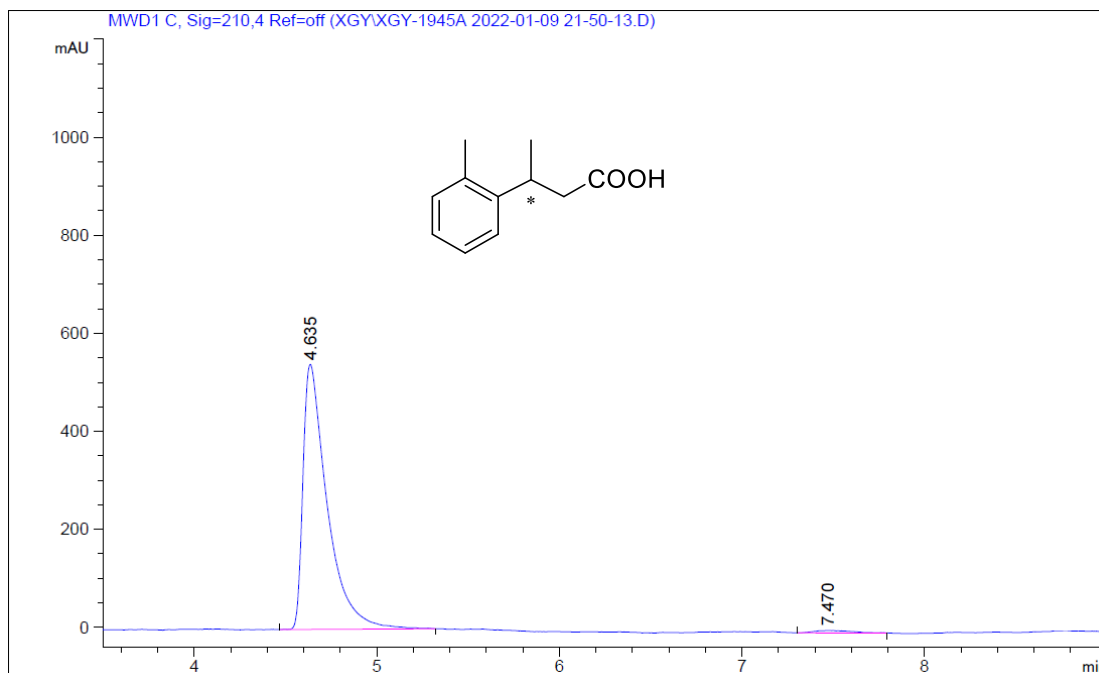

Signal 1: MWD1 C, Sig=210,4 Ref=off

| Peak # | RetTime [min] | Type | Width [min] | Area [mAU*s] | Height [mAU] | Area %  |
|--------|---------------|------|-------------|--------------|--------------|---------|
| 1      | 4.635         | VB R | 0.1327      | 4988.40332   | 540.54468    | 98.5776 |
| 2      | 7.470         | BB   | 0.1683      | 71.98016     | 5.14191      | 1.4224  |

(-)-3-(*m*-tolyl)butanoic acid (**2k**)

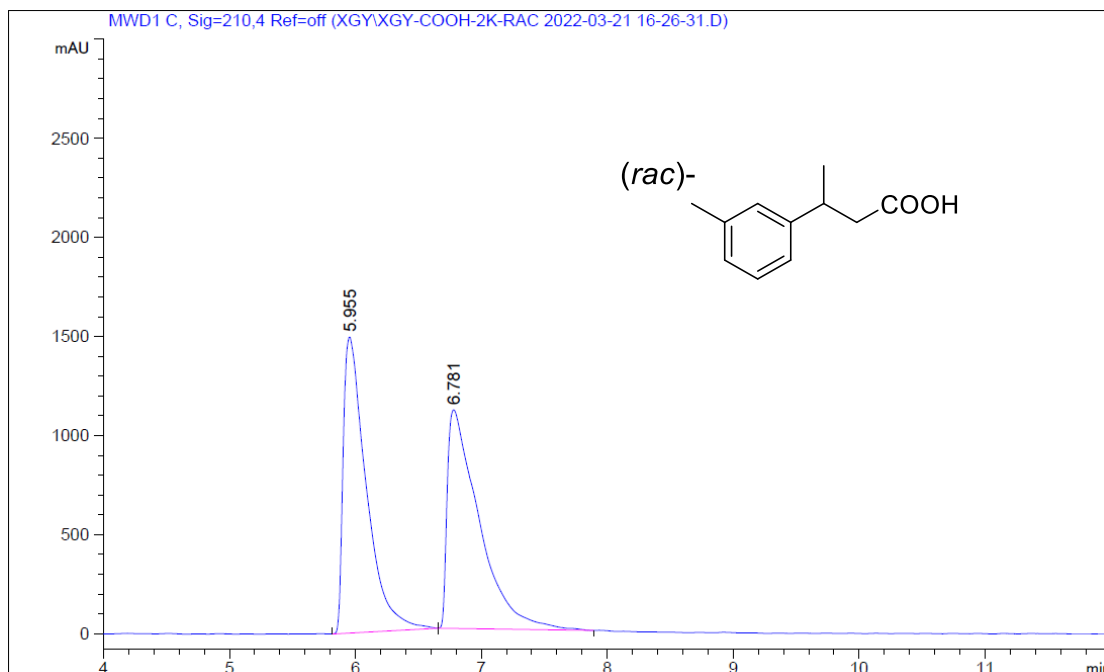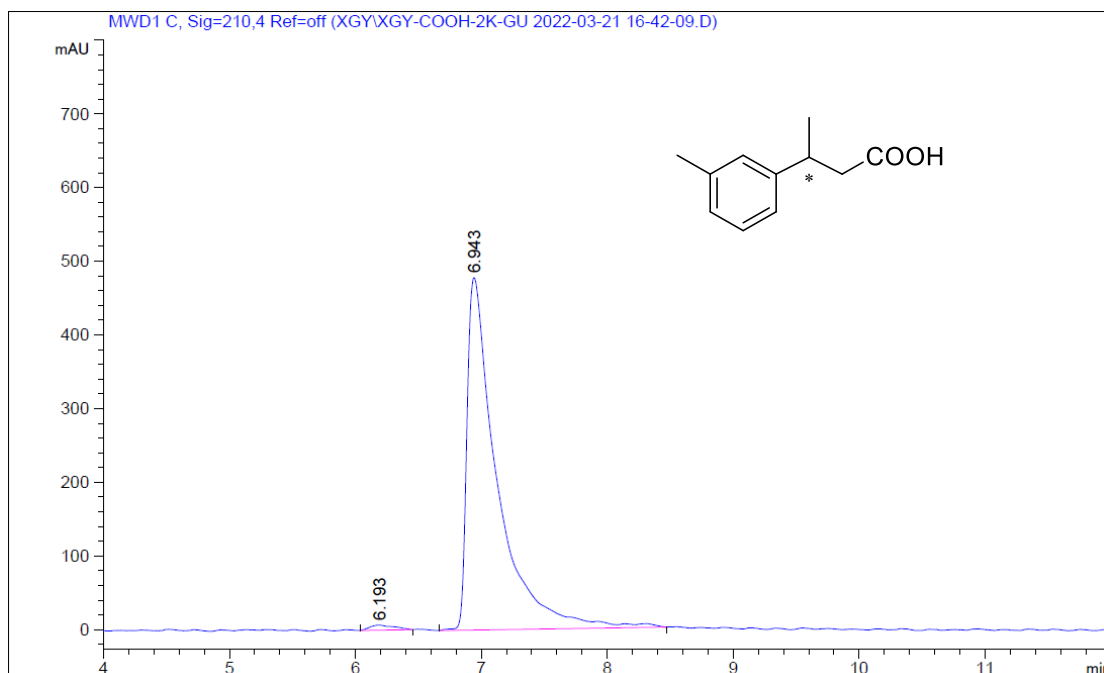

Signal 1: MWD1 C, Sig=210,4 Ref=off

| Peak # | RetTime [min] | Type | Width [min] | Area [mAU*s] | Height [mAU] | Area %  |
|--------|---------------|------|-------------|--------------|--------------|---------|
| 1      | 6.193         | BB   | 0.1568      | 91.70895     | 6.97732      | 1.1350  |
| 2      | 6.943         | BV R | 0.2294      | 7988.40869   | 478.13507    | 98.8650 |

*(R)*-3-(*p*-tolyl)butanoic acid (**21**)

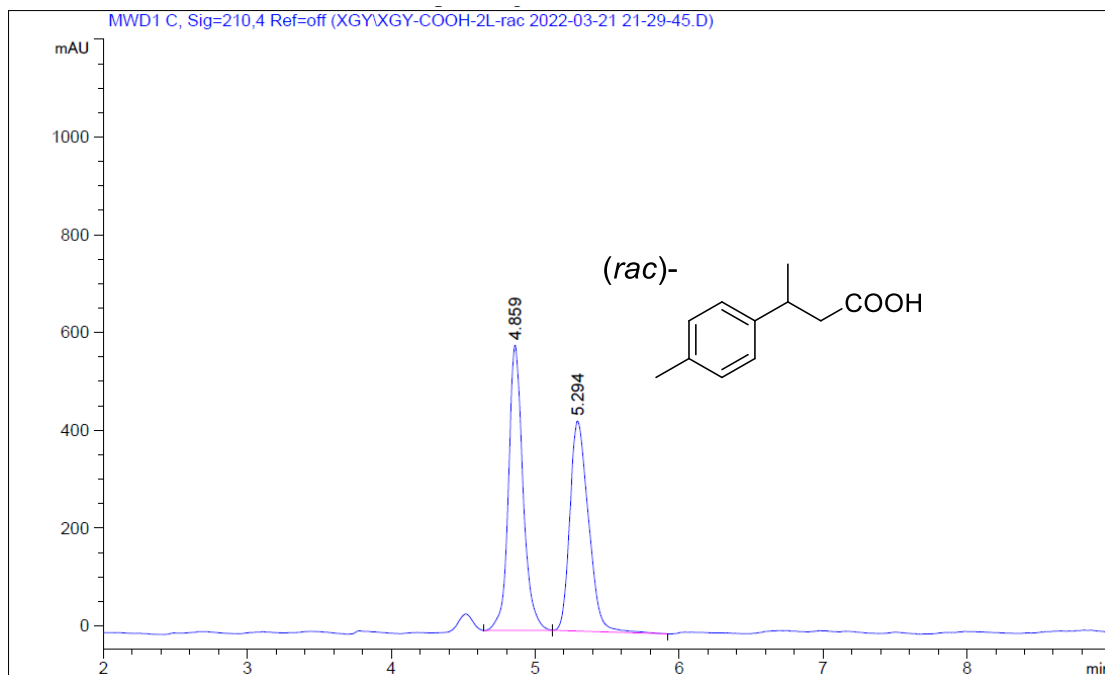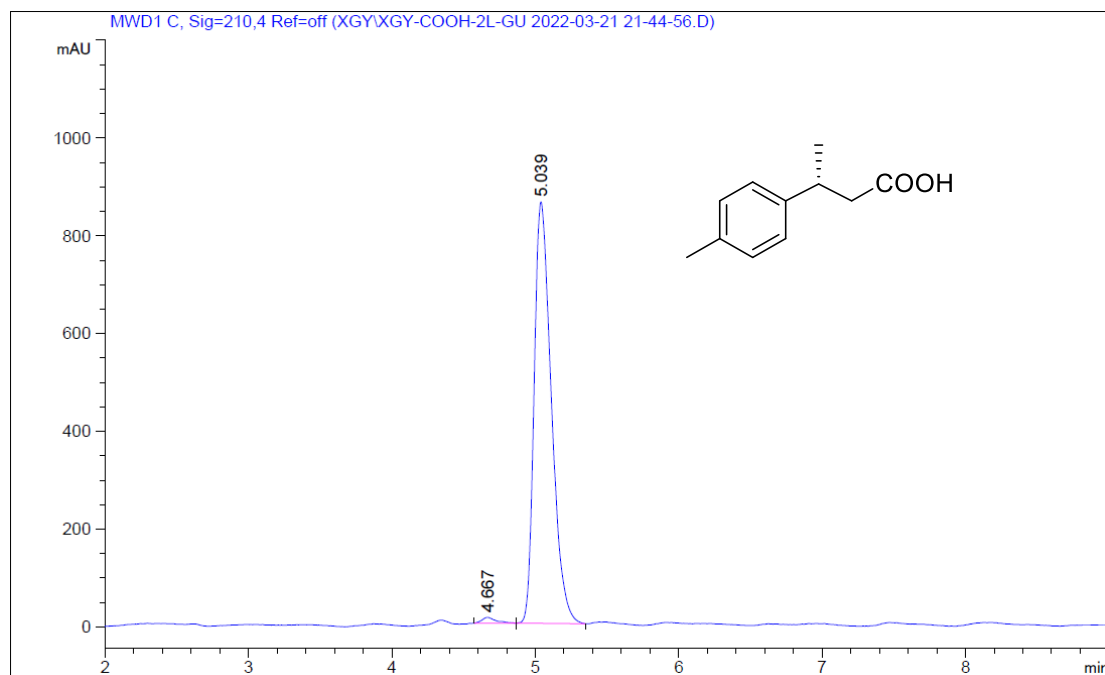

Signal 1: MWD1 C, Sig=210,4 Ref=off

| Peak # | RetTime [min] | Type | Width [min] | Area [mAU*s] | Height [mAU] | Area %  |
|--------|---------------|------|-------------|--------------|--------------|---------|
| 1      | 4.667         | BB   | 0.0844      | 80.88847     | 12.04179     | 1.1136  |
| 2      | 5.039         | BB   | 0.1247      | 7182.53320   | 861.82855    | 98.8864 |

(-)-3-(naphthalen-2-yl)butanoic acid (**2m**)

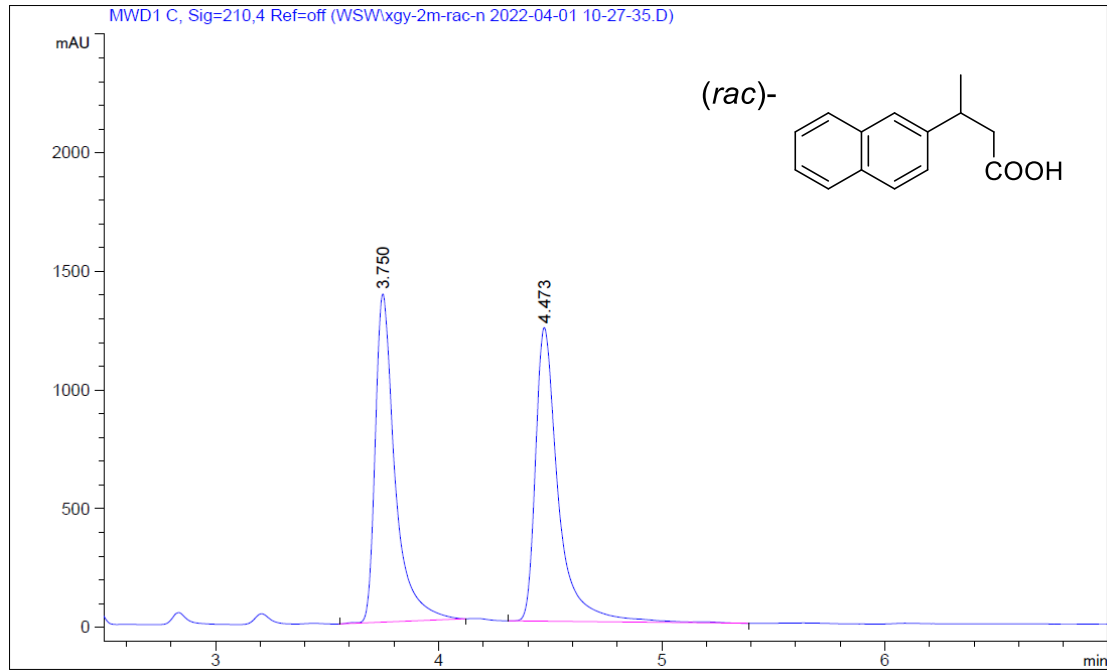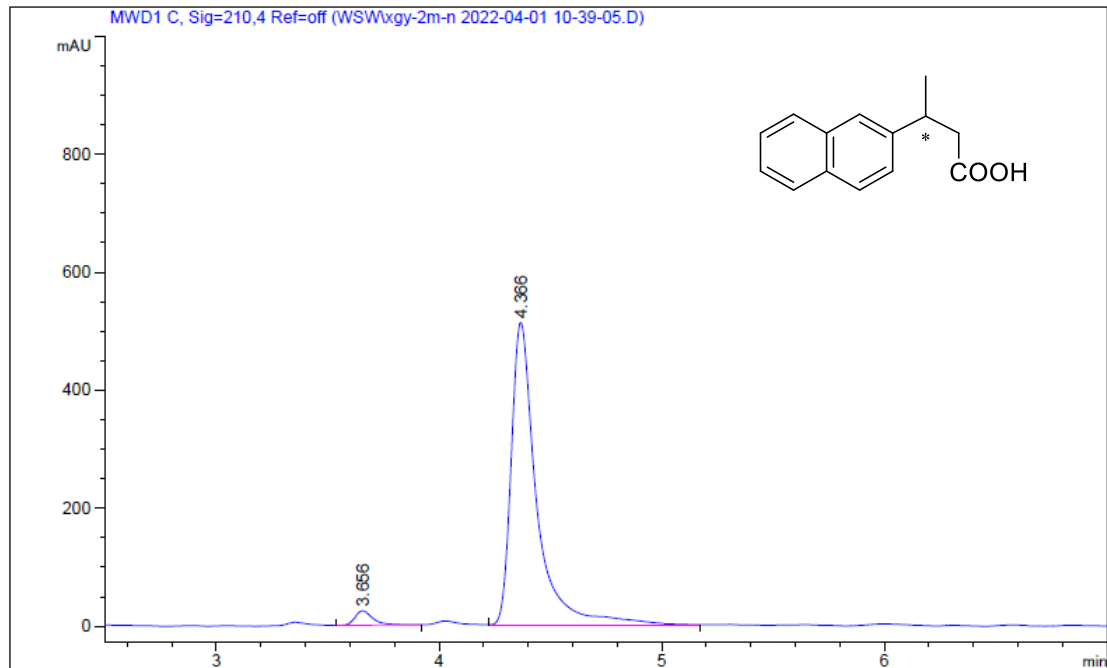

Signal 1: MWD1 C, Sig=210,4 Ref=off

| Peak # | RetTime [min] | Type | Width [min] | Area [mAU*s] | Height [mAU] | Area %  |
|--------|---------------|------|-------------|--------------|--------------|---------|
| 1      | 3.656         | BB   | 0.0829      | 138.97630    | 24.61253     | 3.3062  |
| 2      | 4.366         | BB   | 0.1156      | 4064.57178   | 511.90485    | 96.6938 |

(R)-3-phenylbutanoic acid (**2n**)

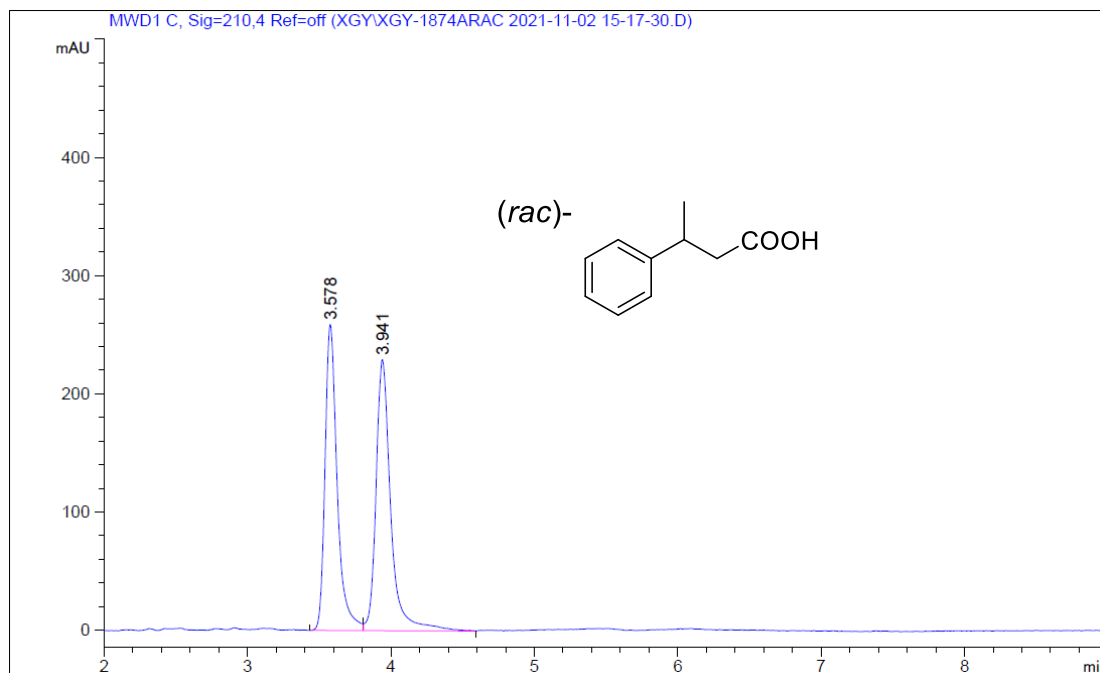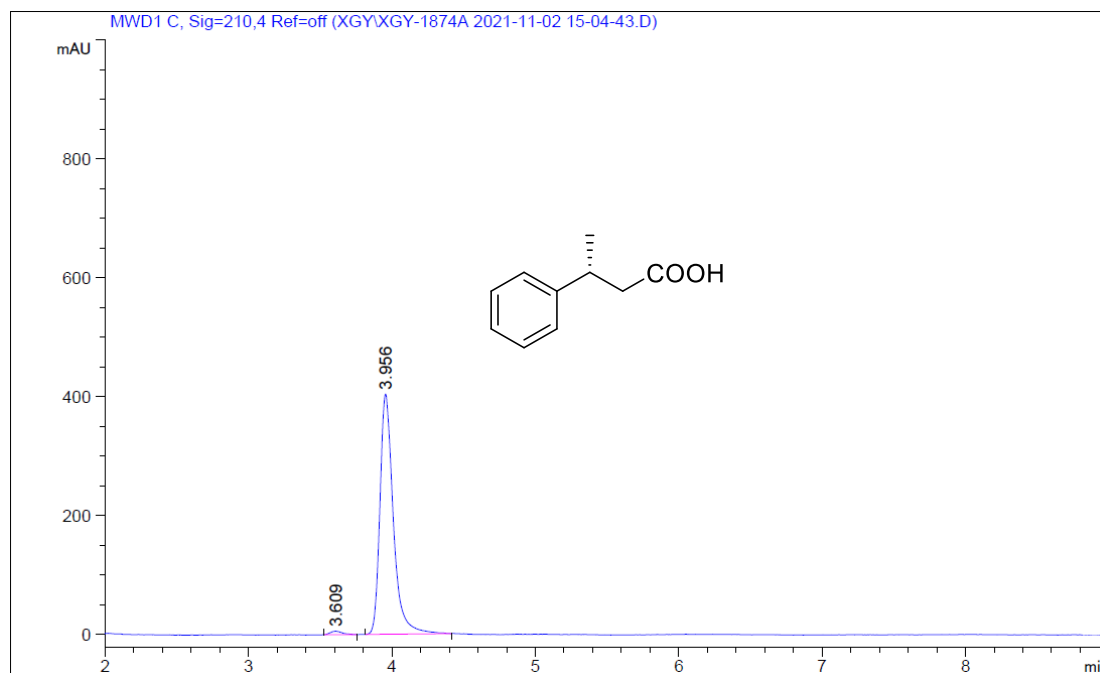

Signal 1: MWD1 C, Sig=210,4 Ref=off

| Peak # | RetTime [min] | Type | Width [min] | Area [mAU*s] | Height [mAU] | Area %  |
|--------|---------------|------|-------------|--------------|--------------|---------|
| 1      | 3.609         | BB   | 0.0689      | 33.49699     | 5.79442      | 1.2641  |
| 2      | 3.956         | BB   | 0.0976      | 2616.37158   | 403.87708    | 98.7359 |



(R)-3-phenylpentanoic acid (**2o**)

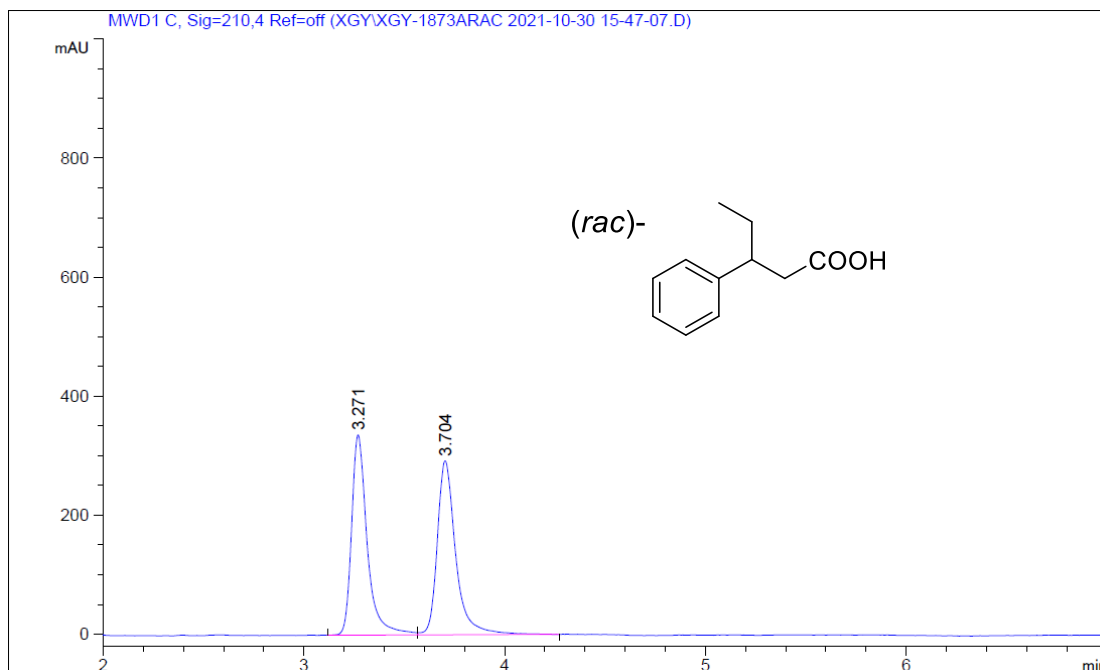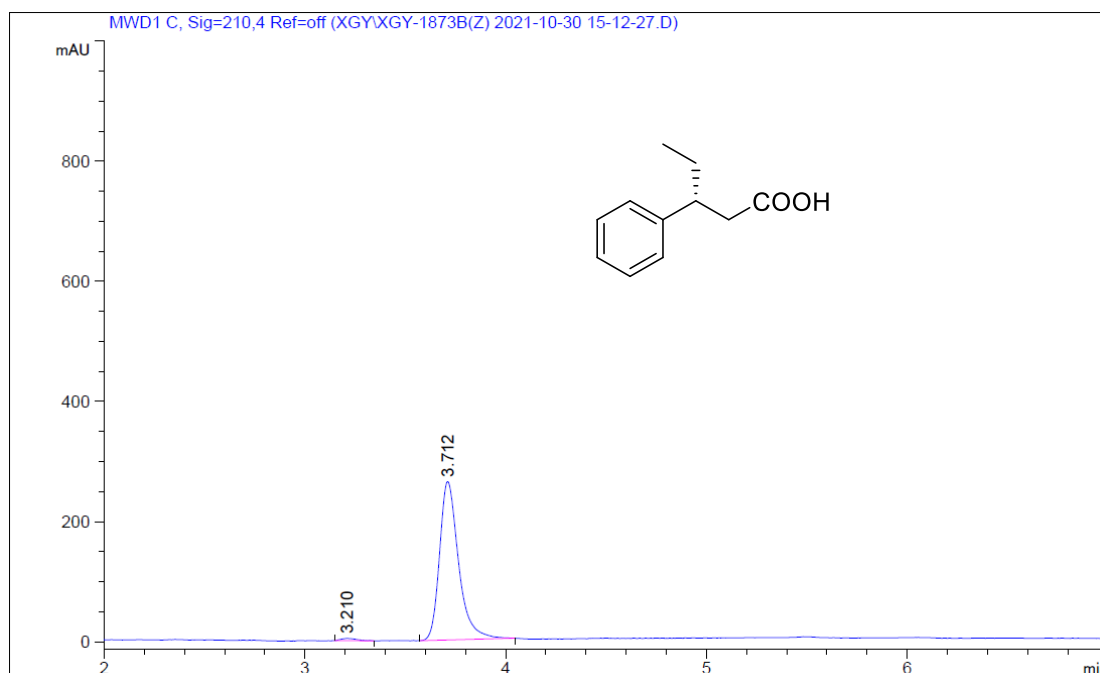

Signal 1: MWD1 C, Sig=210,4 Ref=off

| Peak # | RetTime [min] | Type | Width [min] | Area [mAU*s] | Height [mAU] | Area %  |
|--------|---------------|------|-------------|--------------|--------------|---------|
| 1      | 3.210         | BB   | 0.0693      | 20.82004     | 3.86967      | 1.1851  |
| 2      | 3.712         | BB   | 0.0993      | 1735.92993   | 263.71954    | 98.8149 |

(S)-4-methyl-3-phenylpentanoic acid (2p)

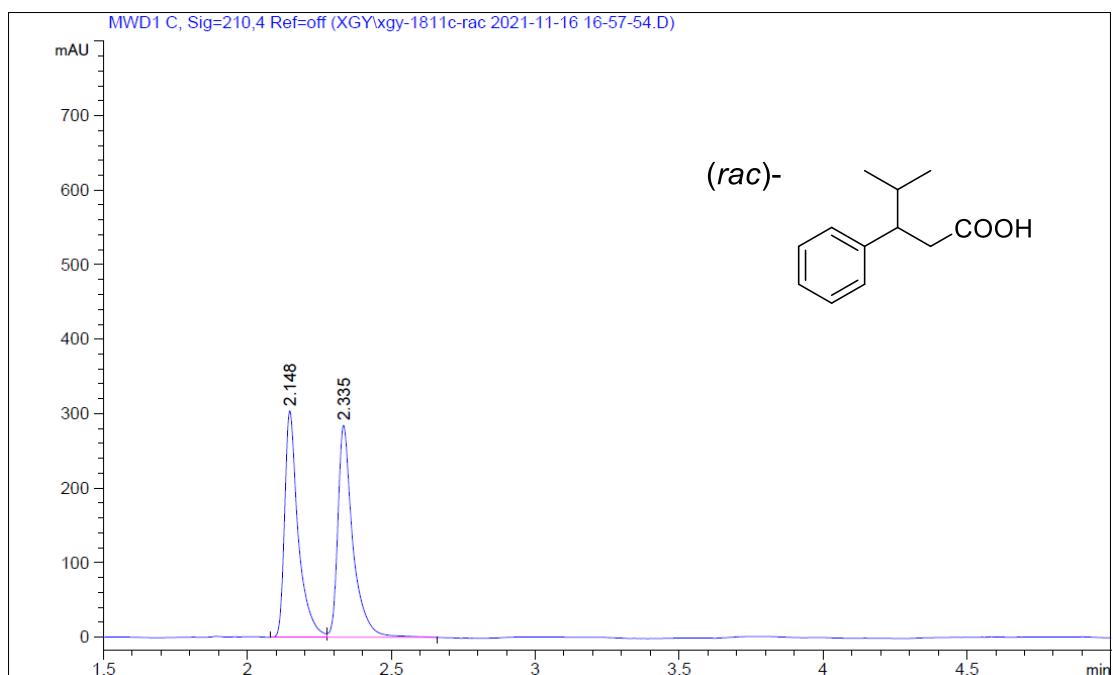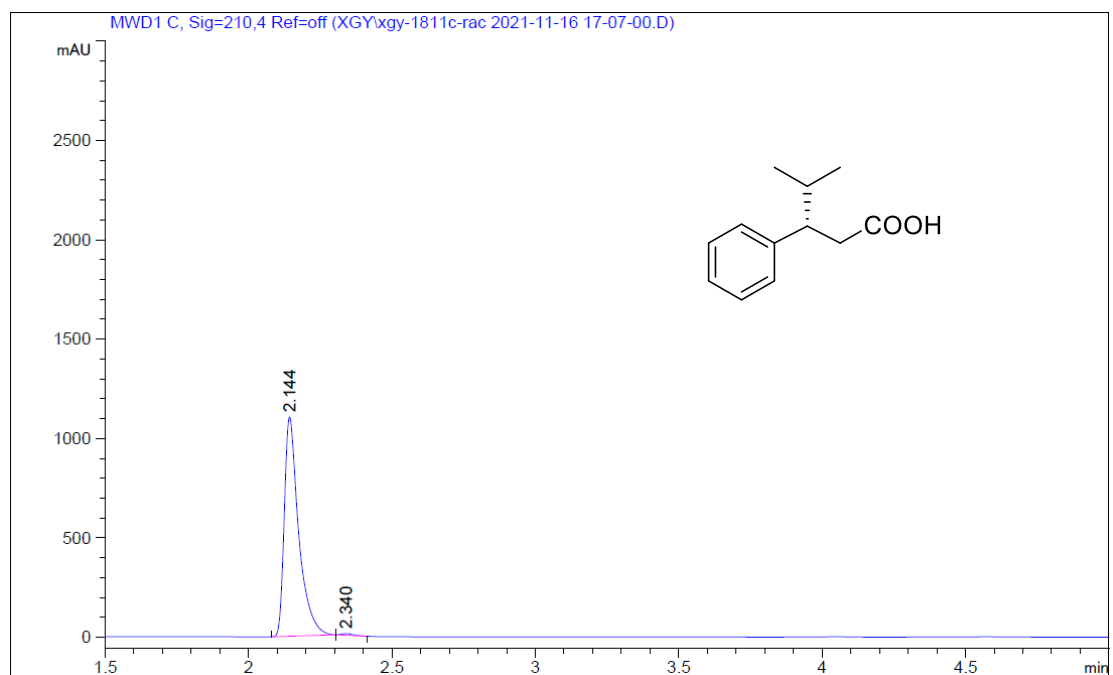

Signal 1: MWD1 C, Sig=210,4 Ref=off

| Peak # | RetTime [min] | Type | Width [min] | Area [mAU*s] | Height [mAU] | Area %  |
|--------|---------------|------|-------------|--------------|--------------|---------|
| 1      | 2.144         | BB   | 0.0517      | 3847.97534   | 1103.20752   | 99.4162 |
| 2      | 2.340         | BB   | 0.0424      | 22.59569     | 8.53228      | 0.5838  |

(S)-3-cyclohexyl-3-phenylpropanoic acid (**2q**)

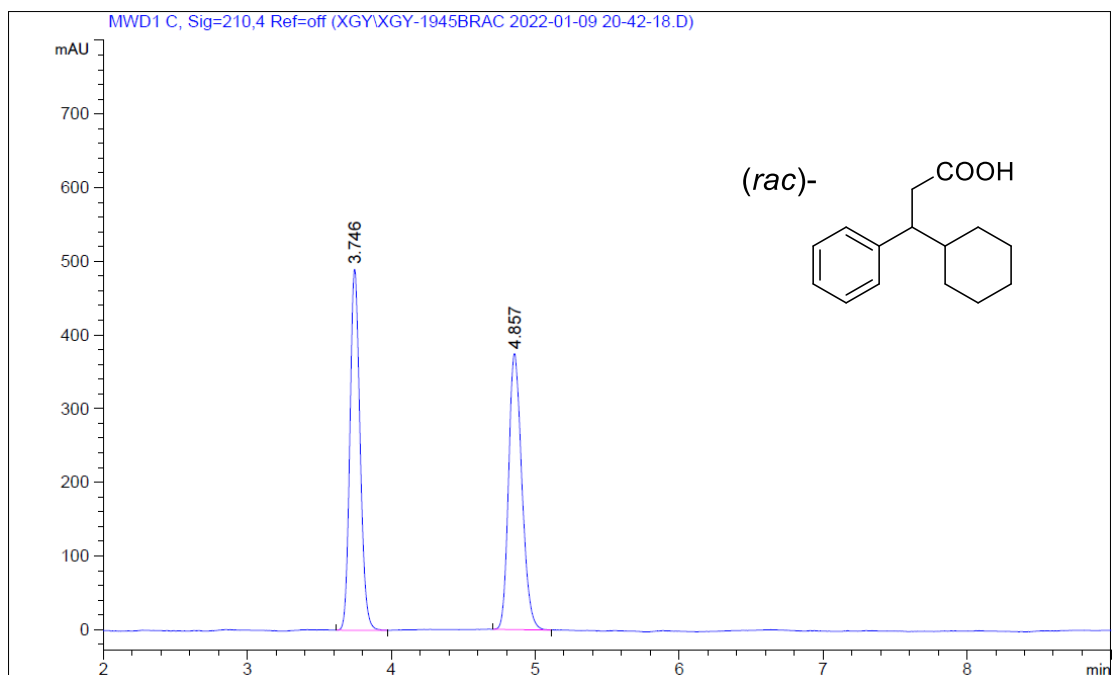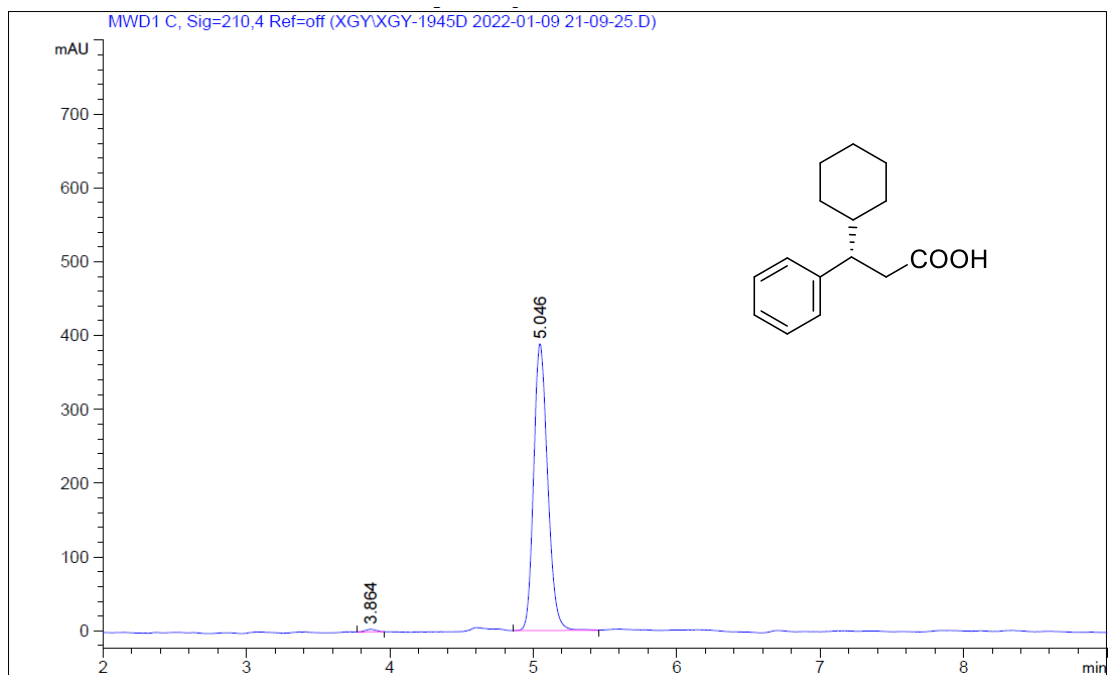

Signal 1: MWD1 C, Sig=210,4 Ref=off

| Peak # | RetTime [min] | Type | Width [min] | Area [mAU*s] | Height [mAU] | Area %  |
|--------|---------------|------|-------------|--------------|--------------|---------|
| 1      | 3.864         | VV R | 0.0603      | 18.17768     | 3.73043      | 0.6833  |
| 2      | 5.046         | BV R | 0.1039      | 2642.14722   | 388.31042    | 99.3167 |

(S)-3-phenylpentanoic acid (**2r**)

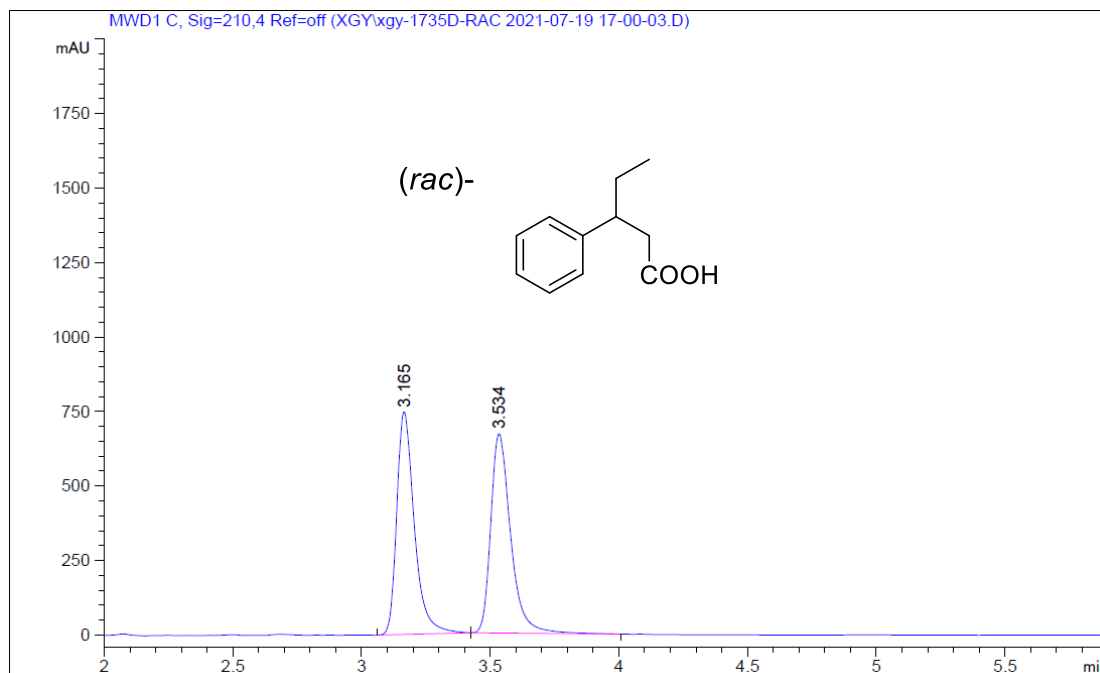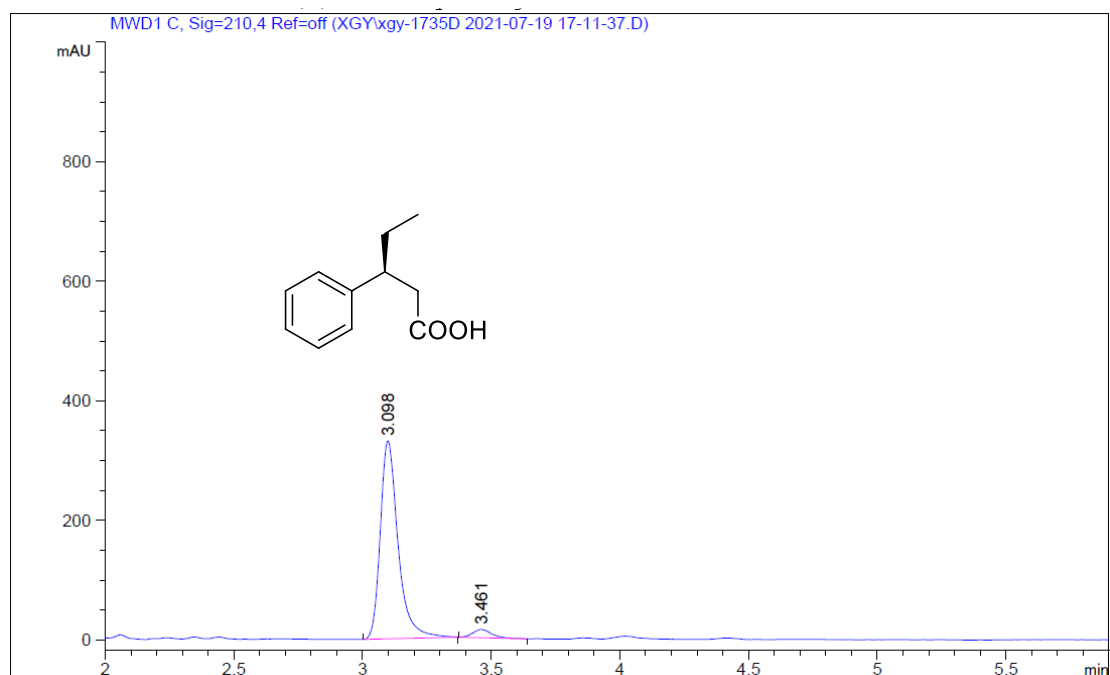

Signal 1: MWD1 C, Sig=210,4 Ref=off

| Peak # | RetTime [min] | Type | Width [min] | Area [mAU*s] | Height [mAU] | Area %  |
|--------|---------------|------|-------------|--------------|--------------|---------|
| 1      | 3.098         | BB   | 0.0736      | 1592.53467   | 331.01434    | 95.6464 |
| 2      | 3.461         | BB   | 0.0686      | 72.48919     | 14.17848     | 4.3536  |

(R)-3-phenylpentanoic acid (**2s**)

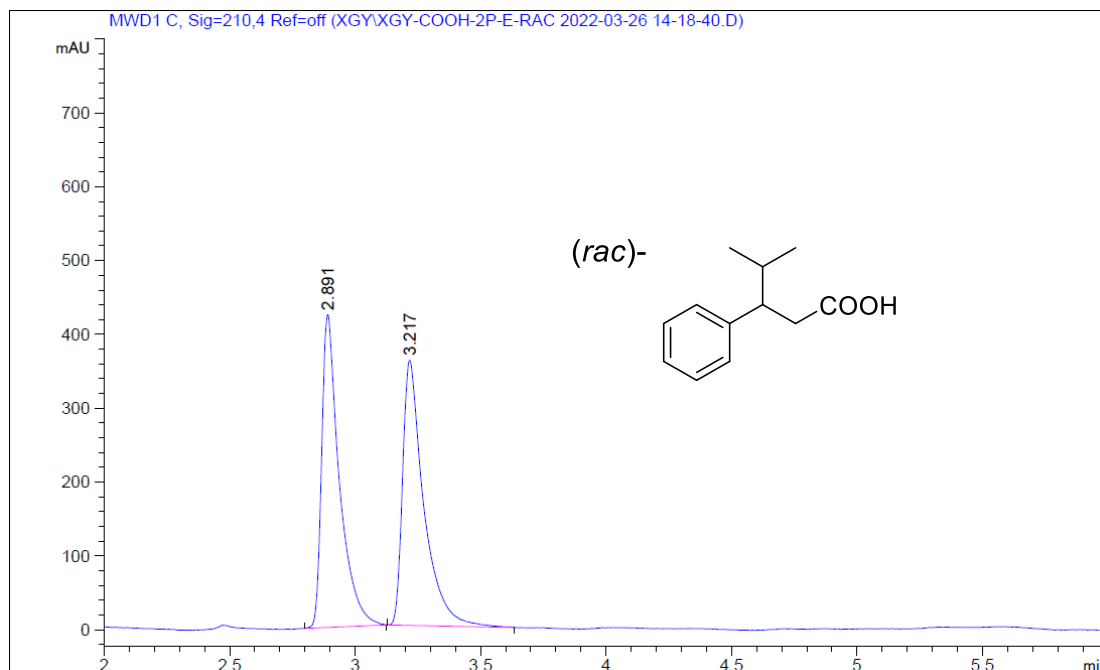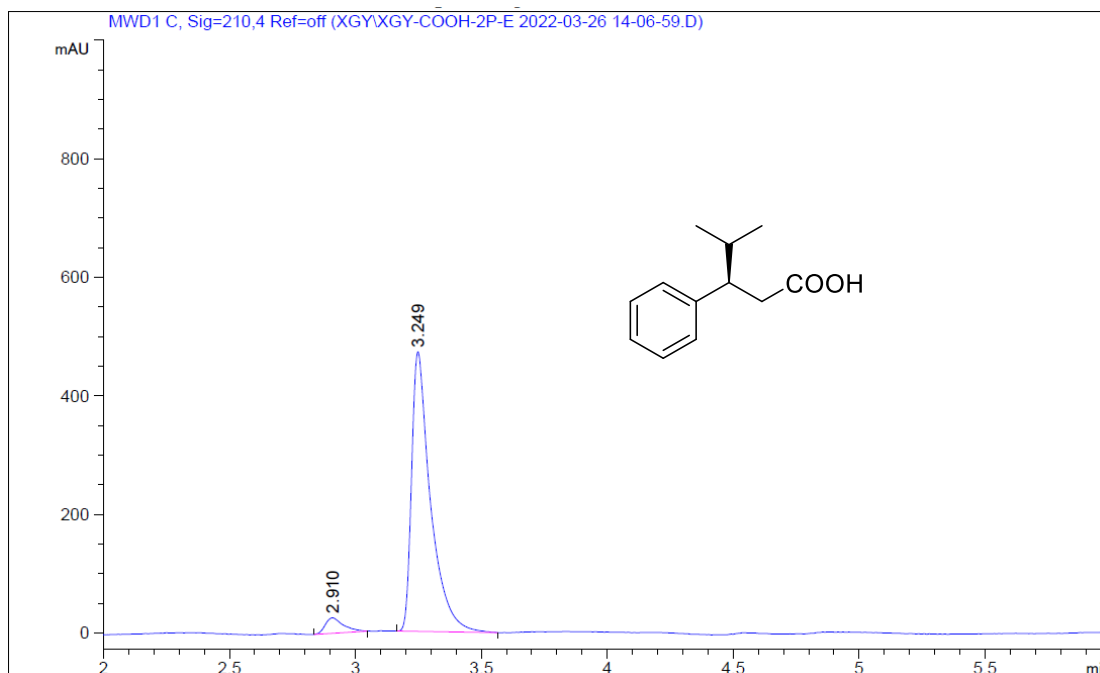

Signal 1: MWD1 C, Sig=210,4 Ref=off

| Peak # | RetTime [min] | Type | Width [min] | Area [mAU*s] | Height [mAU] | Area %  |
|--------|---------------|------|-------------|--------------|--------------|---------|
| 1      | 2.910         | BB   | 0.0704      | 130.26912    | 26.23104     | 5.0232  |
| 2      | 3.249         | BB   | 0.0764      | 2463.08789   | 471.69113    | 94.9768 |

(-)-3-phenyl-3-(*o*-tolyl)propanoic acid (**2t**)

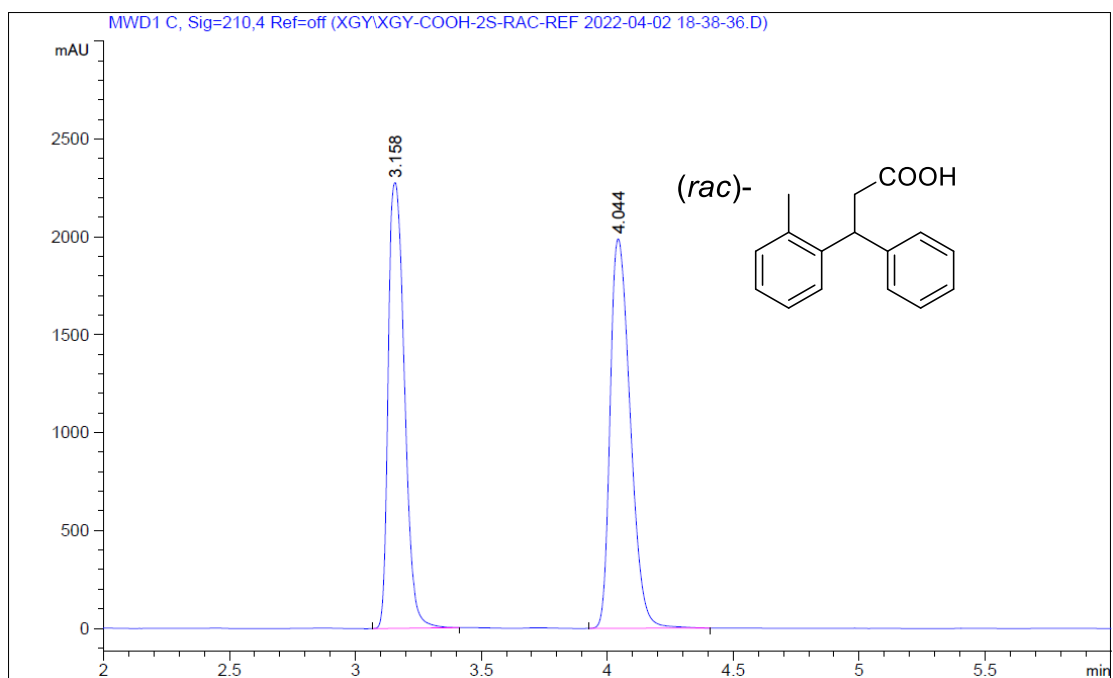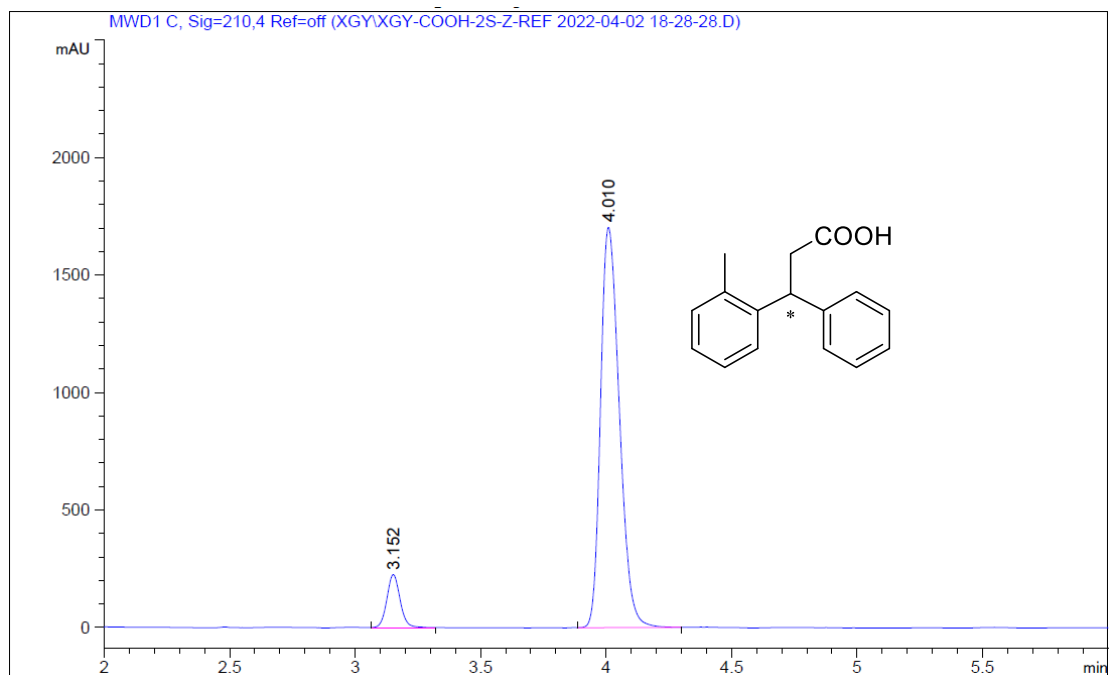

Signal 1: MWD1 C, Sig=210,4 Ref=off

| Peak # | RetTime [min] | Type | Width [min] | Area [mAU*s] | Height [mAU] | Area %  |
|--------|---------------|------|-------------|--------------|--------------|---------|
| 1      | 3.152         | BB   | 0.0559      | 830.93750    | 226.03180    | 8.5639  |
| 2      | 4.010         | BB   | 0.0822      | 8871.81445   | 1704.39001   | 91.4361 |

(-)-3-phenyl-3-(*o*-tolyl)propanoic acid (**2u**)

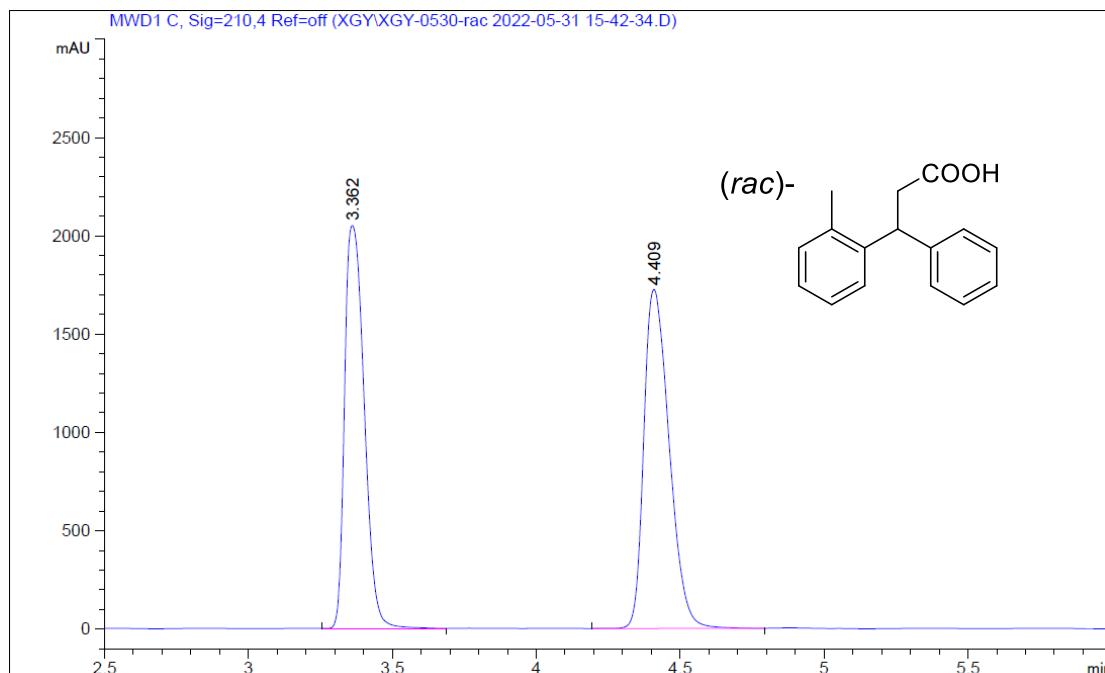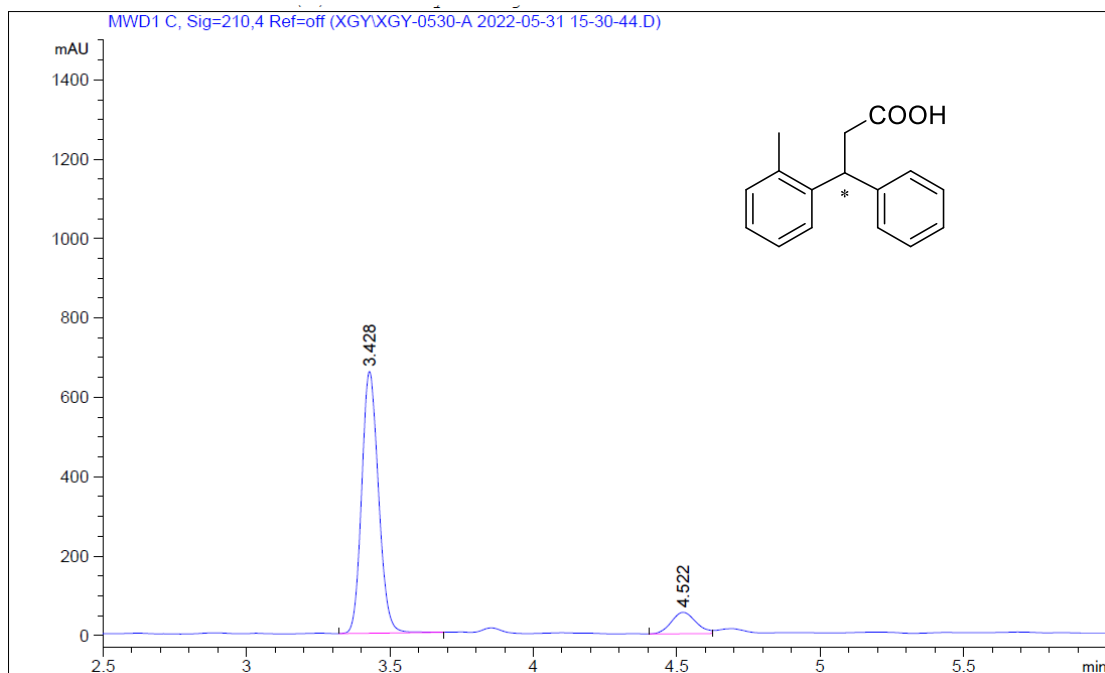

Signal 1: MWD1 C, Sig=210,4 Ref=off

| Peak # | RetTime [min] | Type | Width [min] | Area [mAU*s] | Height [mAU] | Area %  |
|--------|---------------|------|-------------|--------------|--------------|---------|
| 1      | 3.428         | BB   | 0.0636      | 2688.08936   | 659.51123    | 89.2509 |
| 2      | 4.522         | BV   | 0.0921      | 323.74454    | 53.86615     | 10.7491 |

(-)-ethyl 3-(2-fluorophenyl)butanoate (**2v**)

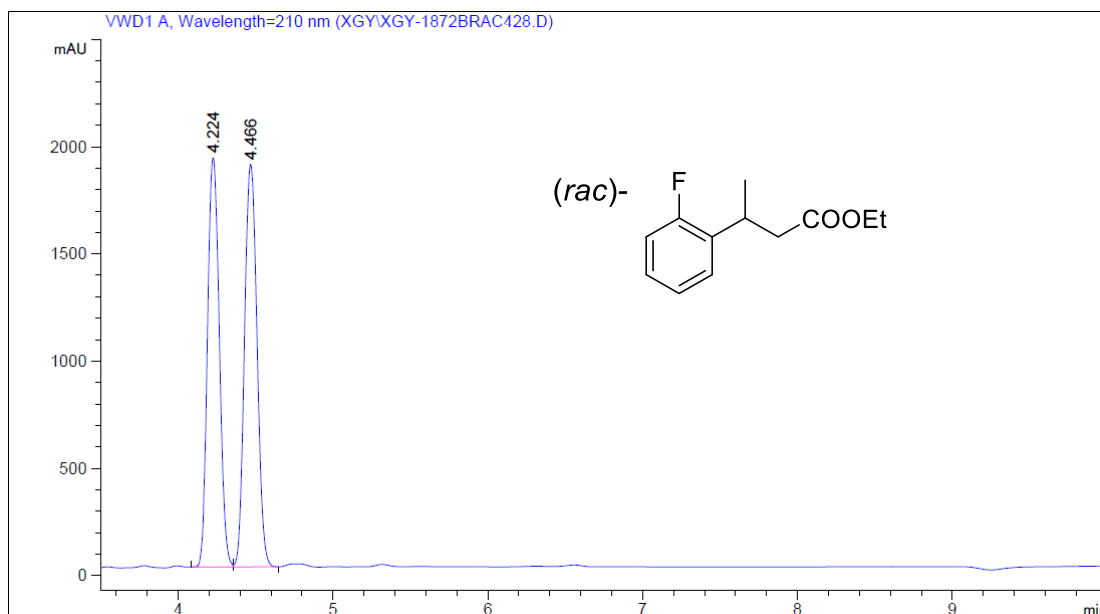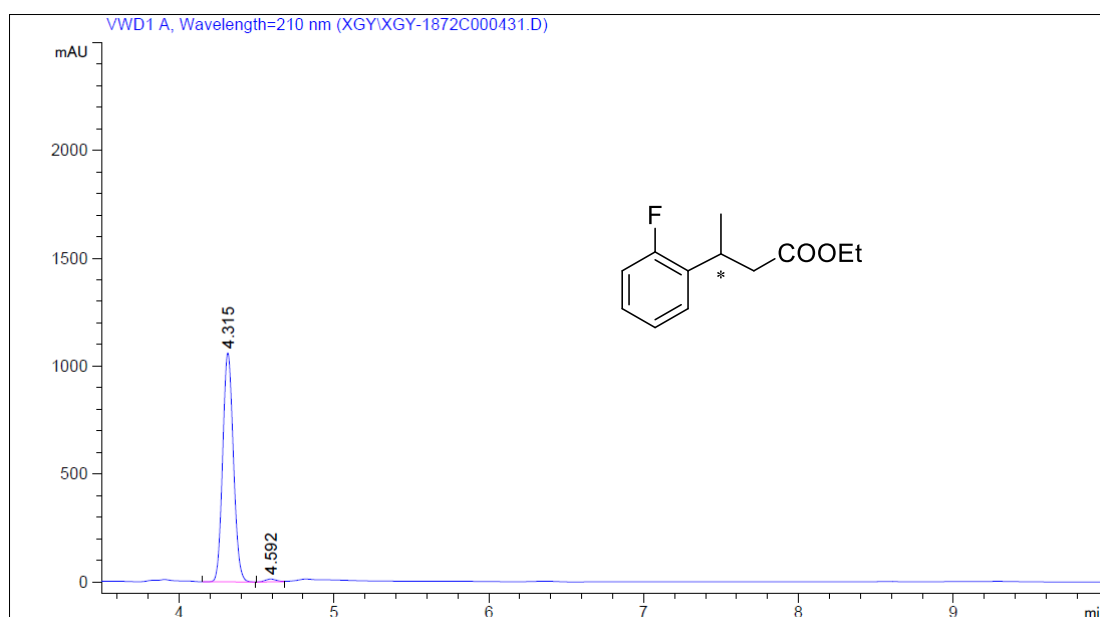

Signal 1: VWD1 A, Wavelength=210 nm

| Peak # | RetTime [min] | Type | Width [min] | Area [mAU*s] | Height [mAU] | Area %  |
|--------|---------------|------|-------------|--------------|--------------|---------|
| 1      | 4.315         | BB   | 0.0750      | 5099.10742   | 1061.46033   | 98.9269 |
| 2      | 4.592         | BB   | 0.0719      | 55.31410     | 12.19748     | 1.0731  |



(R)-3-phenylbutan-1-ol (3)

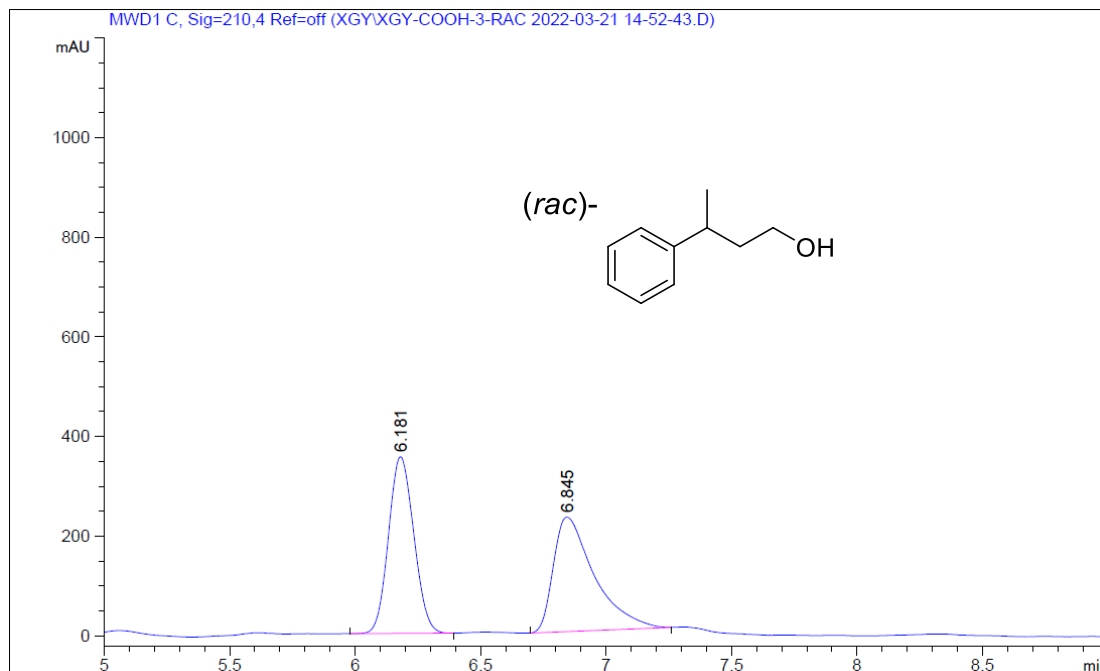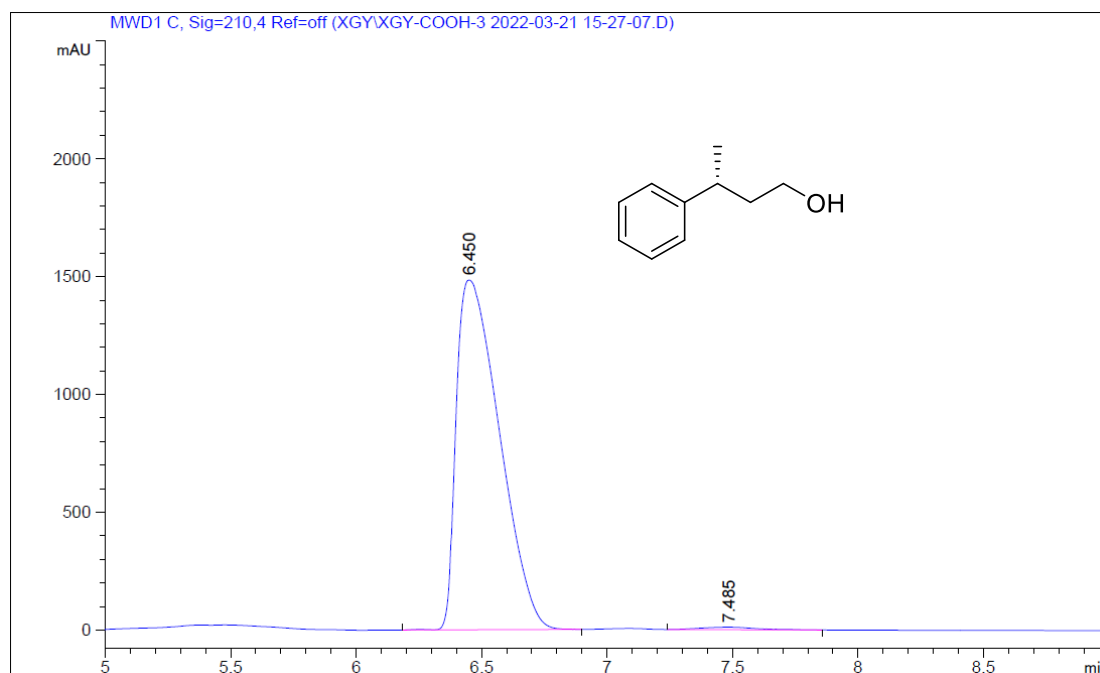

Signal 1: MWD1 C, Sig=210,4 Ref=off

| Peak # | RetTime [min] | Type | Width [min] | Area [mAU*s] | Height [mAU] | Area %  |
|--------|---------------|------|-------------|--------------|--------------|---------|
| 1      | 6.450         | VB R | 0.1644      | 1.76845e4    | 1484.54358   | 99.0370 |
| 2      | 7.485         | BB   | 0.1844      | 171.96130    | 11.08819     | 0.9630  |

(R)-3-methyl-2,3-dihydro-1H-inden-1-one (4)

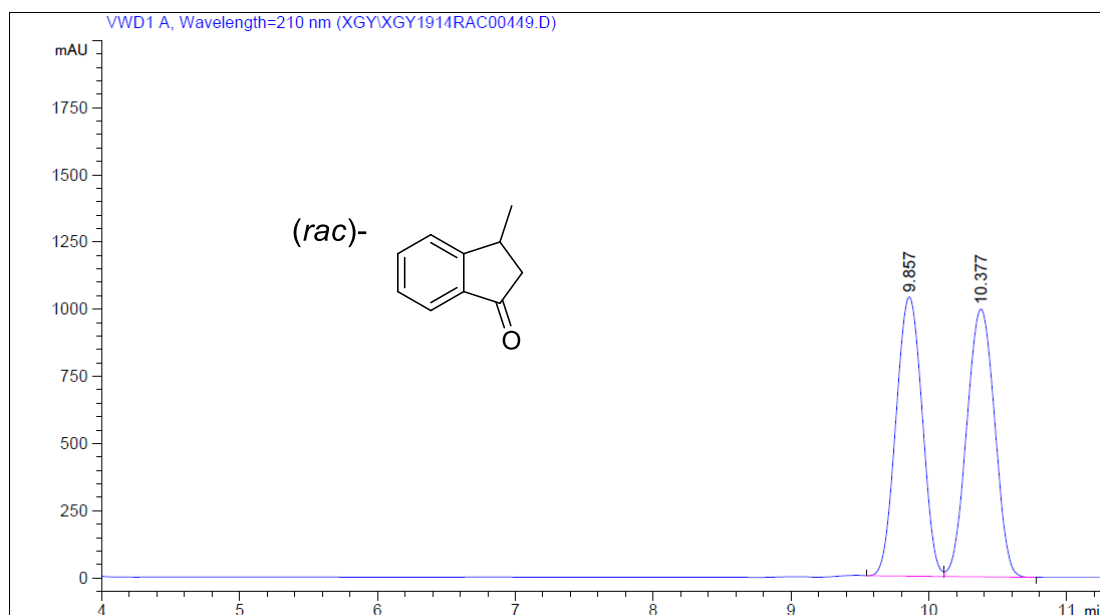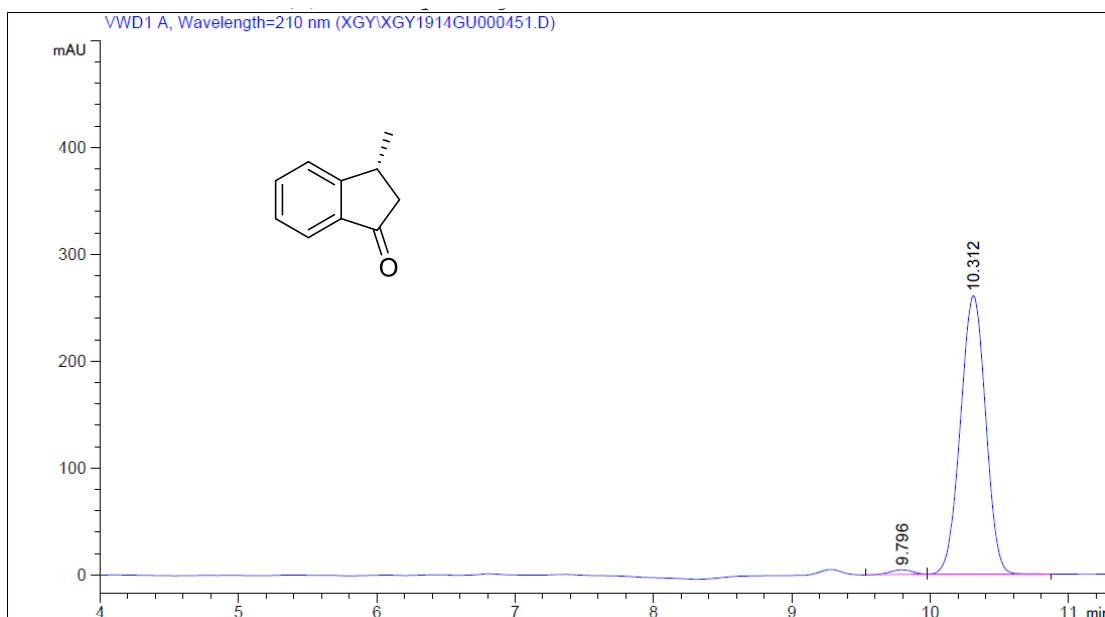

Signal 1: VWD1 A, Wavelength=210 nm

| Peak # | RetTime [min] | Type | Width [min] | Area [mAU*s] | Height [mAU] | Area %  |
|--------|---------------|------|-------------|--------------|--------------|---------|
| 1      | 9.796         | BB   | 0.1744      | 47.77046     | 4.30690      | 1.4289  |
| 2      | 10.312        | BB   | 0.1997      | 3295.41553   | 260.33994    | 98.5711 |

(1*S*,3*R*)-3-methyl-2,3-dihydro-1*H*-inden-1-ol (**5**)

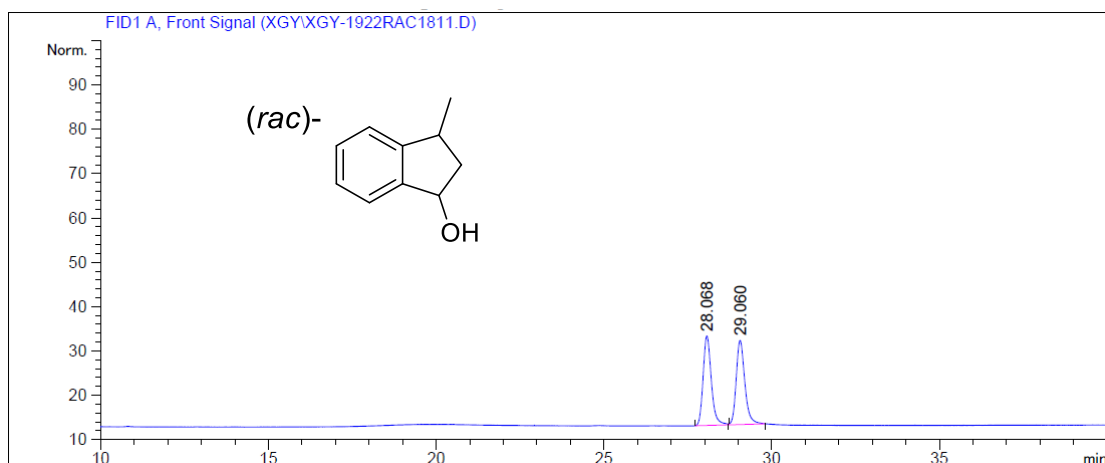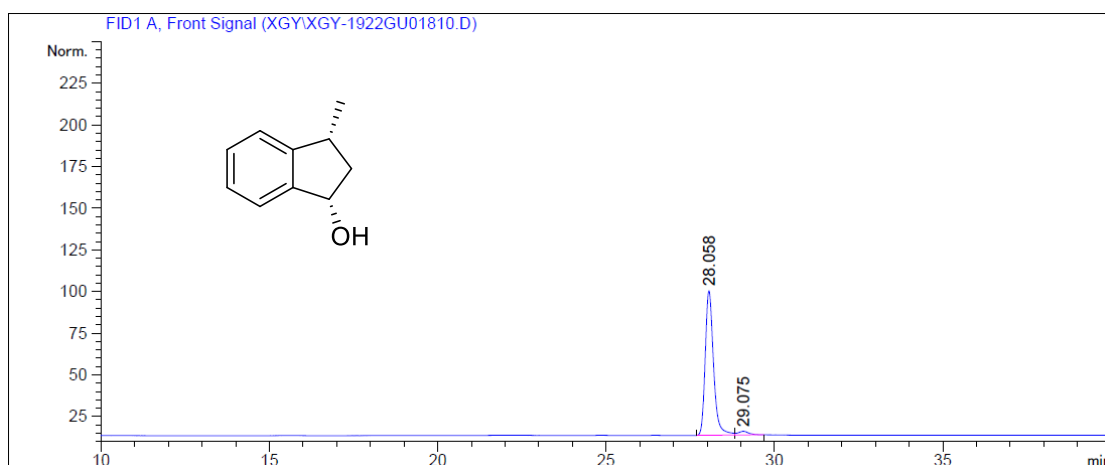

Signal 1: FID1 A, Front Signal

| Peak # | RetTime [min] | Type | Width [min] | Area [pA*s] | Height [pA] | Area %   |
|--------|---------------|------|-------------|-------------|-------------|----------|
| 1      | 28.058        | BV   | 0.2600      | 1480.17676  | 86.67854    | 96.74832 |
| 2      | 29.075        | VB   | 0.2673      | 49.74823    | 2.21756     | 3.25168  |

(R)-3-ethyl-2,3-dihydro-1H-inden-1-one (6)

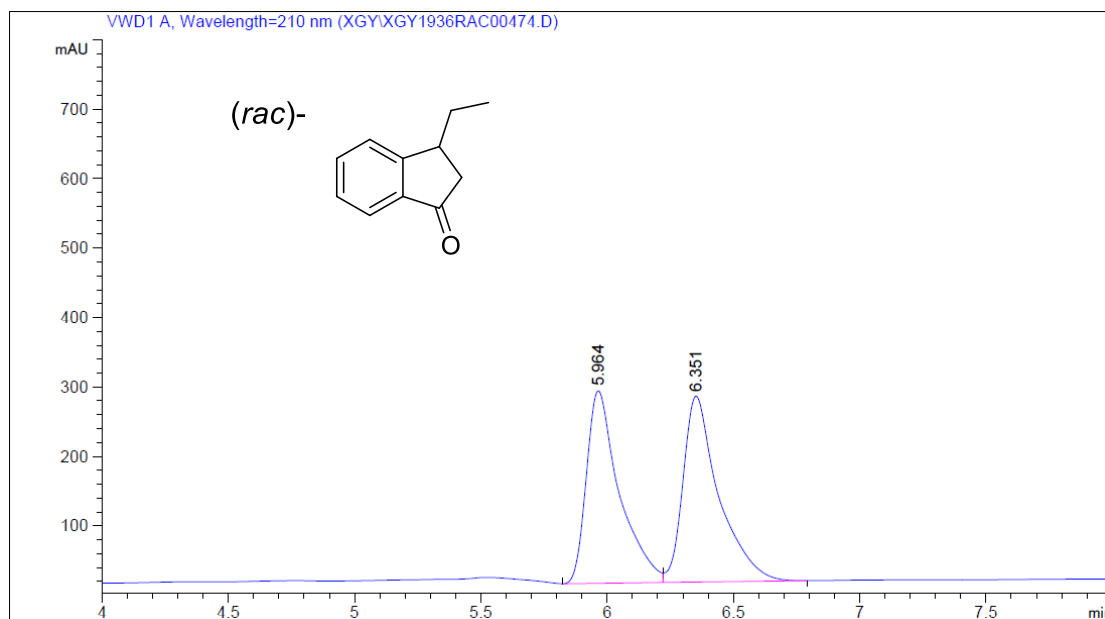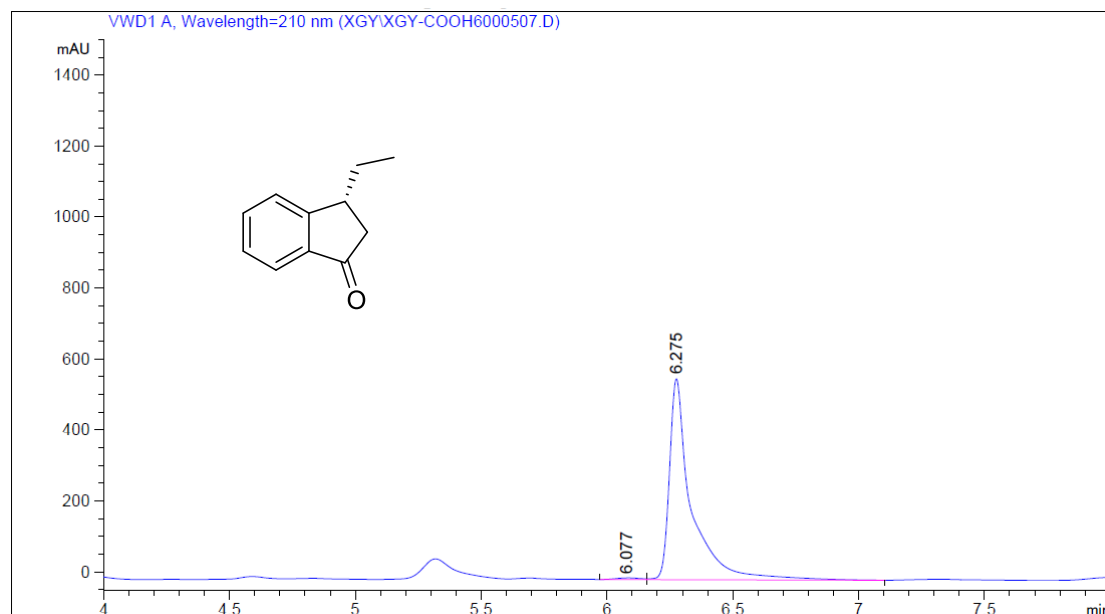

Signal 1: VWD1 A, Wavelength=210 nm

| Peak # | RetTime [min] | Type | Width [min] | Area [mAU*s] | Height [mAU] | Area %  |
|--------|---------------|------|-------------|--------------|--------------|---------|
| 1      | 6.077         | BV   | 0.0940      | 29.93592     | 4.78182      | 0.8594  |
| 2      | 6.275         | VB   | 0.0852      | 3453.41553   | 566.07141    | 99.1406 |

(R)-3-ethyl-2,3-dihydro-1H-inden-1-one oxime (7)

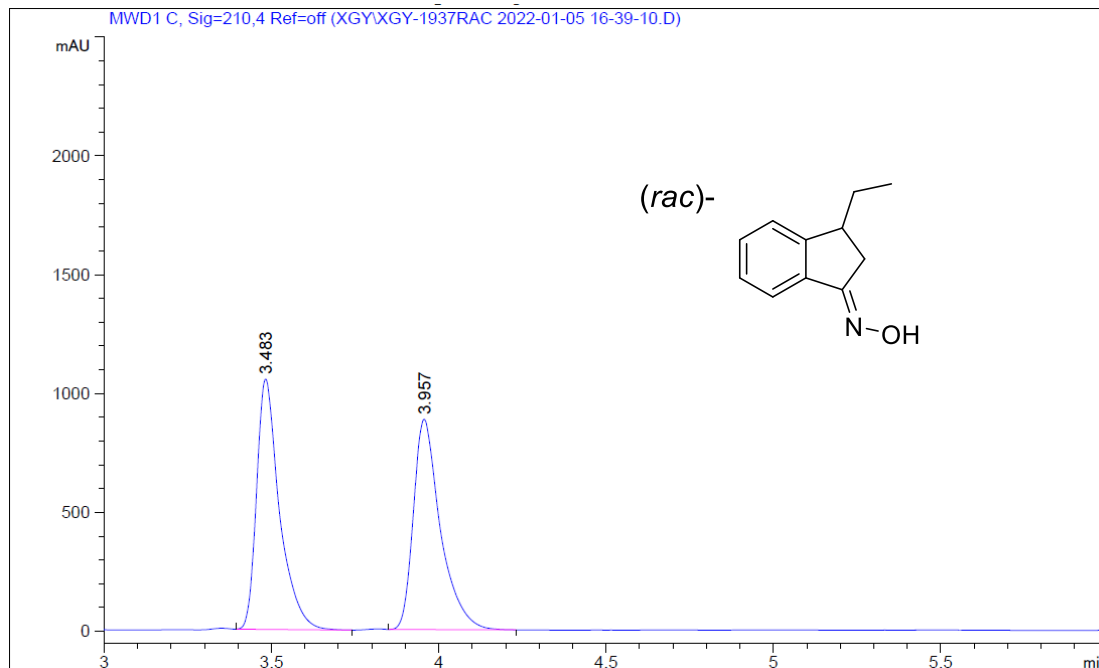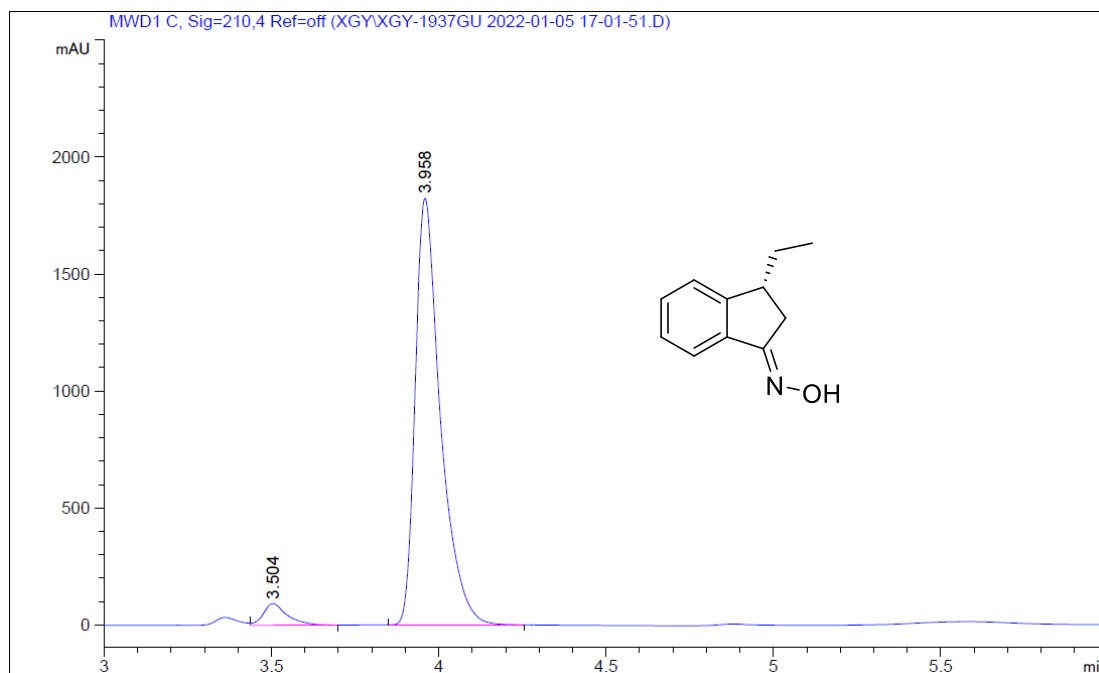

Signal 1: MWD1 C, Sig=210,4 Ref=off

| Peak # | RetTime [min] | Type | Width [min] | Area [mAU*s] | Height [mAU] | Area %  |
|--------|---------------|------|-------------|--------------|--------------|---------|
| 1      | 3.504         | BB   | 0.0670      | 388.37949    | 85.49287     | 3.8990  |
| 2      | 3.958         | BB   | 0.0782      | 9572.69922   | 1823.70300   | 96.1010 |

(R)-4-ethyl-1,2,3,4-tetrahydroquinoline (8)

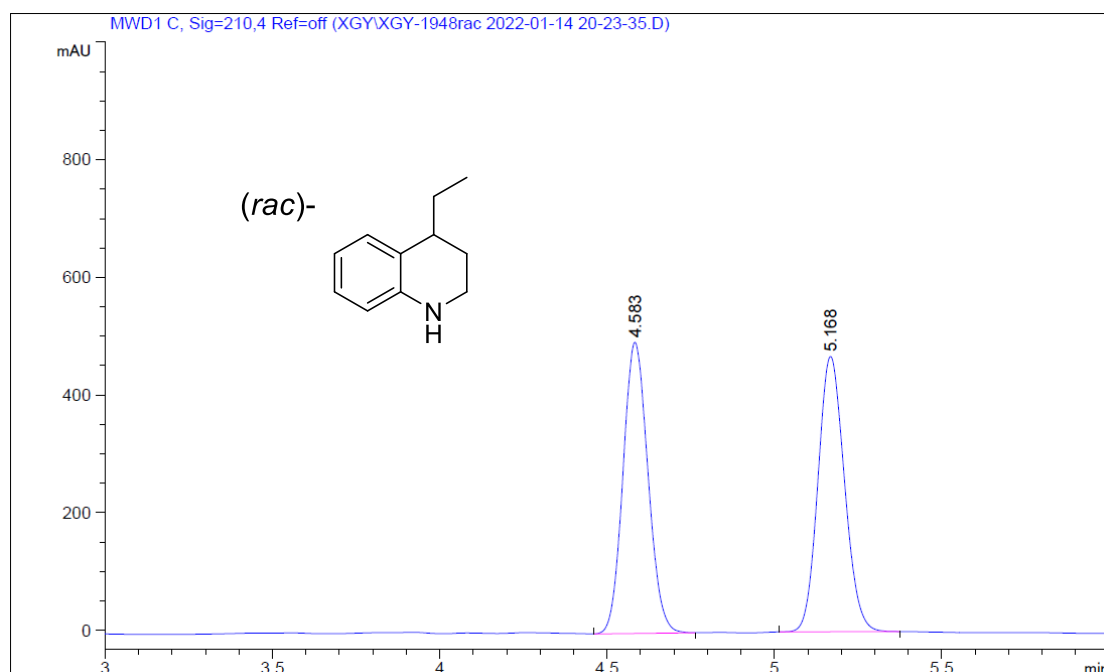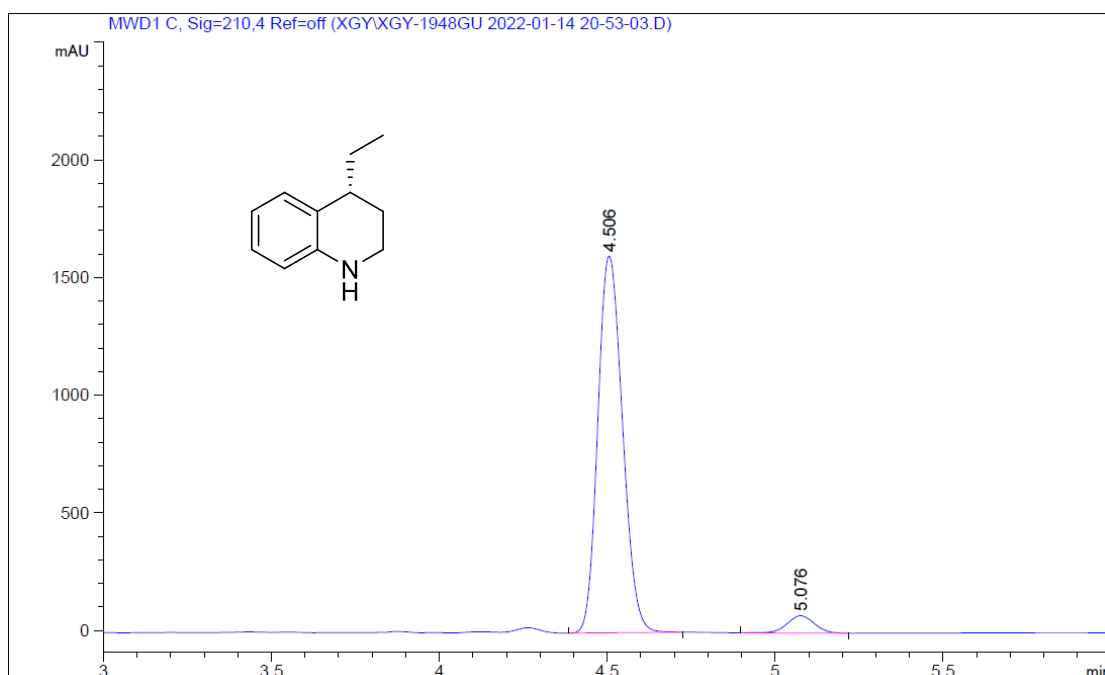

Signal 1: MWD1 C, Sig=210,4 Ref=off

| Peak # | RetTime [min] | Type | Width [min] | Area [mAU*s] | Height [mAU] | Area %  |
|--------|---------------|------|-------------|--------------|--------------|---------|
| 1      | 4.506         | BB   | 0.0811      | 8172.56982   | 1600.52576   | 95.1602 |
| 2      | 5.076         | BB   | 0.0859      | 415.65088    | 73.60310     | 4.8398  |
